# Supplementary material for: Association between gender and short-term outcome in patients with ST elevation myocardial infraction participating in the international, prospective, randomised Administration of Ticagrelor in the catheterisation Laboratory or in the Ambulance for New ST elevation myocardial Infarction to open the Coronary artery (ATLANTIC) trial: a prespecified analysis
Source: PubMed Central journal article supplement — BMJ Open. 2017 Sep 21;7(9):e015241. doi: 10.1136/bmjopen-2016-015241 (PMC5623480; doi:10.1136/bmjopen-2016-015241), 2017-09-21
Supplement: bmjopen-2016-015241.draft_revisions.pdf [file bmjopen-2016-015241.draft_revisions.pdf]

# BMJ Open

BMJ Open is committed to open peer review. As part of this commitment we make the peer review history of every article we publish publicly available.

When an article is published we post the peer reviewers' comments and the authors' responses online. We also post the versions of the paper that were used during peer review. These are the versions that the peer review comments apply to.

The versions of the paper that follow are the versions that were submitted during the peer review process. They are not the versions of record or the final published versions. They should not be cited or distributed as the published version of this manuscript.

BMJ Open is an open access journal and the full, final, typeset and author-corrected version of record of the manuscript is available on our site with no access controls, subscription charges or pay-per-view fees (<http://bmjopen.bmj.com>).

If you have any questions on BMJ Open's open peer review process please email [info.bmjopen@bmj.com](mailto:info.bmjopen@bmj.com)

# BMJ Open

## Women with STEMI, a high risk group for short-term mortality. Insights from the ATLANTIC study

|                                 |                                                                                                                                                                                                                                                                                                                                                                                                                                                                                                                                                                                                                                                                                                                                                                                                                                                                                                                       |
|---------------------------------|-----------------------------------------------------------------------------------------------------------------------------------------------------------------------------------------------------------------------------------------------------------------------------------------------------------------------------------------------------------------------------------------------------------------------------------------------------------------------------------------------------------------------------------------------------------------------------------------------------------------------------------------------------------------------------------------------------------------------------------------------------------------------------------------------------------------------------------------------------------------------------------------------------------------------|
| Journal:                        | <i>BMJ Open</i>                                                                                                                                                                                                                                                                                                                                                                                                                                                                                                                                                                                                                                                                                                                                                                                                                                                                                                       |
| Manuscript ID                   | bmjopen-2016-015241                                                                                                                                                                                                                                                                                                                                                                                                                                                                                                                                                                                                                                                                                                                                                                                                                                                                                                   |
| Article Type:                   | Research                                                                                                                                                                                                                                                                                                                                                                                                                                                                                                                                                                                                                                                                                                                                                                                                                                                                                                              |
| Date Submitted by the Author:   | 18-Nov-2016                                                                                                                                                                                                                                                                                                                                                                                                                                                                                                                                                                                                                                                                                                                                                                                                                                                                                                           |
| Complete List of Authors:       | Venetsanos, Dimitrios; Department of Medical and Health Sciences, Cardiology<br>Sederholm Lawesson, Sofia; Department of Medical and Health Sciences, Division of Cardiovascular Medicine;<br>Alfredsson, Joakim; Department of Cardiology and Department of Medical and Health Sciences, Linköping University, Linköping, Sweden<br>Janzon, magnus; Linköping University, Department of Medical and Health Sciences, Division of Cardiology<br>Cequier, Angel<br>Chettibi, Mohamed; Centre Hospito-universitaire Frantz Fanon, Blida, Algeria<br>Goodman, Shaun; Canadian Heart Research Centre, Division of Cardiology, St Michael's Hospital, University of Toronto, Toronto<br>van 't Hof, Arnoud; Isala Klinieken, Cardiology<br>Montalescot, Gilles; UPMC Sorbonne Universités, ACTION Study Group, INSERM-UMRS 1166, Institut de Cardiologie, Pitié-Salpêtrière Hospital (AP-HP) – Paris, France<br>Swahn, Eva |
| <b>Primary Subject Heading</b>: | Cardiovascular medicine                                                                                                                                                                                                                                                                                                                                                                                                                                                                                                                                                                                                                                                                                                                                                                                                                                                                                               |
| Secondary Subject Heading:      | Medical management                                                                                                                                                                                                                                                                                                                                                                                                                                                                                                                                                                                                                                                                                                                                                                                                                                                                                                    |
| Keywords:                       | Myocardial infarction < CARDIOLOGY, STEMI, gender, ticagrelor, PCI                                                                                                                                                                                                                                                                                                                                                                                                                                                                                                                                                                                                                                                                                                                                                                                                                                                    |
|                                 |                                                                                                                                                                                                                                                                                                                                                                                                                                                                                                                                                                                                                                                                                                                                                                                                                                                                                                                       |

SCHOLARONE™  
Manuscripts

1  
2  
3 **Women with STEMI, a high risk group for short-term mortality. Insights**  
4 **from the ATLANTIC study.**  
5

6 D. Venetsanos<sup>1</sup>, S. Sederholm Lawesson<sup>1</sup>, J. Alfredsson<sup>1</sup>, M. Janzon<sup>1</sup>, A. Cequier<sup>2</sup>, M.  
7 Chettibi<sup>3</sup>, S.G. Goodman<sup>4</sup>, A.W. van't Hof<sup>5</sup>, G. Montalescot<sup>6</sup>, E. Swahn<sup>1\*</sup>  
8  
9

10 <sup>1</sup>Department of Cardiology and Department of Medical and Health Sciences, Linköping  
11 University, Linköping, Sweden; <sup>2</sup>Heart Disease Institute, Hospital Universitario de Bellvitge,  
12 University of Barcelona, L'Hospitalet de Llobregat, Barcelona, Spain; <sup>3</sup>Centre Hospito-  
13 universitaire Frantz Fanon, Blida, Algeria; <sup>4</sup>Canadian Heart Research Centre, Division of  
14 Cardiology, St Michael's Hospital, University of Toronto, Toronto, Canada; <sup>5</sup>Department of  
15 Cardiology, Isala Clinics, Zwolle, Netherlands; <sup>6</sup>UPMC Sorbonne Universités, ACTION  
16 Study Group, INSERM-UMRS 1166, Institut de Cardiologie, Pitié-Salpêtrière Hospital (AP-  
17 HP) – Paris, France  
18  
19  
20  
21  
22  
23  
24  
25  
26  
27  
28  
29

30 **Keywords: myocardial infarction, STEMI, gender, primary PCI, ATLANTIC,**  
31 **ticagrelor**  
32  
33

34  
35  
36  
37 **\*Corresponding author:** Dimitrios Venetsanos, Department of Cardiology and Department  
38 of Medical and Health Sciences, Linköping University, SE 58183 Linköping, Sweden.  
39 E-mail: dimitrios.venetsanos@liu.se  
40  
41  
42  
43  
44  
45  
46  
47  
48  
49  
50  
51  
52  
53  
54  
55  
56  
57  
58  
59  
60

## Abstract

### Objectives

To evaluate gender differences in outcomes in STEMI patients treated with PPCI

### Settings

A pre-specified gender analysis of the multicenter, randomised, double-blind ATLANTIC trial

### Participants

Between September 2011 and October 2013, 1862 patients with STEMI and symptom duration less than 6 hours were included

### Interventions

Patients were assigned to pre-hospital versus in-hospital administration of 180mg ticagrelor.

### Outcomes

The main objective was to study the association between gender and primary and secondary outcomes of the main study with a focus on the clinical efficacy and safety outcomes.

Primary: The proportion of patients who did not have  $\geq 70\%$  resolution of ST segment elevation and did not meet the criteria for TIMI flow 3 at initial angiography.

Secondary: the composite of death, MI, stent thrombosis, stroke, or urgent revascularisation and major or minor bleeding at 30 days.

### Results

Women were older, had higher TIMI risk score, longer pre-hospital delays and better TIMI flow in the infarct related. Women had a 3-fold higher risk for all-cause mortality compared to men (5.7% vs 1.9%, HR 3.13, 95% CI 1.78 – 5.51). However, after adjustment for baseline characteristics, the difference was lesser and no longer significant (HR 1.98, 95% CI 0.97 – 4.04). Female gender was not an independent predictor of risk for bleeding after multivariable adjustments (PLATO major HR 1.52, 95% CI 0.76-3.03, TIMI major HR 1.41, 95% CI 0.52-3.88, BARC type 3-5 HR 1.52, 95% CI 0.74-3.09). There was no interaction between gender and efficacy or safety of randomised treatment.

### Conclusion

1  
2  
3 In STEMI patients treated with current PCI-techniques and modern antiplatelet therapy,  
4 gender differences in short term mortality and inhospital bleeds could mainly be explained by  
5 older age and clustering of comorbidities in women. Pre-hospital administration of ticagrelor  
6 had a similar efficacy and safety profile in men and women with STEMI.  
7  
8  
9

10  
11  
12 **CLINICAL TRIAL REGISTRATION:** clinicaltrials.gov identifier: NCT01347580.  
13  
14

### 15 **Strengths and limitations**

16  
17 Patients were treated according to the current guidelines of STEMI, current PCI techniques  
18 and modern antiplatelet therapy including ticagrelor in addition to aspirin as soon as possible  
19 after the first medical contact.  
20  
21  
22  
23

24 The large imbalance in the proportion of men and women included in the ATLANTIC trial,  
25 caused a reduced power for detecting significant differences in outcomes between the  
26 genders.  
27  
28  
29  
30  
31  
32  
33  
34  
35  
36  
37  
38  
39  
40  
41  
42  
43  
44  
45  
46  
47  
48  
49  
50  
51  
52  
53  
54  
55  
56  
57  
58  
59  
60

## Introduction

Recent studies have provided evidence of gender differences in the pathophysiology and the clinical expression of atherosclerosis.(1) Several registries in patients with ST-segment elevation myocardial infarction (STEMI) have consistently shown a considerably higher risk of adverse outcomes in women compared to men. Nevertheless, there are conflicting results regarding whether gender is an independent contributor to this observation or the higher risk in women depends on differences in baseline characteristics and comorbidities between genders.(2-8) Although registries of STEMI patients usually include large, unselected populations, they share some inherent limitations. Their results are certainly influenced by differences between genders in the use of timely reperfusion therapy and evidence based drug therapies as well as undetected confounding factors.(9) Therefore, reports of gender-based analyses of randomised controlled trials are of crucial importance in an effort to minimise inequality in the management and evaluate gender as a potential independent risk factor for adverse outcome. Only a few randomised trials of STEMI patients treated with primary PCI (PPCI) have reported results in the context of gender.(10, 11) New treatments (e.g. ticagrelor or prasugrel), special efforts to reduce bleeding (i.e. increased use of radial arterial access, provisional rather than routine use of glycoprotein (GP) IIb/IIIa inhibitor), shorter delay times to reperfusion and a growing awareness regarding gender differences in the management and importance of adherences to evidence based treatment could contribute to improved ischemic and bleeding outcomes in female STEMI patients.

In the ATLANTIC trial, prehospital administration of ticagrelor appeared to be safe but did not significantly improve outcome compared to in hospital administration in patients with STEMI, treated with PPCI according to the current modern standards.(12)

We present a pre-specified gender analysis of the ATLANTIC trial, with the aim of studying the association between gender and outcome.

## Methods

The ATLANTIC study was an international, randomised, double-blind, placebo-controlled study with 30 days follow-up. The design of the study, inclusion and exclusion criteria, outcome definitions and principal results have previously been described.(12, 13) Briefly, 1862 patients presenting with STEMI, less than 6 hours after symptom onset, were included and randomised to pre-hospital (in the ambulance) versus in-hospital (in the catheterisation laboratory) treatment with a loading dose of ticagrelor (180mg) in addition to aspirin and

1  
2  
3 standard clinical care. All patients were to subsequently receive ticagrelor 90 mg twice daily  
4 for 30 days, after which it was recommended that ticagrelor should be continued for up to 12  
5 months. Pre-hospital administration of a GP IIb/IIIa inhibitor was left to the physician's  
6 discretion. Peri-procedural use of parenteral anticoagulants was also left to the physician's  
7 discretion, according to the local practice.  
8  
9

10  
11 The proportion of patients who did not have  $\geq 70\%$  resolution of ST segment elevation before  
12 PCI and / or did not meet the criteria for TIMI flow 3 in the infarct related artery (IRA) at  
13 initial angiography was the primary outcome of the ATLANTIC trial. Secondary outcomes  
14 (clinical efficacy outcomes) included the composite of death, MI, stent thrombosis, stroke, or  
15 urgent revascularisation at 30 days and definite stent thrombosis at 30 days. Safety outcomes  
16 included major and minor bleeding over the 30-day treatment period. Bleeding risk was  
17 evaluated using the TIMI (The Thrombolysis In Myocardial Infarction), BARC (Bleeding  
18 Academic Research Consortium) and PLATO (Study of Platelet Inhibition and Patient  
19 Outcomes) bleeding definitions.(13)  
20  
21

22  
23 The main objective of our analysis was to study the association between gender and primary  
24 and secondary outcomes of the main study with a special focus on the clinical efficacy and  
25 safety outcomes. The interaction of gender subgroups with randomised treatment effects was  
26 also investigated.  
27  
28

29  
30 The trial design and protocol were approved by the national regulatory authorities in all the  
31 participating countries and by the local ethics committee or institutional review board at each  
32 participating site. All patients provided written informed consent.  
33  
34

### 35 36 37 38 39 40 41 42 43 **Statistical analysis**

44  
45 Continuous variables are presented by their mean and standard deviation (SD) or median and  
46 25<sup>th</sup> -75th percentiles as appropriate. Categorical variables are presented as counts and  
47 percentages. Baseline and peri-procedural characteristics were compared according to gender  
48 by chi-square tests for categorical variables and Student's t-test or Mann Whitney U test for  
49 continuous variables, depending on if the variable of interest was normally distributed or not.  
50 A p-value  $< 0.05$  is considered to indicate statistical significance.  
51  
52

53  
54 The incidence of events over time by gender is presented by Kaplan-Meier curves.  
55  
56  
57  
58  
59  
60

1  
2  
3 In order to study the association between gender and the clinical efficacy and safety  
4 outcomes, independent of randomised treatment as well as the possible interactions between  
5 gender and randomised treatment with respect to the outcomes, hazard ratios [HR] with 95%  
6 confidence intervals [CI] were derived from Cox proportional-hazards models. In the  
7 unadjusted (crude) model, gender was the only explanatory variable whereas in the adjusted  
8 multivariable model, gender was forcibly included and the other variables were chosen by  
9 using a forward stepwise selection algorithm with a significant cut-off level of 0.05 for  
10 inclusion. Adjustment variables included age, weight, prior MI, prior PCI, history of diabetes,  
11 hypertension, non-hemorrhagic stroke, gastrointestinal bleeding, time from symptom onset to  
12 pre-PCI electrocardiogram [ECG], admission Killip class (as a dichotomous variable 1 / >1),  
13 baseline hemoglobin, estimated glomerular filtration rate (eGFR) according to the MDRD  
14 formula, use of GP IIIb/IIa inhibitor and location of MI. To evaluate the importance of early  
15 mortality, a landmark analysis of the clinical efficacy outcomes was also performed from 48  
16 hours after randomisation (arbitrarily defined) to the end of the study. In order to explore the  
17 importance of bleeding on the clinical efficacy outcomes, a separate analysis was also  
18 performed by censoring the patients who reported a PLATO major bleeding at the time of the  
19 onset of a bleeding event.

20  
21 A comparable statistical process was used to compare gender differences in the effect of  
22 randomised treatment by constructing logistic regression models. Odds ratios [OR] with 95%  
23 CI are presented. The above process for Cox regression and logistic regression was also used  
24 to explore the interaction effect of gender and treatment.

25  
26 For most of the variables included in the multivariable models, only few patients had missing  
27 data (<10 patients). However, 7% of patients had missing values for creatinine, 5% for  
28 hemoglobin and 4% for Killip class. The number of patients with complete data for  
29 multivariable Cox proportional-hazard models of the primary outcome was 1613 (88%). To  
30 investigate the influence of missing values, multivariable analysis was performed before and  
31 after simple missing values imputation as well as with only gender and age as explanatory  
32 variables (because these variables had no missing values).

33  
34 All the analyses were performed using SAS<sup>®</sup> version 9.3.

## 35 36 37 38 39 40 41 42 43 44 45 46 47 48 49 50 51 52 53 54 55 56 57 58 59 60

### Baseline and peri-procedural characteristics stratified by gender



### *Demographic and clinical characteristics*

The study population consisted of 369 (20 %) women. They were older (mean age 69 vs. 59 years,  $p<0.01$ ), had lower body mass index (BMI), higher TIMI risk score, more often had a history of hypertension, chronic obstructive pulmonary disease (COPD) and stroke. Men had more frequent prior PCI. No difference was observed between genders with respect to acute heart failure (Killip class  $> 1$ ) and only a minority of patients presented with cardiogenic shock (**Table 1**).

### *Time delays*

Women had significantly longer delay times, both from symptom onset to prehospital ECG (median 88 vs 70 minutes,  $p<0.01$ ) and from pre-PCI to post-PCI angiography (median 36 vs 32 minutes,  $p=0.03$ ).

### *Procedural characteristics, angiographic findings, and medication during the index event*

Coronary angiography was more often performed by femoral access in women (39.7% vs 30.4%,  $p<0.01$ ). The genders did not differ according to IRA, with the left anterior descending artery involved in 38% of women and 39% of men. PPCI, with or without stent, was performed significantly more often in men (88.5% vs 83.7%,  $p<0.01$ ) whereas the use of drug eluting stents (DES) was similar. Thromboaspiration, GP IIb/IIIa inhibitors and intravenous anticoagulants were used less often in women. (**Table 1**)

**Table 1.** Baseline, clinical and periprocedural characteristics according to gender.

| Characteristics                            | Women (n=369)    | Men (n=1493)     | P- value |
|--------------------------------------------|------------------|------------------|----------|
| Age, years; mean (SD)                      | 69 (13.0)        | 59 (11)          | <0.01    |
| Age $\geq 75$ years                        | 153 (41.5)       | 151 (10.1)       | <0.01    |
| BMI, $\text{kg}/\text{m}^2$ ; median (IQR) | 25.6 (22.5-29.1) | 26.5 (24.3-29.4) | <0.01    |
| Prior history                              |                  |                  |          |
| Diabetes mellitus                          | 48 (13.0)        | 205 (13.7)       | 0.72     |
| Hypertension                               | 190 (51.5)       | 605 (40.5)       | <0.01    |
| Dyslipidemia                               | 117 (31.7)       | 536 (35.9)       | 0.13     |
| Angina                                     | 36 (9.8)         | 157 (10.5)       | 0.67     |

|    |                                                                        |             |             |       |
|----|------------------------------------------------------------------------|-------------|-------------|-------|
| 1  |                                                                        |             |             |       |
| 2  |                                                                        |             |             |       |
| 3  | Prior myocardial infarction                                            | 24 (6.5)    | 135 (9.0)   | 0.67  |
| 4  |                                                                        |             |             |       |
| 5  | Prior PCI                                                              | 16 (4.3)    | 124 (8.3)   | <0.01 |
| 6  |                                                                        |             |             |       |
| 7  | Prior CABG                                                             | 1 (0.3)     | 11 (0.7)    | 0.32  |
| 8  |                                                                        |             |             |       |
| 9  | Prior non-haemorrhagic stroke                                          | 8 (2.2)     | 10 (0.7)    | <0.01 |
| 10 |                                                                        |             |             |       |
| 11 | Chronic obstructive pulmonary disease                                  | 22 (6.0)    | 54 (3.6)    | 0.04  |
| 12 |                                                                        |             |             |       |
| 13 | Gastrointestinal bleeding                                              | 1 (0.3)     | 16 (1.1)    | 0.15  |
| 14 |                                                                        |             |             |       |
| 15 | Chronic renal disease                                                  | 7 (1.9)     | 27 (1.8)    | 0.91  |
| 16 | Index event information                                                |             |             |       |
| 17 | First medical contact in ambulance                                     | 280 (75.9)  | 1132 (75.8) | 0.24  |
| 18 |                                                                        |             |             |       |
| 19 | Minutes from symptom onset to pre-hospital ECG, median (IQR)           | 88 (49-169) | 70 (41-129) | <0.01 |
| 20 |                                                                        |             |             |       |
| 21 | Minutes from prehospital ECG to PCI, median (IQR)                      | 83 (68-101) | 80 (66-96)  | 0.03  |
| 22 |                                                                        |             |             |       |
| 23 | Minutes from pre-PCI angiography to post-PCI angiography, median (IQR) | 36 (24-52)  | 32 (23-45)  | 0.03  |
| 24 |                                                                        |             |             |       |
| 25 | Received first loading dose                                            | 369 (100)   | 1488 (99.7) | 0.27  |
| 26 |                                                                        |             |             |       |
| 27 | Risk level at admission                                                |             |             |       |
| 28 | Killip class                                                           |             |             |       |
| 29 |                                                                        |             |             |       |
| 30 | I                                                                      | 332 (90.0)  | 1349 (90.4) | 0.82  |
| 31 | IV                                                                     | 2 (0.5)     | 3 (0.2)     |       |
| 32 |                                                                        |             |             |       |
| 33 | TIMI risk score                                                        |             |             |       |
| 34 | 0-2                                                                    | 119 (32.2)  | 1006 (67.4) | <0.01 |
| 35 | 3-6                                                                    | 231 (62.6)  | 471 (31.5)  |       |
| 36 | >6                                                                     | 19 (5.1)    | 16 (1.1)    |       |
| 37 |                                                                        |             |             |       |
| 38 |                                                                        |             |             |       |
| 39 | Culprit vessel                                                         |             |             |       |
| 40 | Left main artery                                                       | 4 (1.1)     | 18 (1.2)    | 0.63  |
| 41 |                                                                        |             |             |       |
| 42 | Left anterior descending artery                                        | 141 (38.8)  | 571 (39.0)  |       |
| 43 |                                                                        |             |             |       |
| 44 | Right coronary artery                                                  | 150 (41.3)  | 590 (40.3)  |       |
| 45 |                                                                        |             |             |       |
| 46 | Left circumflex                                                        | 39 (10.7)   | 196 (13.4)  |       |
| 47 | No culprit vessel identified                                           | 28 (7.7)    | 85 (5.8)    |       |
| 48 |                                                                        |             |             |       |
| 49 | Normal coronary angiography                                            | 27 (7.4)    | 76 (5.2)    | 0.1   |
| 50 | Procedures for index event                                             |             |             |       |
| 51 | Femoral access                                                         | 144 (39.7)  | 445 (30.4)  | <0.01 |
| 52 |                                                                        |             |             |       |
| 53 | Thromboaspiration                                                      | 160 (43.4)  | 781 (52.3)  | <0.01 |
| 54 |                                                                        |             |             |       |
| 55 | PCI                                                                    | 309 (83.7)  | 1321 (88.5) | 0.01  |
| 56 | With any stent                                                         | 288 (78.0)  | 1248 (83.6) | 0.01  |
| 57 | With DES                                                               | 185 (50.1)  | 761 (51.0)  | 0.77  |
| 58 |                                                                        |             |             |       |
| 59 |                                                                        |             |             |       |
| 60 |                                                                        |             |             |       |

|                                                        |            |             |       |
|--------------------------------------------------------|------------|-------------|-------|
| Coronary artery bypass grafting                        | 4 (1.1)    | 21 (1.4)    | 0.63  |
| No revascularisation                                   | 56 (15.2)  | 151 (10.1)  | <0.01 |
| Any glycoprotein IIb/IIIa inhibitor use                | 115 (31.2) | 598 (40.1)  | <0.01 |
| Glycoprotein IIb/IIIa inhibitor use before angiography | 14 (3.8)   | 116 (7.8)   | <0.01 |
| Intravenous anticoagulant prior to pre-PCI angiography | 231 (62.6) | 1027 (68.8) | 0.02  |
| Intravenous anticoagulant during hospitalisation †     | 310 (84.0) | 1332 (89.2) | <0.01 |
| Heparin only                                           | 135 (36.6) | 584 (39.1)  | 0.02  |
| Bivalirudin only                                       | 29 (7.9)   | 65 (4.4)    | 0.02  |

Variables presented as numbers (percentages) unless otherwise indicated.

BMI, body mass index; CABG, coronary artery bypass grafting; DES, drug-eluting stent; IQR, interquartile range (25<sup>th</sup>–75<sup>th</sup> percentile); PCI, percutaneous coronary intervention; SD, standard deviation; TIMI, Thrombolysis In Myocardial Infarction.

† Includes all IV medications given on the date of the qualifying ECG and /or index PCI

### Association between gender and outcomes independent of randomised treatment

Female gender was associated with significantly higher risk for the composite outcome of death, MI, stroke, urgent revascularisation or definite acute stent thrombosis compared to male gender (6.8% vs 3.9%, crude HR 1.79, 95% CI 1.12 – 2.86) (**Figure 1**). This difference was mainly driven by a 3-fold higher risk for all-cause mortality in women compared to men (5.7% vs 1.9%, HR 3.13, 95% CI 1.78 – 5.51). However, in the multivariable model, the gender effect was lower and not significantly associated with the composite primary outcome (HR 1.34, 95% CI 0.77 – 2.32) or with all-cause mortality (HR 1.98, 95% CI 0.97 – 4.04) (**Figure 2 and table 2**). The age-adjusted model showed age to be the most important predictor of mortality (age-adjusted all-cause mortality, women vs men HR 1.53, 95% CI 0.82 – 2.84). Landmark analysis for events occurring within 48 hours, and between 48 hours and 30 days showed that 38% of the women and 36% of the men who did not survive the first month died within 48 hours. Comparison after excluding patients from further analysis at the time point of a PLATO major bleeding event still revealed a statistically significant association between women and all-cause mortality (4.3% vs 1.4%. HR 3.20, 95% CI 1.67 – 6.13). However, as for the whole population, this difference was no longer significant in the multivariable model (HR 1.89, 95% CI 0.81-4.44).

1  
2  
3 Female gender was associated with lower risk for TIMI flow < 3 in the IRA at initial  
4 angiography (OR 0.64, 95% CI 0.46-0.91). The risk of incomplete ST-segment elevation  
5 resolution (<70%) before PCI did not differ significantly between the genders (adjusted OR  
6 1.15, 95% CI 0.75-1.76). The risk of abnormal TIMI flow in the IRA and incomplete ST  
7 segment elevation resolution after PCI was similar in both genders (**Figure 3**).

8  
9  
10  
11 Women had significantly higher risk for major bleeding complications compared to men,  
12 irrespective of the bleeding definition used (30-day PLATO major bleeding 4.6% vs 2.2%,  
13 HR 2.15, 95% CI 1.18 – 3.85, TIMI major bleeding at 30 days 2.7% vs 0.9%, HR 2.95, 95%  
14 CI 1.31 – 6.65, BARC type 3-5 bleeding 4.3% vs 2.1%, HR 2.15, 95% CI 1.18 – 3.93)  
15 (**Figure 4**). However, after adjustment for baseline and clinical characteristics, female gender  
16 was no longer an independent predictor of risk for bleeding at 30 days. (**Table 2 and figure**  
17 **2**)

18  
19  
20 To assess whether missing values may have influenced our results, multivariable analyses for  
21 the primary, secondary and safety outcomes were performed adjusting for age and gender as  
22 the only explanatory variables; these models provided similar results (data not shown).  
23

24  
25  
26 Furthermore, multivariable analyses for the primary and secondary outcomes were performed  
27 before and after simple missing value imputation and showed similar results (data not  
28 shown).  
29  
30  
31  
32  
33  
34  
35  
36  
37  
38  
39  
40  
41  
42  
43  
44  
45  
46  
47  
48  
49  
50  
51  
52  
53

54 **Table 2** Association between gender and clinical outcomes independent of randomised treatment  
55  
56  
57  
58  
59  
60

| Outcomes                                                                              | Female (n=369)                | Male (n=1489)                 | Crude hazard ratio (95%CI)<br>(n included=1858) | Adjusted hazard ratio (95%CI)*<br>(n included=1613) | P-value * |
|---------------------------------------------------------------------------------------|-------------------------------|-------------------------------|-------------------------------------------------|-----------------------------------------------------|-----------|
|                                                                                       | Patients with endpoint, n (%) | Patients with endpoint, n (%) |                                                 |                                                     |           |
| Mortality and cardiovascular outcomes                                                 |                               |                               |                                                 |                                                     |           |
| Composite of death/MI/stroke/urgent revascularisation/definite acute stent thrombosis | 25 (6.8)                      | 58 (3.9)                      | 1.79 (1.12-2.86)                                | 1.34 (0.77-2.32)                                    | 0.30      |
| Composite of death/MI/urgent revascularisation                                        | 23 (6.2)                      | 50 (3.4)                      | 1.91 (1.17-3.13)                                | 1.32 (0.74-2.36)                                    | 0.35      |
| All-cause mortality                                                                   | 21 (5.7)                      | 28 (1.9)                      | 3.13 (1.78-5.51)                                | 1.98 (0.97-4.04)                                    | 0.06      |
| Myocardial infarction                                                                 | 3 (0.8)                       | 14 (0.9)                      | 0.90 (0.26-3.13)                                | 0.82 (0.23-2.85)                                    | 0.75      |
| Stroke                                                                                | 3 (0.8)                       | 3 (0.2)                       | 4.18 (0.84-20.70)                               | 4.14 (0.84-20.53)                                   | 0.08      |
| Urgent revascularisation                                                              | 2 (0.5)                       | 11 (0.7)                      | 0.75 (0.17-3.38)                                | 0.69 (0.15-3.11)                                    | 0.63      |
| Definite acute stent thrombosis                                                       | 3 (0.8)                       | 10 (0.7)                      | 1.23 (0.34-4.49)                                | 1.29 (0.35-4.76)                                    | 0.70      |
| Acute stent thrombosis (definite or probable)                                         | 11 (3.0)                      | 30 (2.0)                      | 1.53 (0.77-3.05)                                | 0.88 (0.39-1.98)                                    | 0.76      |
| Safety outcomes                                                                       |                               |                               |                                                 |                                                     |           |
| PLATO major bleeding **                                                               | 17 (4.6)                      | 33 (2.2)                      | 2.15 (1.20-3.85)                                | 1.52 (0.76-3.03)                                    | 0.24      |
| TIMI major bleeding **                                                                | 10 (2.7)                      | 14 (0.9)                      | 2.95 (1.31-6.65)                                | 1.41 (0.52-3.88)                                    | 0.50      |
| TIMI major or minor bleeding**                                                        | 18 (4.9)                      | 54 (3.6)                      | 1.38 (0.81-2.35)                                | 1.0 (0.54-1.86)                                     | 0.99      |

---

|                                           |          |          |                  |                  |      |
|-------------------------------------------|----------|----------|------------------|------------------|------|
| BARC type 3-5 (major) bleeding**          | 16 (4.3) | 31 (2.1) | 2.15 (1.18-3.93) | 1.52 (0.74-3.09) | 0.25 |
| BARC type 2-5 (major or minor) bleeding** | 20 (5.4) | 56 (3.8) | 1.48 (0.89-2.47) | 1.09 (0.60-1.97) | 0.78 |

\*Hazard ratio (for female versus male) and p-value calculated from logistic regression model including gender, age, weight, prior myocardial infarction, prior percutaneous coronary intervention, diabetes, hypertension, non-hemorrhagic stroke, gastrointestinal bleeding, time from symptom onset to pre-hospital ECG, admission Killip class, baseline hemoglobin, estimated glomerular filtration rate, glycoprotein IIb/IIIa inhibitor use during index procedure, location of myocardial infarction

\*\*Non-CABG related bleeding occurring up to the date of the last study visit (to the maximum of 32 days) are included in the table

BARC, Bleeding Academic Research Consortium; MI, myocardial infarction; PLATO, Study of Platelet Inhibition and Patient Outcomes; TIMI, Thrombolysis in Myocardial Infarction

---

### Association between gender and efficacy and safety of randomised treatment

Pre-hospital administration of ticagrelor compared to in-hospital administration resulted in a non-significant difference in the primary, secondary and safety outcomes. No significant interactions between randomised treatment and gender in terms of these outcomes were found in the unadjusted or adjusted model (test for interaction in the multivariable models;  $p=0.86$  for the primary outcome,  $p=0.93$  for all-cause mortality,  $p=0.19$  for absence of TIMI flow grade 3 in the IRA at initial angiography,  $p=0.71$  for absence of  $\geq 70\%$  resolution of pre-PCI ST segment elevation, and  $p=0.28$  for TIMI major bleeding at 30 days). (Supplementary tables 1, 2 and 3).

### Discussion

In the present analysis, unadjusted data showed a significantly higher risk of the composite outcome of death, MI, stroke, urgent revascularisation or definite acute stent thrombosis in women, mainly driven by a three times higher risk for short-term mortality. After multivariable adjustment female gender was not an independent predictor of worse outcome.

Undoubtedly, older age and clustering of comorbidities in women could explain a large part of the observed difference in short term clinical outcomes in our study. However, the adjusted risk for death, while not statistically significant, was still considerably higher in women, generating the hypothesis that gender could be an independent predictor of early mortality if the population of the study was larger. Any possible contribution of gender, as independent risk factor, on adverse outcome may depend on the population studied. The age gap between genders in our population was substantially higher compared to previous studies, with a mean age difference of 10 years.<sup>(11, 16)</sup> In spite of appropriate statistical methods that were used for adjustment, adjustment for such age-difference is awkward. Additionally, the age difference may indicate a selection bias. As identification and randomisation took place in the ambulance, young women with suspected STEMI were possibly not included in the study as alternative reasons for ST-segment elevation on prehospital ECG may have been considered more plausible in this group. These factors may explain the observed trend toward increased adjusted risk for early mortality in women.

1  
2  
3 A plethora of observational studies in STEMI cohorts and a meta-analysis have shown a  
4 higher risk of early mortality in women.(6, 7, 14, 15) Significant differences in the rate of  
5 reperfusion therapy between genders and hidden confounders such as frailty in elderly  
6 women with STEMI may partially explain their results. In accordance with our results,  
7 previous gender analyses of RCTs have shown that the impact of gender on mortality could  
8 mainly be explained by differences in age and comorbidities between genders.(10, 11, 16-18)  
9 In the CADILLAC study,(10) women had a 4-fold higher unadjusted risk for 30 days  
10 mortality but after adjustment no significant difference remained. In STEMI treated with  
11 thrombolysis Motovska et al showed that gender was not an independent predictor of  
12 outcome,(11) The recent PLATO trial showed concurred results but NSTEMI and STEMI  
13 patients were pooled in the gender analysis, despite the fact that the relationship between  
14 gender and outcome depends on the type of ACS.(19) Most of these studies do not reflect  
15 current treatment of STEMI patients. Despite evolving PCI techniques and novel  
16 pharmacological treatment, women still have worse short term outcome and special effort,  
17 with respect to their advanced age and comorbidities, to improve their outcomes are  
18 warranted.  
19  
20  
21  
22  
23  
24  
25  
26  
27  
28  
29

30 Some well-known gender disparities in the concomitant management of STEMI patients  
31 remained unchanged. Women were less likely to be treated with GP IIb/IIIa inhibitors and  
32 thrombo-aspiration during PPCI despite lack of gender difference in protection from major  
33 adverse outcomes by GP IIb/IIIa inhibitors (20) and benefit of thrombo-aspiration at the time  
34 when the study was conducted.(21) Similar findings have been provided by large  
35 registries.(7, 8) Some of these lower rates of utilization may be “appropriate” given the  
36 higher TIMI 3 flow rates in the IRA pre-PPCI and lower rates of PPCI in women vs. men.  
37 Furthermore, physician’s concern for higher risk of bleeding in older women with STEMI  
38 have certainly contributed to the lower use of GP IIb/IIIa inhibitors in women.  
39  
40  
41  
42  
43  
44  
45

46 Although the impact of early reperfusion on mortality in STEMI patients is now  
47 unquestionable,(22) patients’ delay from symptom onset to prehospital ECG was not an  
48 independent predictor of mortality in our study, in agreement with results from previous  
49 gender analyses.(23, 24) A plausible explanation is an association between age and delay,  
50 and thus adjustment for age minimizes the relative impact of delay. Furthermore, in PPCI,  
51 female gender has been associated with similar or even smaller infarct size than that in male  
52 gender, due to longer prehospital delays, indicating that other factors than larger infarct size  
53 secondary to longer prehospital delay mainly contribute to the observed higher unadjusted  
54  
55  
56  
57  
58  
59  
60



1  
2  
3 short term mortality.(23) The proportion of 30 day mortality that occurred within 48 hours of  
4 admission was similar in women and men (38% vs 36% respectively) contrasting previous  
5 data where gender differences in early mortality were accounted for by excess very early  
6 (within 24-48 hours) deaths in women with STEMI.(7, 25) Cardiogenic shock and  
7 hemodynamic instability were key exclusion criteria in the ATLANTIC trial which may have  
8 influenced these results. Cardiogenic shock has been shown to be more common in women  
9 and female gender has been highly associated with mortality in shock patients.(26)

10  
11 In the present study, women had a 2-3 times higher unadjusted risk for non-CABG related  
12 bleedings, depending on the definition used. After adjustment for baseline characteristics, no  
13 significant difference remained. Female gender has previously been associated with higher  
14 risk for bleeding complications in patients with ACS.(27-30) Known predictors of bleedings  
15 like advanced age, diabetes, hypertension, renal insufficiency and anemia, are usually more  
16 often encountered in women with STEMI.(31) Additionally, smaller body and vessel size,  
17 higher use of femoral access and overdosing of antithrombotic medication in women may  
18 explain the higher observed risk for bleeding. Procedural-related improvement such as  
19 increased use of radial access or smaller femoral sheaths and careful dose adjustment of  
20 antithrombotic medication, have resulted in a significant decline in the risk of  
21 bleeding/vascular complication during cardiovascular interventions the last years and have  
22 probably contributed to our results. (32)

23  
24 The negative impact of bleedings on prognosis in patients with STEMI is well established.  
25 (31) Our data showed that even after excluding patients from further analysis at the time of a  
26 PLATO major bleeding, the unadjusted HR for early mortality in women vs men remained  
27 unchanged, implying that reducing the rate of major bleeding in women may improve their  
28 prognosis but is not the main reason for the observed difference between genders in the early  
29 mortality.

30  
31 In terms of ST-segment elevation resolution and TIMI flow 3 rates before and after PCI, no  
32 significant difference between genders was observed apart from a lower risk of abnormal  
33 coronary flow in IRA at initial angiography in women. The higher rate of TIMI flow 3 at  
34 initial angiography may be explained by the higher rate of normal coronary arteries as well as  
35 the less obstructive coronary artery disease in women with STEMI, which is in concordance  
36 with previous data.(24)

1  
2  
3 The analysis of the effect of gender on outcomes dependent on the randomised treatment  
4 showed no statistically significant interactions. Pre-hospital administration of ticagrelor did  
5 not improve pre- or post-PCI coronary reperfusion as assessed by TIMI flow in IRA and  
6 resolution of ST elevation pre-PCI. Clinical efficacy outcomes were not significantly  
7 improved either. However, prehospital administration of ticagrelor was safe in both genders  
8 with similar rate of major and minor bleedings.  
9  
10  
11  
12

### 13 14 15 **Strengths and limitations**

16  
17 The present study has some important limitations. The ATLANTIC trial was not stratified by  
18 gender. The large imbalance in the proportion of men and women included, commonly  
19 encountered in a STEMI population, caused a reduced power for detecting significant  
20 differences in outcomes between the genders or to definitely exclude an interaction between  
21 gender and the randomised treatment.  
22  
23  
24

25  
26 The most important strength of our analysis is that patients were treated according to the  
27 current guidelines of STEMI, with PPCI as the reperfusion strategy of choice, administration  
28 of the modern ADP receptor-blocker ticagrelor in addition to aspirin as soon as possible after  
29 the first medical contact, high use of radial access during catheterisation and adjuvant  
30 pharmacologic treatment during PPCI with UFH or bivalirudin. (33) Therefore our study  
31 provides important information about differences and similarities between genders in STEMI  
32 patients treated with current PCI techniques and pharmacologic treatment.  
33  
34  
35  
36  
37  
38

### 39 40 **Conclusion**

41  
42 In patients with STEMI, treated with PPCI women have significantly higher mortality and  
43 bleeding complications. However, after adjustment for baseline characteristics, the observed  
44 gender differences were attenuated and no longer statistically significant, indicating that at  
45 least part of the observed difference is explained by older age and clustering of comorbidities  
46 in women. Regardless, female gender identifies a group of patients with high risk of early  
47 mortality in whom prompt efforts to improve outcome are warranted. Prehospital  
48 administration of ticagrelor had a similar efficacy and safety profile in men and women with  
49 STEMI.  
50  
51  
52  
53  
54  
55  
56  
57  
58  
59  
60

## Acknowledgements

Statistical analysis was performed by Richard Cairns from Worldwide Clinical Trials UK. The authors would like to thank all patients who took part in this study. Editorial support was provided by Liz Anfield, Prime Medica Ltd, Knutsford, Cheshire, and was funded by AstraZeneca.

## Funding statement

The main ATLANTIC trial was financed by AstraZeneca. Editorial support for this study was funded by AstraZeneca.

## Interest statement

D.V. reports that he has no relationships relevant to the contents of this paper to disclose.

S.S.L. reports that she has no relationships relevant to the contents of this paper to disclose.

J.A. reports receiving lecture fees from AstraZeneca.

M.J. reports receiving lecture fees from AstraZeneca and Sanofi.

A.C. reports that he has no relationships relevant to the contents of this paper to disclose.

M.C. reports that he has no relationships relevant to the contents of this paper to disclose.

S.G.G. reports receiving research grants and speaker/consulting honoraria from AstraZeneca, Daiichi Sankyo, Eli Lilly, Sanofi, Bristol-Myers Squibb, Merck, and The Medicines Company.

A.W. v.H. reports receiving research and educational grants from Abbott, AstraZeneca, Eli Lilly/Daiichi Sankyo, Merck/Correio, Medtronic, and The Medicines Company and speaker fees from Boehringer Ingelheim, Abbott, AstraZeneca, Eli Lilly/Daiichi Sankyo, Merck/Correio, Medtronic, The Medicines Company, Pfizer, and Sanofi.

G.M. reports receiving research grants to the Institution or consulting/lecture fees from Acuitude, ADIR, Amgen, AstraZeneca, Bayer, Berlin Chimie AG, Boehringer Ingelheim, Bristol-Myers Squibb, Brigham Women's Hospital, Cardiovascular Research Foundation, Celladon, CME resources, Daiichi-Sankyo, Eli-Lilly, Europa, Fédération Française de Cardiologie, Gilead, Hopitaux Universitaires Genève, ICAN, Janssen-Cilag, Lead-Up, Medcon International, Menarini, Medtronic, MSD, Pfizer, Recor, Sanofi-Aventis, Stentys, The Medicines Company, TIMI Study Group, Universitat Basel, WebMD, and Zoll Medical.

E. Swahn reports receiving lecture fees from AstraZeneca.

## Author's contribution

E. Swahn is responsible for the conception and design of the gender substudy of the ATLANTIC trial.

D. Venetsanos is responsible for analyses and interpretation of the data and drafted the manuscript.

1  
2  
3 S. Sederholm Lawesson, J. Alfredsson, M. Janzon, A.Cequier, M. Chettibi, S.G. Goodman, A.W. van't  
4 Hof and G. Montalescot have critically revised the manuscript and added important intellectual  
5 content.  
6

7 All authors have participated in the work and have read and approved the manuscript.  
8  
9  
10  
11  
12  
13  
14  
15  
16  
17  
18  
19  
20  
21  
22  
23  
24  
25  
26  
27  
28  
29  
30  
31  
32  
33  
34  
35  
36  
37  
38  
39  
40  
41  
42  
43  
44  
45  
46  
47  
48  
49  
50  
51  
52  
53  
54  
55  
56  
57  
58  
59  
60

For peer review only

## References

1. Bairey Merz CN, Shaw LJ, Reis SE, Bittner V, Kelsey SF, Olson M, et al. Insights from the NHLBI-Sponsored Women's Ischemia Syndrome Evaluation (WISE) Study: Part II: gender differences in presentation, diagnosis, and outcome with regard to gender-based pathophysiology of atherosclerosis and macrovascular and microvascular coronary disease. *Journal of the American College of Cardiology*. 2006 Feb 7;47(3 Suppl):S21-9. PubMed PMID: 16458167.
2. Mehta RH, Stebbins AS, Lopes RD, Califf RM, Pieper KS, Armstrong PW, et al. Comparison of incidence of bleeding and mortality of men versus women with ST-elevation myocardial infarction treated with fibrinolysis. *The American journal of cardiology*. 2012 Feb 1;109(3):320-6. PubMed PMID: 22078221.
3. Kyto V, Sipila J, Rautava P. Gender and in-hospital mortality of ST-segment elevation myocardial infarction (from a multihospital nationwide registry study of 31,689 patients). *The American journal of cardiology*. 2015 Feb 1;115(3):303-6. PubMed PMID: 25488357.
4. Jakobsen L, Niemann T, Thorsgaard N, Nielsen TT, Thuesen L, Lassen JF, et al. Sex- and age-related differences in clinical outcome after primary percutaneous coronary intervention. *EuroIntervention : journal of EuroPCR in collaboration with the Working Group on Interventional Cardiology of the European Society of Cardiology*. 2012 Dec 20;8(8):904-11. PubMed PMID: 23253544.
5. Kang SH, Suh JW, Yoon CH, Cho MC, Kim YJ, Chae SC, et al. Sex differences in management and mortality of patients with ST-elevation myocardial infarction (from the Korean Acute Myocardial Infarction National Registry). *The American journal of cardiology*. 2012 Mar 15;109(6):787-93. PubMed PMID: 22196789.
6. Lawesson SS, Alfredsson J, Fredrikson M, Swahn E. A gender perspective on short- and long term mortality in ST-elevation myocardial infarction--a report from the SWEDEHEART register. *International journal of cardiology*. 2013 Sep 30;168(2):1041-7. PubMed PMID: 23168004.
7. de Boer SP, Roos-Hesselink JW, van Leeuwen MA, Lenzen MJ, van Geuns RJ, Regar E, et al. Excess mortality in women compared to men after PCI in STEMI: an analysis of 11,931 patients during 2000-2009. *International journal of cardiology*. 2014 Sep 20;176(2):456-63. PubMed PMID: 25127966.
8. Leurent G, Garlantezec R, Auffret V, Hacot JP, Coudert I, Filippi E, et al. Gender differences in presentation, management and inhospital outcome in patients with ST-segment elevation myocardial infarction: data from 5000 patients included in the ORBI prospective French regional registry. *Archives of cardiovascular diseases*. 2014 May;107(5):291-8. PubMed PMID: 24910083.
9. Lawesson SS, Alfredsson J, Fredrikson M, Swahn E. Time trends in STEMI--improved treatment and outcome but still a gender gap: a prospective observational cohort study from the SWEDEHEART register. *BMJ open*. 2012;2(2):e000726. PubMed PMID: 22457480. Pubmed Central PMCID: 3323814.
10. Lansky AJ, Pietras C, Costa RA, Tsuchiya Y, Brodie BR, Cox DA, et al. Gender differences in outcomes after primary angioplasty versus primary stenting with and without abciximab for acute myocardial infarction: results of the Controlled Abciximab and Device Investigation to Lower Late Angioplasty Complications (CADILLAC) trial. *Circulation*. 2005 Apr 5;111(13):1611-8. PubMed PMID: 15811868.
11. Motovska Z, Widimsky P, Aschermann M, Investigators PSG. The impact of gender on outcomes of patients with ST elevation myocardial infarction transported for percutaneous coronary intervention: analysis of the PRAGUE-1 and 2 studies. *Heart*. 2008 Mar;94(3):e5. PubMed PMID: 17693459.
12. Montalescot G, van 't Hof AW, Lapostolle F, Silvain J, Lassen JF, Bolognese L, et al. Prehospital ticagrelor in ST-segment elevation myocardial infarction. *The New England journal of medicine*. 2014 Sep 11;371(11):1016-27. PubMed PMID: 25175921.

13. Montalescot G, Lassen JF, Hamm CW, Lapostolle F, Silvain J, ten Berg JM, et al. Ambulance or in-catheterization laboratory administration of ticagrelor for primary percutaneous coronary intervention for ST-segment elevation myocardial infarction: rationale and design of the randomized, double-blind Administration of Ticagrelor in the cath Lab or in the Ambulance for New ST elevation myocardial Infarction to open the Coronary artery (ATLANTIC) study. *American heart journal*. 2013 Apr;165(4):515-22. PubMed PMID: 23537967.
14. Pancholy SB, Shantha GP, Patel T, Cheskin LJ. Sex differences in short-term and long-term all-cause mortality among patients with ST-segment elevation myocardial infarction treated by primary percutaneous intervention: a meta-analysis. *JAMA internal medicine*. 2014 Nov;174(11):1822-30. PubMed PMID: 25265319.
15. Benamer H, Tafflet M, Bataille S, Escolano S, Livarek B, Fourchard V, et al. Female gender is an independent predictor of in-hospital mortality after STEMI in the era of primary PCI: insights from the greater Paris area PCI Registry. *EuroIntervention : journal of EuroPCR in collaboration with the Working Group on Interventional Cardiology of the European Society of Cardiology*. 2011 Apr;6(9):1073-9. PubMed PMID: 21518679.
16. Wijnbergen I, Tijssen J, van 't Veer M, Michels R, Pijls NH. Gender differences in long-term outcome after primary percutaneous intervention for ST-segment elevation myocardial infarction. *Catheterization and cardiovascular interventions : official journal of the Society for Cardiac Angiography & Interventions*. 2013 Sep 1;82(3):379-84. PubMed PMID: 23553888.
17. Husted S, James SK, Bach RG, Becker RC, Budaj A, Heras M, et al. The efficacy of ticagrelor is maintained in women with acute coronary syndromes participating in the prospective, randomized, PLATElet inhibition and patient Outcomes (PLATO) trial. *European heart journal*. 2014 Jun 14;35(23):1541-50. PubMed PMID: 24682844. Pubmed Central PMCID: 4057642.
18. De Luca G, Gibson CM, Gyongyosi M, Zeymer U, Dudek D, Arntz HR, et al. Gender-related differences in outcome after ST-segment elevation myocardial infarction treated by primary angioplasty and glycoprotein IIb/IIIa inhibitors: insights from the EGYPT cooperation. *Journal of thrombosis and thrombolysis*. 2010 Oct;30(3):342-6. PubMed PMID: 20213259.
19. Champney KP, Frederick PD, Bueno H, Parashar S, Foody J, Merz CN, et al. The joint contribution of sex, age and type of myocardial infarction on hospital mortality following acute myocardial infarction. *Heart*. 2009 Jun;95(11):895-9. PubMed PMID: 19147625. Pubmed Central PMCID: 3065924.
20. Cho L, Topol EJ, Balog C, Foody JM, Booth JE, Cabot C, et al. Clinical benefit of glycoprotein IIb/IIIa blockade with Abciximab is independent of gender: pooled analysis from EPIC, EPILOG and EPISTENT trials. *Evaluation of 7E3 for the Prevention of Ischemic Complications. Evaluation in Percutaneous Transluminal Coronary Angioplasty to Improve Long-Term Outcome with Abciximab GP IIb/IIIa blockade. Evaluation of Platelet IIb/IIIa Inhibitor for Stent*. *Journal of the American College of Cardiology*. 2000 Aug;36(2):381-6. PubMed PMID: 10933346.
21. Vlaar PJ, Svilaas T, van der Horst IC, Diercks GF, Fokkema ML, de Smet BJ, et al. Cardiac death and reinfarction after 1 year in the Thrombus Aspiration during Percutaneous coronary intervention in Acute myocardial infarction Study (TAPAS): a 1-year follow-up study. *Lancet*. 2008 Jun 7;371(9628):1915-20. PubMed PMID: 18539223.
22. De Luca G, Suryapranata H, Ottervanger JP, Antman EM. Time delay to treatment and mortality in primary angioplasty for acute myocardial infarction: every minute of delay counts. *Circulation*. 2004 Mar 16;109(10):1223-5. PubMed PMID: 15007008.
23. Sadowski M, Gasior M, Gierlotka M, Janion M, Polonski L. Gender-related differences in mortality after ST-segment elevation myocardial infarction: a large multicentre national registry. *EuroIntervention : journal of EuroPCR in collaboration with the Working Group on Interventional Cardiology of the European Society of Cardiology*. 2011 Apr;6(9):1068-72. PubMed PMID: 21518678.
24. Otten AM, Maas AH, Ottervanger JP, Kloosterman A, van 't Hof AW, Dambrink JH, et al. Is the difference in outcome between men and women treated by primary percutaneous coronary intervention age dependent? Gender difference in STEMI stratified on age. *European heart*



1  
2  
3 journal Acute cardiovascular care. 2013 Dec;2(4):334-41. PubMed PMID: 24338292. Pubmed Central  
4 PMCID: 3821825.

5 25. Jneid H, Fonarow GC, Cannon CP, Hernandez AF, Palacios IF, Maree AO, et al. Sex  
6 differences in medical care and early death after acute myocardial infarction. *Circulation*. 2008 Dec  
7 16;118(25):2803-10. PubMed PMID: 19064680.

8 26. Suessenbacher A, Doerler J, Alber H, Aichinger J, Altenberger J, Benzer W, et al.  
9 Gender-related outcome following percutaneous coronary intervention for ST-elevation myocardial  
10 infarction: data from the Austrian acute PCI registry. *EuroIntervention : journal of EuroPCR in*  
11 *collaboration with the Working Group on Interventional Cardiology of the European Society of*  
12 *Cardiology*. 2008 Aug;4(2):271-6. PubMed PMID: 19110794.

13 27. Steg PG, Huber K, Andreotti F, Arnesen H, Atar D, Badimon L, et al. Bleeding in acute  
14 coronary syndromes and percutaneous coronary interventions: position paper by the Working  
15 Group on Thrombosis of the European Society of Cardiology. *European heart journal*. 2011  
16 Aug;32(15):1854-64. PubMed PMID: 21715717.

17 28. Mehran R, Pocock SJ, Nikolsky E, Clayton T, Dangas GD, Kirtane AJ, et al. A risk score to  
18 predict bleeding in patients with acute coronary syndromes. *Journal of the American College of*  
19 *Cardiology*. 2010 Jun 8;55(23):2556-66. PubMed PMID: 20513595.

20 29. Becker RC, Bassand JP, Budaj A, Wojdyla DM, James SK, Cornel JH, et al. Bleeding  
21 complications with the P2Y12 receptor antagonists clopidogrel and ticagrelor in the PLATelet  
22 inhibition and patient Outcomes (PLATO) trial. *European heart journal*. 2011 Dec;32(23):2933-44.  
23 PubMed PMID: 22090660.

24 30. Mathews R, Peterson ED, Chen AY, Wang TY, Chin CT, Fonarow GC, et al. In-hospital  
25 major bleeding during ST-elevation and non-ST-elevation myocardial infarction care: derivation and  
26 validation of a model from the ACTION Registry(R)-GWTG. *The American journal of cardiology*. 2011  
27 Apr 15;107(8):1136-43. PubMed PMID: 21324428.

28 31. Manoukian SV, Feit F, Mehran R, Voeltz MD, Ebrahimi R, Hamon M, et al. Impact of  
29 major bleeding on 30-day mortality and clinical outcomes in patients with acute coronary  
30 syndromes: an analysis from the ACUITY Trial. *Journal of the American College of Cardiology*. 2007  
31 Mar 27;49(12):1362-8. PubMed PMID: 17394970.

32 32. Ahmed B, Piper WD, Malenka D, VerLee P, Robb J, Ryan T, et al. Significantly improved  
33 vascular complications among women undergoing percutaneous coronary intervention: a report  
34 from the Northern New England Percutaneous Coronary Intervention Registry. *Circulation*  
35 *Cardiovascular interventions*. 2009 Oct;2(5):423-9. PubMed PMID: 20031752.

36 33. Wessler JD, Stant J, Duru S, Rabbani L, Kirtane AJ. Updates to the ACCF/AHA and ESC  
37 STEMI and NSTEMI guidelines: putting guidelines into clinical practice. *The American journal of*  
38 *cardiology*. 2015 Mar 14;115(5 Suppl):23A-8A. PubMed PMID: 25728971.

1  
2  
3  
4  
5  
6  
7  
8  
9  
10  
11  
12  
13  
14  
15  
16  
17  
18  
19  
20  
21  
22  
23  
24  
25  
26  
27  
28  
29  
30  
31  
32  
33  
34  
35  
36  
37  
38  
39  
40  
41  
42  
43  
44  
45  
46  
47  
48  
49  
50  
51  
52  
53  
54  
55  
56  
57  
58  
59  
60

For peer review only



1  
2  
3  
4  
5  
6  
7  
8  
9  
10  
11  
12  
13  
14  
15  
16  
17  
18  
19  
20  
21  
22  
23  
24  
25  
26  
27  
28  
29  
30  
31  
32  
33  
34  
35  
36  
37  
38  
39  
40  
41  
42  
43  
44  
45  
46  
47  
48  
49  
50  
51  
52  
53  
54  
55  
56  
57  
58  
59  
60

For peer review only

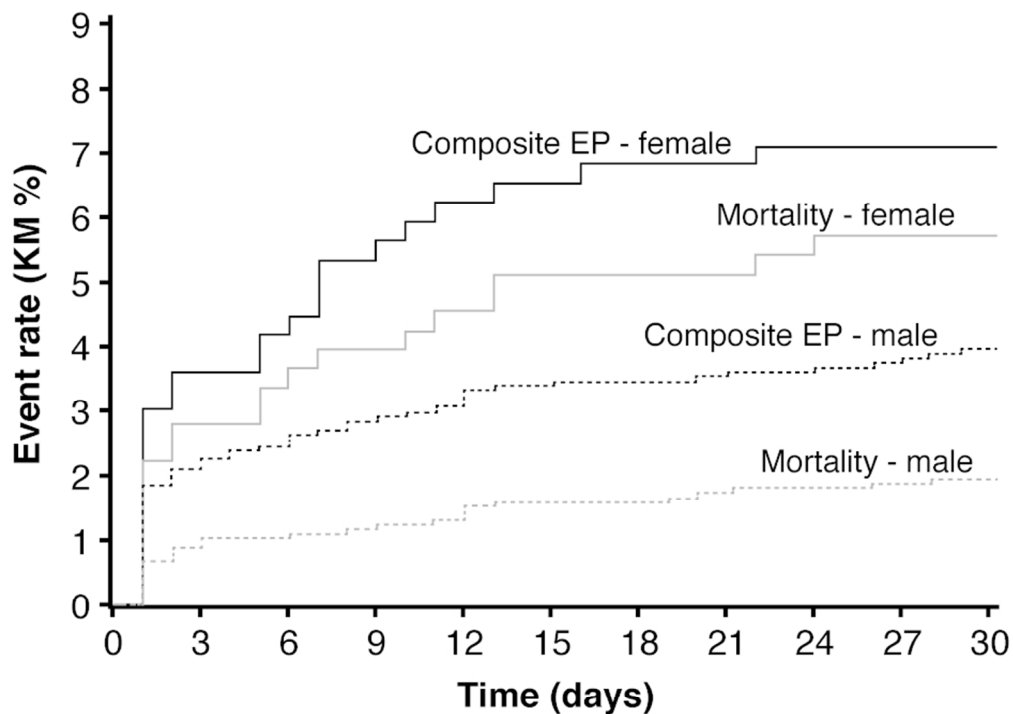

| Composite endpoint   | All-cause mortality  |
|----------------------|----------------------|
| Female 25/369 (6.8%) | Female 21/369 (5.7%) |
| Male 58/1489 (3.9%)  | Male 28/1489 (1.9%)  |

Figure 1. Cumulative Kaplan-Meier estimates of the incidence of the composite endpoint of death, MI, stroke, urgent revascularisation or definite acute stent thrombosis and all-cause mortality at 30 days by gender.

79x70mm (300 x 300 DPI)

only

1  
2  
3  
4  
5  
6  
7  
8  
9  
10  
11  
12  
13  
14  
15  
16  
17  
18  
19  
20  
21  
22  
23  
24  
25  
26  
27  
28  
29  
30  
31  
32  
33  
34  
35  
36  
37  
38  
39  
40  
41  
42  
43  
44  
45  
46  
47  
48  
49  
50  
51  
52  
53  
54  
55  
56  
57  
58  
59  
60

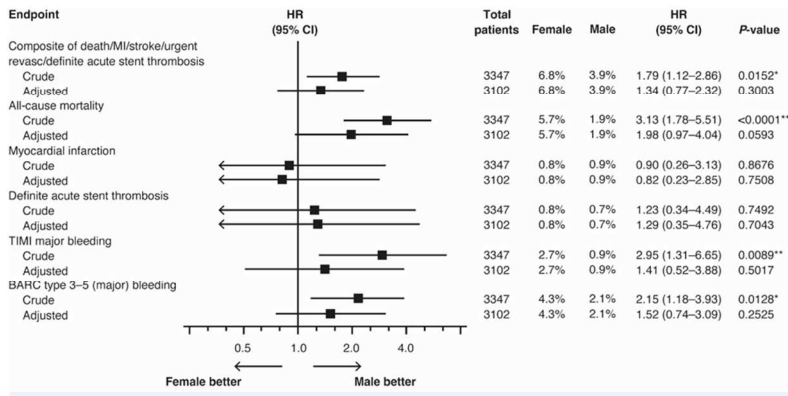

Figure 2. Association between gender and clinical outcomes independent of randomised treatment.

338x190mm (96 x 96 DPI)

review only

1  
2  
3  
4  
5  
6  
7  
8  
9  
10  
11  
12  
13  
14  
15  
16  
17  
18  
19  
20  
21  
22  
23  
24  
25  
26  
27  
28  
29  
30  
31  
32  
33  
34  
35  
36  
37  
38  
39  
40  
41  
42  
43  
44  
45  
46  
47  
48  
49  
50  
51  
52  
53  
54  
55  
56  
57  
58  
59  
60

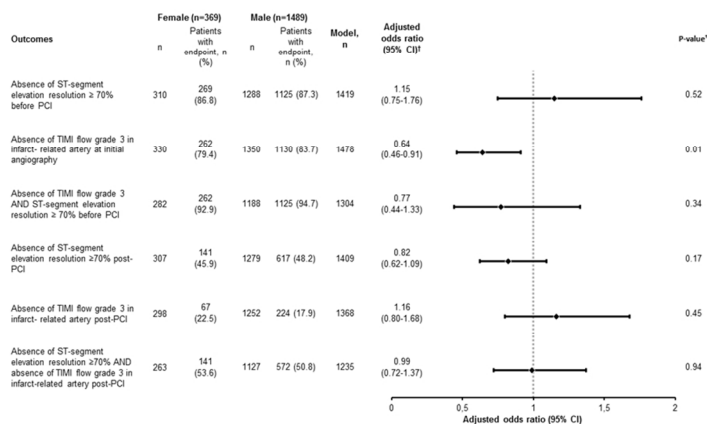

Figure 3. †Odds ratio (for female versus male) and p-value calculated from logistic regression model including gender, age, weight, prior myocardial infarction, prior percutaneous coronary intervention, diabetes, hypertension, non-haemorrhagic stroke, gastrointestinal bleeding, time from symptom onset to pre-hospital ECG, admission Killip class, baseline haemoglobin, estimated glomerular filtration rate, glycoprotein Iib/IIIa inhibitor use during index procedure, location of myocardial infarction

338x190mm (96 x 96 DPI)

view only

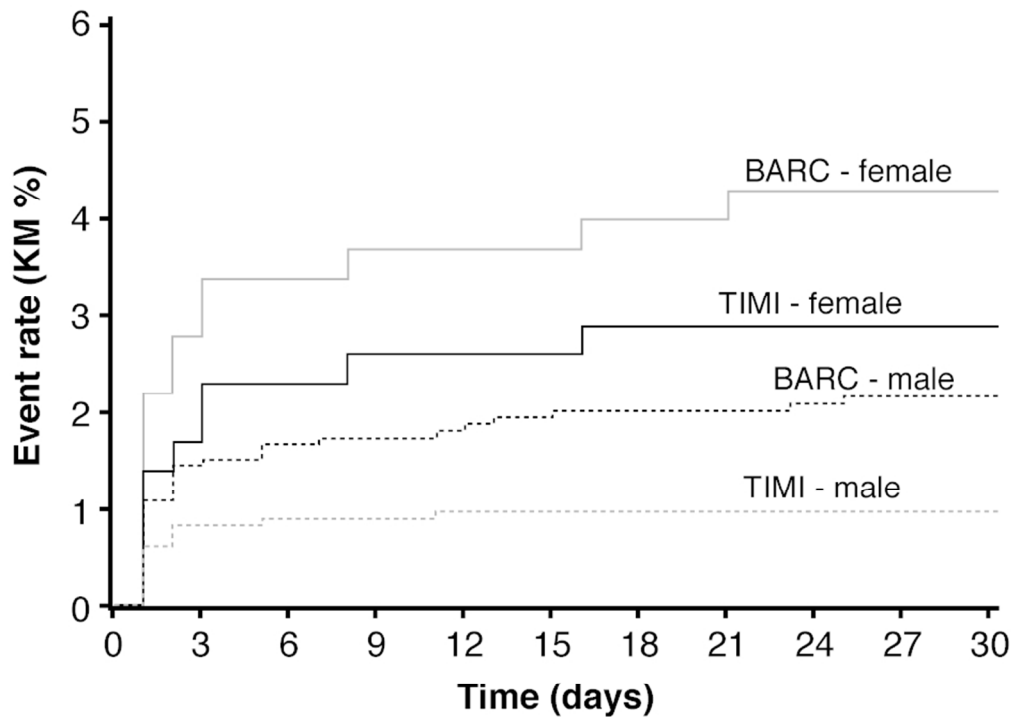

|                         |                            |
|-------------------------|----------------------------|
| <b>TIMI major bleed</b> | <b>BARC type 3–5 bleed</b> |
| Female 10/369 (2.7%)    | Female 16/369 (4.3%)       |
| Male 14/1489 (0.9%)     | Male 31/1489 (2.1%)        |

Figure 4. Cumulative Kaplan-Meier estimates of the incidence of the TIMI major bleeding and BARC type 3-5 bleeding at 30 days by gender.

79x69mm (300 x 300 DPI)

only

**Supplementary table 1** Association between gender and efficacy of randomised treatment – clinical outcomes

| Outcomes                                                                   | Gender | Pre-hospital ticagrelor (n=906) |                               | In-hospital ticagrelor (n=952) |                               | Model, n | Adjusted hazard ratio ≠ (95% CI) | P-value (interaction) ≠ |
|----------------------------------------------------------------------------|--------|---------------------------------|-------------------------------|--------------------------------|-------------------------------|----------|----------------------------------|-------------------------|
|                                                                            |        | N                               | Patients with endpoint, n (%) | N                              | Patients with endpoint, n (%) |          |                                  |                         |
| Composite of Death/MI/Stroke/Urgent Revasc/Definite Acute Stent Thrombosis | Female | 173                             | 13 (7.5)                      | 196                            | 12 (6.1)                      | 1613     | 0.98 (0.42-2.27)                 | 0.87                    |
|                                                                            | Male   | 733                             | 28 (3.8)                      | 756                            | 30 (4.0)                      |          | 0.90 (0.51-1.59)                 |                         |
| Composite of Death/MI/Urgent Revasc                                        | Female | 173                             | 13 (7.5)                      | 196                            | 10 (5.1)                      | 1613     | 1.32 (0.55-3.20)                 | 0.55                    |
|                                                                            | Male   | 733                             | 26 (3.5)                      | 756                            | 24 (3.2)                      |          | 0.95 (0.52-1.76)                 |                         |
| All-cause mortality                                                        | Female | 173                             | 13 (7.5)                      | 196                            | 8 (4.1)                       | 1613     | 1.59 (0.61-4.12)                 | 0.93                    |
|                                                                            | Male   | 733                             | 17 (2.3)                      | 756                            | 11 (1.5)                      |          | 1.50 (0.60-3.74)                 |                         |
| Myocardial infarction                                                      | Female | 173                             | 1 (0.6)                       | 196                            | 2 (1.0)                       | 1613     | 0.44 (0.04-4.95)                 | 0.72                    |
|                                                                            | Male   | 733                             | 6 (0.8)                       | 756                            | 8 (1.1)                       |          | 0.72 (0.25-2.09)                 |                         |
| Stroke                                                                     | Female | 173                             | 1 (0.6)                       | 196                            | 2 (1.0)                       | 1613     | 0.54 (0.05-5.90)                 | 0.99                    |
|                                                                            | Male   | 733                             | 3 (0.4)                       | 756                            | 0 (0.0)                       |          | Nt estimated                     |                         |
| Urgent revascularization                                                   | Female | 173                             | 1 (0.6)                       | 196                            | 1 (0.5)                       | 1613     | 0.86 (0.05-14.07)                | 0.76                    |
|                                                                            | Male   | 733                             | 4 (0.5)                       | 756                            | 7 (0.9)                       |          | 0.54 (0.15-1.87)                 |                         |
| Definite Acute Stent Thrombosis                                            | Female | 173                             | 1 (0.6)                       | 196                            | 2 (1.0)                       | 1613     | 0.37 (0.03-4.27)                 | 0.49                    |
|                                                                            | Male   | 733                             | 1 (0.1)                       | 756                            | 9 (1.2)                       |          | 0.12 (0.01-1.02)                 |                         |
| Acute Stent Thrombosis (definite or probable)                              | Female | 173                             | 7 (4.0)                       | 196                            | 4 (2.0)                       | 1613     | 1.31 (0.37-4.69)                 | 0.52                    |
|                                                                            | Male   | 733                             | 14 (1.9)                      | 756                            | 16 (2.1)                      |          | 0.80 (0.35-1.80)                 |                         |

1  
2  
3  
4  
5  
6  
7  
8  
9  
10  
11  
12  
13  
14  
15  
16  
17  
18  
19  
20  
21  
22  
23  
24  
25  
26  
27  
28  
29  
30  
31  
32  
33  
34  
35  
36  
37  
38  
39  
40  
41  
42  
43  
44  
45  
46  
47  
48  
49  
50  
51  
52  
53  
54  
55  
56  
57  
58  
59  
60

≠ Adjusted hazard (for female versus male) and p-values for interaction was calculated from Cox proportional hazard model including gender, age, weight, prior myocardial infarction, prior percutaneous coronary intervention, diabetes, hypertension, non-hemorrhagic stroke, gastrointestinal bleeding, time from symptom onset to pre-hospital ECG, admission Killip class, baseline hemoglobin, estimated glomerular filtration rate, glycoprotein IIb/IIIa inhibitor use during index procedure, location of myocardial infarction

For peer review only

**Supplementary table 2** Association between gender and efficacy of randomised treatment – primary and secondary outcomes

| Outcomes                                                                                                   | Gender | Pre-hospital ticagrelor (n=906) |                               | In-hospital ticagrelor (n=952) |                               | Model N ≠ | Adjusted odds ratio ≠ (95% CI) | P-value (interaction) ≠ |
|------------------------------------------------------------------------------------------------------------|--------|---------------------------------|-------------------------------|--------------------------------|-------------------------------|-----------|--------------------------------|-------------------------|
|                                                                                                            |        | N                               | Patients with endpoint, n (%) | N                              | Patients with endpoint, n (%) |           |                                |                         |
| Absence of ST segment elevation resolution ≥ 70% pre-PCI                                                   | Female | 142                             | 122 (85.9)                    | 168                            | 147 (87.5)                    | 1419      | 0.75 (0.37-1.53)               | 0.71                    |
|                                                                                                            | Male   | 632                             | 550 (87.0)                    | 656                            | 575 (87.7)                    |           | 0.85 (0.59-1.23)               |                         |
| Absence of TIMI flow grade 3 in infarct related artery at initial angiography                              | Female | 155                             | 127 (81.9)                    | 175                            | 135 (77.1)                    | 1478      | 1.36 (0.76-2.41)               | 0.19                    |
|                                                                                                            | Male   | 669                             | 554 (82.8)                    | 681                            | 576 (84.6)                    |           | 0.88 (0.64-1.20)               |                         |
| Absence of ST segment resolution ≥ 70% AND absence of TIMI flow grade 3 in infarct related artery pre-PCI  | Female | 129                             | 120 (93.0)                    | 153                            | 142 (92.8)                    | 1304      | 1.07 (0.41-2.81)               | 0.84                    |
|                                                                                                            | Male   | 590                             | 557 (94.4)                    | 598                            | 568 (95.0)                    |           | 0.96 (0.57-1.62)               |                         |
| Absence of ST-segment resolution ≥70% after PCI                                                            | Female | 144                             | 61 (42.4)                     | 163                            | 80 (49.1)                     | 1409      | 0.76 (0.47-1.25)               | 0.51                    |
|                                                                                                            | Male   | 629                             | 291 (46.3)                    | 650                            | 326 (50.2)                    |           | 0.92 (0.72-1.17)               |                         |
| Absence of TIMI flow grade 3 in infarct related artery after PCI                                           | Female | 144                             | 30 (20.8)                     | 154                            | 37 (24.0)                     | 1368      | 0.93 (0.51-1.71)               | 0.98                    |
|                                                                                                            | Male   | 621                             | 107 (17.2)                    | 631                            | 117 (18.5)                    |           | 0.92 (0.68-1.26)               |                         |
| Absence of ST segment resolution ≥70% AND absence of TIMI flow grade 3 in infarct related artery after PCI | Female | 125                             | 60 (48.0)                     | 138                            | 81 (58.7)                     | 1235      | 0.64 (0.38-1.10)               | 0.13                    |
|                                                                                                            | Male   | 562                             | 282 (50.2)                    | 565                            | 290 (51.3)                    |           | 1.01 (0.78-1.32)               |                         |



1  
2  
3     ≠ Adjusted odds ratio (for female versus male) and p-values for interaction was calculated from  
4     logistic regression model including gender, age, weight, prior myocardial infarction, prior  
5     percutaneous coronary intervention, diabetes, hypertension, non-hemorrhagic stroke,  
6     gastrointestinal bleeding, time from symptom onset to pre-hospital ECG, admission Killip class,  
7     baseline hemoglobin, estimated glomerular filtration rate, glycoprotein IIb/IIIa inhibitor use during  
8     index procedure, location of myocardial infarction  
9

10  
11  
12  
13  
14  
15  
16  
17  
18  
19  
20  
21  
22  
23  
24  
25  
26  
27  
28  
29  
30  
31  
32  
33  
34  
35  
36  
37  
38  
39  
40  
41  
42  
43  
44  
45  
46  
47  
48  
49  
50  
51  
52  
53  
54  
55  
56  
57  
58  
59  
60

For peer review only

**Supplementary table 3** Association between gender and safety of randomised treatment (safety outcomes)

| End point                                | Gender | Pre-hospital ticagrelor (n=906) |                               | In-hospital ticagrelor (n=952) |                               | Model N ≠ | Adjusted hazard ratio ≠ (95% CI) | P-value (interaction) ≠ |
|------------------------------------------|--------|---------------------------------|-------------------------------|--------------------------------|-------------------------------|-----------|----------------------------------|-------------------------|
|                                          |        | N                               | Patients with endpoint, n (%) | N                              | Patients with endpoint, n (%) |           |                                  |                         |
| PLATO major bleeding                     | Female | 173                             | 6 (3.5)                       | 196                            | 11 (5.6)                      | 1613      | 0.61 (0.21-1.83)                 | 0.23                    |
|                                          | Male   | 733                             | 19 (2.6)                      | 756                            | 14 (1.9)                      |           | 1.39 (0.66-2.93)                 |                         |
| PLATO major and minor bleeding           | Female | 173                             | 7 (4.0)                       | 196                            | 13 (6.6)                      | 1613      | 0.59 (0.22-1.61)                 | 0.19                    |
|                                          | Male   | 733                             | 33 (4.5)                      | 756                            | 26 (3.4)                      |           | 1.27 (0.73-2.21)                 |                         |
| TIMI major bleeding                      | Female | 173                             | 3 (1.7)                       | 196                            | 7 (3.6)                       | 1613      | 0.60 (0.14-2.54)                 | 0.28                    |
|                                          | Male   | 733                             | 9 (1.2)                       | 756                            | 5 (0.7)                       |           | 1.62 (0.53-4.98)                 |                         |
| TIMI major and minor bleeding            | Female | 173                             | 6 (3.5)                       | 196                            | 12 (6.1)                      | 1613      | 0.55 (0.19-1.60)                 | 0.24                    |
|                                          | Male   | 733                             | 29 (4.0)                      | 756                            | 25 (3.3)                      |           | 1.14 (0.64-2.03)                 |                         |
| BARC type 3-5 (major) bleeding           | Female | 173                             | 6 (3.5)                       | 196                            | 10 (5.1)                      | 1613      | 0.69 (0.23-2.11)                 | 0.26                    |
|                                          | Male   | 733                             | 18 (2.5)                      | 756                            | 13 (1.7)                      |           | 1.51 (0.70-3.26)                 |                         |
| BARC type 2-5 (major and minor) bleeding | Female | 173                             | 7 (4.0)                       | 196                            | 13 (6.6)                      | 1613      | 0.59 (0.22-1.60)                 | 0.21                    |
|                                          | Male   | 733                             | 31 (4.2)                      | 756                            | 25 (3.3)                      |           | 1.23 (0.70-2.17)                 |                         |

1  
2  
3 #Adjusted hazard (for female versus male) and p-values for interaction was calculated from Cox  
4 proportional hazard model including gender, age, weight, prior myocardial infarction, prior  
5 percutaneous coronary intervention, diabetes, hypertension, non-hemorrhagic stroke,  
6 gastrointestinal bleeding, time from symptom onset to pre-hospital ECG, admission Killip class,  
7 baseline hemoglobin, estimated glomerular filtration rate, glycoprotein IIb/IIIa inhibitor use during  
8 index procedure, location of myocardial infarction  
9

10  
11  
12  
13  
14  
15  
16  
17  
18  
19  
20  
21  
22  
23  
24  
25  
26  
27  
28  
29  
30  
31  
32  
33  
34  
35  
36  
37  
38  
39  
40  
41  
42  
43  
44  
45  
46  
47  
48  
49  
50  
51  
52  
53  
54  
55  
56  
57  
58  
59  
60

For peer review only

STROBE 2007 (v4) Statement—Checklist of items that should be included in reports of *cohort studies*

| Section/Topic                | Item # | Recommendation                                                                                                                                                                       | Reported on page # |
|------------------------------|--------|--------------------------------------------------------------------------------------------------------------------------------------------------------------------------------------|--------------------|
| Title and abstract           | 1      | (a) Indicate the study's design with a commonly used term in the title or the abstract                                                                                               | 2                  |
|                              |        | (b) Provide in the abstract an informative and balanced summary of what was done and what was found                                                                                  | 2                  |
| <b>Introduction</b>          |        |                                                                                                                                                                                      |                    |
| Background/rationale         | 2      | Explain the scientific background and rationale for the investigation being reported                                                                                                 | 4                  |
| Objectives                   | 3      | State specific objectives, including any prespecified hypotheses                                                                                                                     | 4                  |
| <b>Methods</b>               |        |                                                                                                                                                                                      |                    |
| Study design                 | 4      | Present key elements of study design early in the paper                                                                                                                              | 4,5                |
| Setting                      | 5      | Describe the setting, locations, and relevant dates, including periods of recruitment, exposure, follow-up, and data collection                                                      | 4,5                |
| Participants                 | 6      | (a) Give the eligibility criteria, and the sources and methods of selection of participants. Describe methods of follow-up                                                           | 4,5                |
|                              |        | (b) For matched studies, give matching criteria and number of exposed and unexposed                                                                                                  | NA                 |
| Variables                    | 7      | Clearly define all outcomes, exposures, predictors, potential confounders, and effect modifiers. Give diagnostic criteria, if applicable                                             | 5                  |
| Data sources/<br>measurement | 8*     | For each variable of interest, give sources of data and details of methods of assessment (measurement). Describe comparability of assessment methods if there is more than one group | 5                  |
| Bias                         | 9      | Describe any efforts to address potential sources of bias                                                                                                                            | 5,6                |
| Study size                   | 10     | Explain how the study size was arrived at                                                                                                                                            | N/A                |
| Quantitative variables       | 11     | Explain how quantitative variables were handled in the analyses. If applicable, describe which groupings were chosen and why                                                         | 5,6                |
| Statistical methods          | 12     | (a) Describe all statistical methods, including those used to control for confounding                                                                                                | 5, 6               |
|                              |        | (b) Describe any methods used to examine subgroups and interactions                                                                                                                  | 5, 6               |
|                              |        | (c) Explain how missing data were addressed                                                                                                                                          | 6                  |
|                              |        | (d) If applicable, explain how loss to follow-up was addressed                                                                                                                       | N/A                |
|                              |        | (e) Describe any sensitivity analyses                                                                                                                                                | 6                  |
| <b>Results</b>               |        |                                                                                                                                                                                      |                    |

|                          |     |                                                                                                                                                                                                                                                                                                                                                                                                               |                          |
|--------------------------|-----|---------------------------------------------------------------------------------------------------------------------------------------------------------------------------------------------------------------------------------------------------------------------------------------------------------------------------------------------------------------------------------------------------------------|--------------------------|
| Participants             | 13* | (a) Report numbers of individuals at each stage of study—eg numbers potentially eligible, examined for eligibility, confirmed eligible, included in the study, completing follow-up, and analysed<br>(b) Give reasons for non-participation at each stage<br>(c) Consider use of a flow diagram                                                                                                               | 4<br><br>NA (SEE PAGE 4) |
| Descriptive data         | 14* | (a) Give characteristics of study participants (eg demographic, clinical, social) and information on exposures and potential confounders<br>(b) Indicate number of participants with missing data for each variable of interest<br>(c) Summarise follow-up time (eg, average and total amount)                                                                                                                | 7, 8, 9<br>6<br>NA       |
| Outcome data             | 15* | Report numbers of outcome events or summary measures over time                                                                                                                                                                                                                                                                                                                                                | 9, 10, 11, 12            |
| Main results             | 16  | (a) Give unadjusted estimates and, if applicable, confounder-adjusted estimates and their precision (eg, 95% confidence interval). Make clear which confounders were adjusted for and why they were included<br>(b) Report category boundaries when continuous variables were categorized<br>(c) If relevant, consider translating estimates of relative risk into absolute risk for a meaningful time period | 9, 10, 11, 12<br>yes     |
| Other analyses           | 17  | Report other analyses done—eg analyses of subgroups and interactions, and sensitivity analyses                                                                                                                                                                                                                                                                                                                | 10                       |
| <b>Discussion</b>        |     |                                                                                                                                                                                                                                                                                                                                                                                                               |                          |
| Key results              | 18  | Summarise key results with reference to study objectives                                                                                                                                                                                                                                                                                                                                                      | 13, 14                   |
| <b>Limitations</b>       |     |                                                                                                                                                                                                                                                                                                                                                                                                               |                          |
| Interpretation           | 20  | Give a cautious overall interpretation of results considering objectives, limitations, multiplicity of analyses, results from similar studies, and other relevant evidence                                                                                                                                                                                                                                    | 13, 14                   |
| Generalisability         | 21  | Discuss the generalisability (external validity) of the study results                                                                                                                                                                                                                                                                                                                                         | NA                       |
| <b>Other information</b> |     |                                                                                                                                                                                                                                                                                                                                                                                                               |                          |
| Funding                  | 22  | Give the source of funding and the role of the funders for the present study and, if applicable, for the original study on which the present article is based                                                                                                                                                                                                                                                 | 17                       |

\*Give information separately for cases and controls in case-control studies and, if applicable, for exposed and unexposed groups in cohort and cross-sectional studies.

**Note:** An Explanation and Elaboration article discusses each checklist item and gives methodological background and published examples of transparent reporting. The STROBE checklist is best used in conjunction with this article (freely available on the Web sites of PLoS Medicine at <http://www.plosmedicine.org/>, Annals of Internal Medicine at <http://www.annals.org/>, and Epidemiology at <http://www.epidem.com/>). Information on the STROBE Initiative is available at [www.strobe-statement.org](http://www.strobe-statement.org).

# BMJ Open

## Association between gender and short term outcome in STEMI patients planned for primary PCI and novel antiplatelet therapy.

**A pre-specified gender analysis of the Administration of Ticagrelor in the Cath Lab or in the Ambulance for New ST Elevation Myocardial Infarction to Open the Coronary Artery (ATLANTIC) trial – a multicenter, randomised, placebo-controlled study.**

|                                 |                                                                                                                                                                                                                                                                                                                                                                                                                                                                                                                                                                                                                                                                                                                                                                                                                                                                                                                       |
|---------------------------------|-----------------------------------------------------------------------------------------------------------------------------------------------------------------------------------------------------------------------------------------------------------------------------------------------------------------------------------------------------------------------------------------------------------------------------------------------------------------------------------------------------------------------------------------------------------------------------------------------------------------------------------------------------------------------------------------------------------------------------------------------------------------------------------------------------------------------------------------------------------------------------------------------------------------------|
| Journal:                        | <i>BMJ Open</i>                                                                                                                                                                                                                                                                                                                                                                                                                                                                                                                                                                                                                                                                                                                                                                                                                                                                                                       |
| Manuscript ID                   | bmjopen-2016-015241.R1                                                                                                                                                                                                                                                                                                                                                                                                                                                                                                                                                                                                                                                                                                                                                                                                                                                                                                |
| Article Type:                   | Research                                                                                                                                                                                                                                                                                                                                                                                                                                                                                                                                                                                                                                                                                                                                                                                                                                                                                                              |
| Date Submitted by the Author:   | 21-Jan-2017                                                                                                                                                                                                                                                                                                                                                                                                                                                                                                                                                                                                                                                                                                                                                                                                                                                                                                           |
| Complete List of Authors:       | Venetsanos, Dimitrios; Department of Medical and Health Sciences, Cardiology<br>Sederholm Lawesson, Sofia; Department of Medical and Health Sciences, Division of Cardiovascular Medicine;<br>Alfredsson, Joakim; Department of Cardiology and Department of Medical and Health Sciences, Linköping University, Linköping, Sweden<br>Janzon, magnus; Linköping University, Department of Medical and Health Sciences, Division of Cardiology<br>Cequier, Angel<br>Chettibi, Mohamed; Centre Hospito-universitaire Frantz Fanon, Blida, Algeria<br>Goodman, Shaun; Canadian Heart Research Centre, Division of Cardiology, St Michael's Hospital, University of Toronto, Toronto<br>van 't Hof, Arnoud; Isala Klinieken, Cardiology<br>Montalescot, Gilles; UPMC Sorbonne Universités, ACTION Study Group, INSERM-UMRS 1166, Institut de Cardiologie, Pitié-Salpêtrière Hospital (AP-HP) – Paris, France<br>Swahn, Eva |
| <b>Primary Subject Heading</b>: | Cardiovascular medicine                                                                                                                                                                                                                                                                                                                                                                                                                                                                                                                                                                                                                                                                                                                                                                                                                                                                                               |
| Secondary Subject Heading:      | Medical management                                                                                                                                                                                                                                                                                                                                                                                                                                                                                                                                                                                                                                                                                                                                                                                                                                                                                                    |
| Keywords:                       | Myocardial infarction < CARDIOLOGY, STEMI, gender, ticagrelor, PCI                                                                                                                                                                                                                                                                                                                                                                                                                                                                                                                                                                                                                                                                                                                                                                                                                                                    |
|                                 |                                                                                                                                                                                                                                                                                                                                                                                                                                                                                                                                                                                                                                                                                                                                                                                                                                                                                                                       |

SCHOLARONE™  
Manuscripts

## Association between gender and short term outcome in STEMI patients planned for primary PCI and novel antiplatelet therapy.

A pre-specified gender analysis of the Administration of Ticagrelor in the Cath Lab or in the Ambulance for New ST Elevation Myocardial Infarction to Open the Coronary Artery (ATLANTIC) trial – a multicenter, randomised, placebo-controlled study.

D. Venetsanos<sup>1</sup>, S. Sederholm Lawesson<sup>1</sup>, J. Alfredsson<sup>1</sup>, M. Janzon<sup>1</sup>, A. Cequier<sup>2</sup>, M. Chettibi<sup>3</sup>, S.G. Goodman<sup>4</sup>, A.W. van't Hof<sup>5</sup>, G. Montalescot<sup>6</sup>, E. Swahn<sup>1\*</sup>

<sup>1</sup>Department of Cardiology and Department of Medical and Health Sciences, Linköping University, Linköping, Sweden; <sup>2</sup>Heart Disease Institute, Hospital Universitario de Bellvitge, University of Barcelona, L'Hospitalet de Llobregat, Barcelona, Spain; <sup>3</sup>Centre Hospitalo-universitaire Frantz Fanon, Blida, Algeria; <sup>4</sup>Canadian Heart Research Centre, Division of Cardiology, St Michael's Hospital, University of Toronto, Toronto, Canada; <sup>5</sup>Department of Cardiology, Isala Clinics, Zwolle, Netherlands; <sup>6</sup>UPMC Sorbonne Universités, ACTION Study Group, INSERM-UMRS 1166, Institut de Cardiologie, Pitié-Salpêtrière Hospital (AP-HP) – Paris, France

**Keywords:** myocardial infarction, STEMI, gender, primary PCI, ATLANTIC, ticagrelor

**\*Corresponding author:** Dimitrios Venetsanos, Department of Cardiology and Department of Medical and Health Sciences, Linköping University, SE 58183 Linköping, Sweden.

E-mail: dimitrios.venetsanos@liu.se

## Abstract

### Objectives

To evaluate gender differences in outcomes in STEMI patients treated with PPCI

### Settings

A pre-specified gender analysis of the multicenter, randomised, double-blind ATLANTIC trial

### Participants

Between September 2011 and October 2013, 1862 patients with STEMI and symptom duration less than 6 hours were included

### Interventions

Patients were assigned to pre-hospital versus in-hospital administration of 180 mg ticagrelor.

### Outcomes

The main objective was to study the association between gender and primary and secondary outcomes of the main study with a focus on the clinical efficacy and safety outcomes.

Primary: The proportion of patients who did not have  $\geq 70\%$  resolution of ST segment elevation and did not meet the criteria for TIMI flow 3 at initial angiography.

Secondary: the composite of death, MI, stent thrombosis, stroke, or urgent revascularisation and major or minor bleeding at 30 days.

### Results

Women were older, had higher TIMI risk score, longer pre-hospital delays and better TIMI flow in the infarct related artery. Women had a 3-fold higher risk for all-cause mortality compared to men (5.7% vs 1.9%, HR 3.13, 95% CI 1.78 – 5.51). However, after adjustment for baseline characteristics, the difference was lesser and no longer significant (HR 1.98, 95% CI 0.97 – 4.04). Female gender was not an independent predictor of risk for bleeding after multivariable adjustments (PLATO major HR 1.52, 95% CI 0.76-3.03, TIMI major HR 1.41, 95% CI 0.52-3.88, BARC type 3-5 HR 1.52, 95% CI 0.74-3.09). There was no interaction between gender and efficacy or safety of randomised treatment.

### Conclusion

In STEMI patients treated with current PCI-techniques and modern antiplatelet therapy, gender differences in short term mortality and in hospital bleeds could mainly be explained by older age and clustering of comorbidities in women. Pre-hospital administration of ticagrelor had a similar efficacy and safety profile in men and women with STEMI.



1  
2  
3 **CLINICAL TRIAL REGISTRATION:** clinicaltrials.gov identifier: NCT01347580.  
4  
5

## 6 **Strengths and limitations**

- 7 • This is a pre-specified analysis of a randomised control trial
- 8 • All patients were planned for primary PCI
- 9 • Current PCI techniques and novel antiplatelet therapy were used
- 10 • Appropriate statistical methods were used to adjust for baseline differences between
- 11 genders
- 12 • The large imbalance in the proportion of men and women included caused a reduced
- 13 study power for definitely excluding significant differences in outcomes
- 14
- 15
- 16
- 17
- 18
- 19
- 20
- 21
- 22
- 23

## 24 **Introduction**

25 Recent studies have provided evidence of gender differences in the pathophysiology and the  
26 clinical expression of atherosclerosis.(1) Several registries in patients with ST-segment  
27 elevation myocardial infarction (STEMI) have consistently shown a considerably higher risk  
28 of adverse outcomes in women compared to men. Nevertheless, there are conflicting results  
29 regarding whether gender is an independent contributor to this observation or the higher risk  
30 in women depends on differences in baseline characteristics and comorbidities between  
31 genders.(2-8) Although registries of STEMI patients usually include large, unselected  
32 populations, they share some inherent limitations. Their results are certainly influenced by  
33 differences between genders in the use of timely reperfusion therapy and evidence based drug  
34 therapies as well as undetected confounding factors.(9, 10) Therefore, reports of gender-  
35 based analyses of randomised controlled trials are of crucial importance in an effort to  
36 minimise inequality in the management and evaluate gender as a potential independent risk  
37 factor for adverse outcome. Only a few randomised trials of STEMI patients treated with  
38 primary PCI (PPCI) have reported results in the context of gender.(11, 12) New treatments  
39 (e.g. ticagrelor or prasugrel), special efforts to reduce bleeding (i.e. increased use of radial  
40 arterial access, provisional rather than routine use of glycoprotein (GP) IIb/IIIa inhibitor),  
41 shorter delay times to reperfusion and a growing awareness regarding gender differences in  
42 the management and importance of adherences to evidence based treatment could contribute  
43 to improved ischemic and bleeding outcomes in female STEMI patients.  
44  
45  
46  
47  
48  
49  
50  
51  
52  
53  
54  
55  
56  
57  
58  
59  
60

1  
2  
3 In the ATLANTIC trial, prehospital administration of ticagrelor appeared to be safe but did  
4 not significantly improve outcome compared to in hospital administration in patients with  
5 STEMI, treated with PPCI according to the current modern standards.(13)  
6  
7

8 We present a pre-specified gender analysis of the ATLANTIC trial, with the aim of studying  
9 the association between gender and outcome.  
10

## 11 12 13 **Methods**

14  
15 The ATLANTIC study was an international, randomised, double-blind, placebo-controlled  
16 study with 30 days follow-up. The design of the study, inclusion and exclusion criteria,  
17 outcome definitions and principal results has previously been described.(13, 14) Briefly, 1862  
18 patients presenting with STEMI, less than 6 hours after symptom onset, were included and  
19 randomised to pre-hospital (in the ambulance) versus in-hospital (in the catheterisation  
20 laboratory) treatment with a loading dose of ticagrelor (180mg) in addition to aspirin and  
21 standard clinical care. All patients were to subsequently receive ticagrelor 90 mg twice daily  
22 for 30 days, after which it was recommended that ticagrelor should be continued for up to 12  
23 months. Pre-hospital administration of a GP IIb/IIIa inhibitor was left to the physician's  
24 discretion. Peri-procedural use of parenteral anticoagulants was also left to the physician's  
25 discretion, according to the local practice.  
26  
27  
28  
29  
30  
31  
32  
33

34 The proportion of patients who did not have  $\geq 70\%$  resolution of ST segment elevation before  
35 PCI and / or did not meet the criteria for TIMI flow 3 in the infarct related artery (IRA) at  
36 initial angiography was the primary outcome of the ATLANTIC trial. Secondary outcomes  
37 (clinical efficacy outcomes) included the composite of death, MI, stent thrombosis, stroke, or  
38 urgent revascularisation at 30 days and definite stent thrombosis at 30 days. Safety outcomes  
39 included major and minor bleeding over the 30-day treatment period. Bleeding risk was  
40 evaluated using the TIMI (The Thrombolysis In Myocardial Infarction), BARC (Bleeding  
41 Academic Research Consortium) and PLATO (Study of Platelet Inhibition and Patient  
42 Outcomes) bleeding definitions.(14)  
43  
44  
45  
46  
47  
48

49 The main objective of our analysis was to study the association between gender and primary  
50 and secondary outcomes of the main study with a special focus on the clinical efficacy and  
51 safety outcomes. The interaction of gender subgroups with randomised treatment effects was  
52 also investigated.  
53  
54  
55  
56  
57  
58  
59  
60

1  
2  
3 The trial design and protocol were approved by the national regulatory authorities in all the  
4 participating countries and by the local ethics committee or institutional review board at each  
5 participating site. All patients provided written informed consent.  
6  
7  
8  
9

## 10 11 **Statistical analysis**

12 Continuous variables are presented by their mean and standard deviation (SD) or median and  
13 25<sup>th</sup> -75th percentiles as appropriate. Categorical variables are presented as counts and  
14 percentages. Baseline and peri-procedural characteristics were compared according to gender  
15 by chi-square tests for categorical variables and Student's t-test or Mann Whitney U test for  
16 continuous variables, depending on if the variable of interest was normally distributed or not.  
17 A p-value <0.05 is considered to indicate statistical significance.  
18  
19

20 The incidence of events over time by gender is presented by Kaplan-Meier curves.  
21

22 In order to study the association between gender and the clinical efficacy and safety  
23 outcomes, independent of randomised treatment as well as the possible interactions between  
24 gender and randomised treatment with respect to the outcomes, hazard ratios [HR] with 95%  
25 confidence intervals [CI] were derived from Cox proportional-hazards models. In the  
26 unadjusted (crude) model, gender was the only explanatory variable whereas in the adjusted  
27 multivariable model, gender was forcibly included and the other variables were chosen by  
28 using a forward stepwise selection algorithm with a significant cut-off level of 0.05 for  
29 inclusion. Adjustment variables included age, weight, prior MI, prior PCI, history of diabetes,  
30 hypertension, non-hemorrhagic stroke, gastrointestinal bleeding, time from symptom onset to  
31 pre-PCI electrocardiogram [ECG], admission Killip class (as a dichotomous variable 1 / >1),  
32 baseline hemoglobin, estimated glomerular filtration rate (eGFR) according to the MDRD  
33 formula, use of GP IIIb/IIa inhibitor and location of MI. To evaluate the importance of early  
34 mortality, a landmark analysis of the clinical efficacy outcomes was also performed from 48  
35 hours after randomisation (arbitrarily defined) to the end of the study. In order to explore the  
36 importance of bleeding on the clinical efficacy outcomes, a separate analysis was also  
37 performed by censoring the patients who reported a PLATO major bleeding at the time of the  
38 onset of a bleeding event.  
39  
40  
41  
42  
43  
44  
45  
46  
47  
48  
49  
50  
51  
52

53 A comparable statistical process was used to compare gender differences in the effect of  
54 randomised treatment by constructing logistic regression models. Odds ratios [OR] with 95%  
55 CI are presented. The above process for Cox regression and logistic regression was also used  
56 to explore the interaction effect of gender and treatment.  
57  
58  
59  
60

1  
2  
3 For most of the variables included in the multivariable models, only few patients had missing  
4 data (<10 patients). However, 7% of patients had missing values for creatinine, 5% for  
5 hemoglobin and 4% for Killip class. The number of patients with complete data for  
6 multivariable Cox proportional-hazard models of the primary outcome was 1613 (88%). To  
7 investigate the influence of missing values, multivariable analysis was performed before and  
8 after simple missing values imputation as well as with only gender and age as explanatory  
9 variables (because these variables had no missing values).  
10  
11  
12  
13

14  
15 All the analyses were performed using SAS<sup>®</sup> version 9.3.  
16  
17

## 18 19 Results

### 20 21 Baseline and peri-procedural characteristics stratified by gender

#### 22 23 *Demographic and clinical characteristics*

24  
25 The study population consisted of 369 (20 %) women. They were older (mean age 69 vs. 59  
26 years,  $p<0.01$ ), had lower body mass index (BMI), higher TIMI risk score, more often had a  
27 history of hypertension, chronic obstructive pulmonary disease (COPD) and stroke. Men had  
28 more frequent prior PCI. No difference was observed between genders with respect to acute  
29 heart failure (Killip class > 1) and only a minority of patients presented with cardiogenic  
30 shock (**Table 1**).  
31  
32  
33  
34

#### 35 36 *Time delays*

37  
38 Women had significantly longer delay times, both from symptom onset to prehospital ECG  
39 (median 88 vs 70 minutes,  $p<0.01$ ) and from pre-PCI to post-PCI angiography (median 36 vs  
40 32 minutes,  $p=0.03$ ).  
41  
42  
43

#### 44 45 *Procedural characteristics, angiographic findings, and medication during the index event*

46  
47 Coronary angiography was more often performed by femoral access in women (39.7% vs  
48 30.4%,  $p<0.01$ ). The genders did not differ according to IRA, with the left anterior  
49 descending artery involved in 38% of women and 39% of men. PPCI, with or without stent,  
50 was performed significantly more often in men (88.5% vs 83.7%,  $p<0.01$ ) whereas the use of  
51 drug eluting stents (DES) was similar. Thromboaspiration, GP IIb/IIIa inhibitors and  
52 intravenous anticoagulants were used less often in women. (**Table 1**)  
53  
54  
55  
56  
57  
58  
59  
60

**Table 1.** Baseline, clinical and peri-procedural characteristics according to gender.

| Characteristics                                                        | Women (n=369 )   | Men (n=1493)     | P- value |
|------------------------------------------------------------------------|------------------|------------------|----------|
| Age, years; mean (SD)                                                  | 69 (13.0)        | 59 (11)          | <0.01    |
| Age ≥75 years                                                          | 153 (41.5)       | 151 (10.1)       | <0.01    |
| BMI, kg/m <sup>2</sup> ; median (IQR)                                  | 25.6 (22.5-29.1) | 26.5 (24.3-29.4) | <0.01    |
| Prior history                                                          |                  |                  |          |
| Diabetes mellitus                                                      | 48 (13.0)        | 205 (13.7)       | 0.72     |
| Hypertension                                                           | 190 (51.5)       | 605 (40.5)       | <0.01    |
| Dyslipidemia                                                           | 117 (31.7)       | 536 (35.9)       | 0.13     |
| Angina                                                                 | 36 (9.8)         | 157 (10.5)       | 0.67     |
| Prior myocardial infarction                                            | 24 (6.5)         | 135 (9.0)        | 0.67     |
| Prior PCI                                                              | 16 (4.3)         | 124 (8.3)        | <0.01    |
| Prior CABG                                                             | 1 (0.3)          | 11 (0.7)         | 0.32     |
| Prior non-haemorrhagic stroke                                          | 8 (2.2)          | 10 (0.7)         | <0.01    |
| Chronic obstructive pulmonary disease                                  | 22 (6.0)         | 54 (3.6)         | 0.04     |
| Gastrointestinal bleeding                                              | 1 (0.3)          | 16 (1.1)         | 0.15     |
| Chronic renal disease                                                  | 7 (1.9)          | 27 (1.8)         | 0.91     |
| Index event information                                                |                  |                  |          |
| First medical contact in ambulance                                     | 280 (75.9)       | 1132 (75.8)      | 0.24     |
| Minutes from symptom onset to pre-hospital ECG, median (IQR)           | 88 (49-169)      | 70 (41-129)      | <0.01    |
| Minutes from prehospital ECG to PCI, median (IQR)                      | 83 (68-101)      | 80 (66-96)       | 0.03     |
| Minutes from pre-PCI angiography to post-PCI angiography, median (IQR) | 36 (24-52)       | 32 (23-45)       | 0.03     |
| Received first loading dose                                            | 369 (100)        | 1488 (99.7)      | 0.27     |
| Risk level at admission                                                |                  |                  |          |
| Killip class                                                           |                  |                  |          |
| I                                                                      | 332 (90.0)       | 1349 (90.4)      | 0.82     |
| IV                                                                     | 2 (0.5)          | 3 (0.2)          |          |
| TIMI risk score                                                        |                  |                  |          |
| 0-2                                                                    | 119 (32.2)       | 1006 (67.4)      | <0.01    |
| 3-6                                                                    | 231 (62.6)       | 471 (31.5)       |          |
| >6                                                                     | 19 (5.1)         | 16 (1.1)         |          |
| Culprit vessel                                                         |                  |                  |          |
| Left main artery                                                       | 4 (1.1)          | 18 (1.2)         | 0.63     |

|                                                        |            |             |       |
|--------------------------------------------------------|------------|-------------|-------|
| Left anterior descending artery                        | 141 (38.8) | 571 (39.0)  |       |
| Right coronary artery                                  | 150 (41.3) | 590 (40.3)  |       |
| Left circumflex                                        | 39 (10.7)  | 196 (13.4)  |       |
| No culprit vessel identified                           | 28 (7.7)   | 85 (5.8)    |       |
| Normal coronary angiography                            | 27 (7.4)   | 76 (5.2)    | 0.1   |
| Procedures for index event                             |            |             |       |
| Femoral access                                         | 144 (39.7) | 445 (30.4)  | <0.01 |
| Thromboaspiration                                      | 160 (43.4) | 781 (52.3)  | <0.01 |
| PCI                                                    | 309 (83.7) | 1321 (88.5) | 0.01  |
| With any stent                                         | 288 (78.0) | 1248 (83.6) | 0.01  |
| With DES                                               | 185 (50.1) | 761 (51.0)  | 0.77  |
| Coronary artery bypass grafting                        | 4 (1.1)    | 21 (1.4)    | 0.63  |
| No revascularisation                                   | 56 (15.2)  | 151 (10.1)  | <0.01 |
| Any glycoprotein IIb/IIIa inhibitor use                | 115 (31.2) | 598 (40.1)  | <0.01 |
| Glycoprotein IIb/IIIa inhibitor use before angiography | 14 (3.8)   | 116 (7.8)   | <0.01 |
| Intravenous anticoagulant prior to pre-PCI angiography | 231 (62.6) | 1027 (68.8) | 0.02  |
| Intravenous anticoagulant during hospitalisation †     | 310 (84.0) | 1332 (89.2) | <0.01 |
| Heparin only                                           | 135 (36.6) | 584 (39.1)  | 0.02  |
| Bivalirudin only                                       | 29 (7.9)   | 65 (4.4)    | 0.02  |

Variables presented as numbers (percentages) unless otherwise indicated.

BMI, body mass index; CABG, coronary artery bypass grafting; DES, drug-eluting stent; IQR, interquartile range (25<sup>th</sup>–75<sup>th</sup> percentile); PCI, percutaneous coronary intervention; SD, standard deviation; TIMI, Thrombolysis In Myocardial Infarction.

† Includes all IV medications given on the date of the qualifying ECG and /or index PCI

### Association between gender and outcomes independent of randomised treatment

Female gender was associated with significantly higher risk for the composite outcome of death, MI, stroke, urgent revascularisation or definite acute stent thrombosis compared to male gender (6.8% vs 3.9%, crude HR 1.79, 95% CI 1.12 – 2.86) (**Figure 1**). This difference was mainly driven by a 3-fold higher risk for all-cause mortality in women compared to men (5.7% vs 1.9%, HR 3.13, 95% CI 1.78 – 5.51). However, in the multivariable model, the gender effect was lower and not significantly associated with the composite primary outcome

1  
2  
3 (HR 1.34, 95% CI 0.77 – 2.32) or with all-cause mortality (HR 1.98, 95% CI 0.97 – 4.04)  
4 (**Figure 2 and table 2**). The age-adjusted model showed age to be the most important  
5 predictor of mortality (age-adjusted all-cause mortality, women vs men HR 1.53, 95% CI  
6 0.82 – 2.84). Landmark analysis for events occurring within 48 hours, and between 48 hours  
7 and 30 days showed that 38% of the women and 36% of the men who did not survive the first  
8 month died within 48 hours. Comparison after excluding patients from further analysis at the  
9 time point of a PLATO major bleeding event still revealed a statistically significant  
10 association between women and all-cause mortality (4.3% vs 1.4%. HR 3.20, 95% CI 1.67 –  
11 6.13). However, as for the whole population, this difference was no longer significant in the  
12 multivariable model (HR 1.89, 95% CI 0.81-4.44).

13  
14  
15  
16  
17  
18  
19  
20  
21  
22  
23  
24  
25  
26  
27  
28  
29  
30  
31  
32  
33  
34  
35  
36  
37  
38  
39  
40  
41  
42  
43  
44  
45  
46  
47  
48  
49  
50  
51  
52  
53  
54  
55  
56  
57  
58  
59  
60  
Female gender was associated with lower risk for TIMI flow < 3 in the IRA at initial  
angiography (OR 0.64, 95% CI 0.46-0.91). The risk of incomplete ST-segment elevation  
resolution (<70%) before PCI did not differ significantly between the genders (adjusted OR  
1.15, 95% CI 0.75-1.76). The risk of abnormal TIMI flow in the IRA and incomplete ST  
segment elevation resolution after PCI was similar in both genders (**Figure 3**).

Women had significantly higher risk for major bleeding complications compared to men,  
irrespective of the bleeding definition used (30-day PLATO major bleeding 4.6% vs 2.2%,  
HR 2.15, 95% CI 1.18 – 3.85, TIMI major bleeding at 30 days 2.7% vs 0.9%, HR 2.95, 95%  
CI 1.31 – 6.65, BARC type 3-5 bleeding 4.3% vs 2.1%, HR 2.15, 95% CI 1.18 – 3.93)  
(**Figure 4**). However, after adjustment for baseline and clinical characteristics, female gender  
was no longer an independent predictor of risk for bleeding at 30 days. (**Table 2 and figure  
2**)

To assess whether missing values may have influenced our results, multivariable analyses for  
the primary, secondary and safety outcomes were performed adjusting for age and gender as  
the only explanatory variables; these models provided similar results (data not shown).

Furthermore, multivariable analyses for the primary and secondary outcomes were performed  
before and after simple missing value imputation and showed similar results (data not  
shown).

**Table 2** Association between gender and clinical outcomes independent of randomised treatment



| Outcomes                                                                              | Female (n=369)                | Male (n=1489)                 | Crude hazard ratio (95%CI)<br>(n included=1858) | Adjusted hazard ratio (95%CI)*<br>(n included=1613) | P-value * |
|---------------------------------------------------------------------------------------|-------------------------------|-------------------------------|-------------------------------------------------|-----------------------------------------------------|-----------|
|                                                                                       | Patients with endpoint, n (%) | Patients with endpoint, n (%) |                                                 |                                                     |           |
| Mortality and cardiovascular outcomes                                                 |                               |                               |                                                 |                                                     |           |
| Composite of death/MI/stroke/urgent revascularisation/definite acute stent thrombosis | 25 (6.8)                      | 58 (3.9)                      | 1.79 (1.12-2.86)                                | 1.34 (0.77-2.32)                                    | 0.30      |
| Composite of death/MI/urgent revascularisation                                        | 23 (6.2)                      | 50 (3.4)                      | 1.91 (1.17-3.13)                                | 1.32 (0.74-2.36)                                    | 0.35      |
| All-cause mortality                                                                   | 21 (5.7)                      | 28 (1.9)                      | 3.13 (1.78-5.51)                                | 1.98 (0.97-4.04)                                    | 0.06      |
| Myocardial infarction                                                                 | 3 (0.8)                       | 14 (0.9)                      | 0.90 (0.26-3.13)                                | 0.82 (0.23-2.85)                                    | 0.75      |
| Stroke                                                                                | 3 (0.8)                       | 3 (0.2)                       | 4.18 (0.84-20.70)                               | 4.14 (0.84-20.53)                                   | 0.08      |
| Urgent revascularisation                                                              | 2 (0.5)                       | 11 (0.7)                      | 0.75 (0.17-3.38)                                | 0.69 (0.15-3.11)                                    | 0.63      |
| Definite acute stent thrombosis                                                       | 3 (0.8)                       | 10 (0.7)                      | 1.23 (0.34-4.49)                                | 1.29 (0.35-4.76)                                    | 0.70      |
| Acute stent thrombosis (definite or probable)                                         | 11 (3.0)                      | 30 (2.0)                      | 1.53 (0.77-3.05)                                | 0.88 (0.39-1.98)                                    | 0.76      |
| Safety outcomes                                                                       |                               |                               |                                                 |                                                     |           |
| PLATO major bleeding **                                                               | 17 (4.6)                      | 33 (2.2)                      | 2.15 (1.20-3.85)                                | 1.52 (0.76-3.03)                                    | 0.24      |
| TIMI major bleeding **                                                                | 10 (2.7)                      | 14 (0.9)                      | 2.95 (1.31-6.65)                                | 1.41 (0.52-3.88)                                    | 0.50      |
| TIMI major or minor bleeding**                                                        | 18 (4.9)                      | 54 (3.6)                      | 1.38 (0.81-2.35)                                | 1.0 (0.54-1.86)                                     | 0.99      |



1  
2  
3  
4  
5  
6  
7  
8  
9  
10  
11  
12  
13  
14  
15  
16  
17  
18  
19  
20  
21  
22  
23  
24  
25  
26  
27  
28  
29  
30  
31  
32  
33  
34  
35  
36  
37  
38  
39  
40  
41  
42  
43  
44  
45  
46  
47  
48  
49

---

|                                           |          |          |                  |                  |      |
|-------------------------------------------|----------|----------|------------------|------------------|------|
| BARC type 3-5 (major) bleeding**          | 16 (4.3) | 31 (2.1) | 2.15 (1.18-3.93) | 1.52 (0.74-3.09) | 0.25 |
| BARC type 2-5 (major or minor) bleeding** | 20 (5.4) | 56 (3.8) | 1.48 (0.89-2.47) | 1.09 (0.60-1.97) | 0.78 |

---

\*Hazard ratio (for female versus male) and p-value calculated from logistic regression model including gender, age, weight, prior myocardial infarction, prior percutaneous coronary intervention, diabetes, hypertension, non-hemorrhagic stroke, gastrointestinal bleeding, time from symptom onset to pre-hospital ECG, admission Killip class, baseline hemoglobin, estimated glomerular filtration rate, glycoprotein IIb/IIIa inhibitor use during index procedure, location of myocardial infarction

\*\*Non-CABG related bleeding occurring up to the date of the last study visit (to the maximum of 32 days) are included in the table

BARC, Bleeding Academic Research Consortium; MI, myocardial infarction; PLATO, Study of Platelet Inhibition and Patient Outcomes; TIMI, Thrombolysis in Myocardial Infarction

### Association between gender and efficacy and safety of randomised treatment

Pre-hospital administration of ticagrelor compared to in-hospital administration resulted in a non-significant difference in the primary, secondary and safety outcomes. No significant interactions between randomised treatment and gender in terms of these outcomes were found in the unadjusted or adjusted model (test for interaction in the multivariable models;  $p=0.86$  for the primary outcome,  $p=0.93$  for all-cause mortality,  $p=0.19$  for absence of TIMI flow grade 3 in the IRA at initial angiography,  $p=0.71$  for absence of  $\geq 70\%$  resolution of pre-PCI ST segment elevation, and  $p=0.28$  for TIMI major bleeding at 30 days). (Supplementary tables 1, 2 and 3).

### Discussion

In the present analysis, unadjusted data showed a significantly higher risk of the composite outcome of death, MI, stroke, urgent revascularisation or definite acute stent thrombosis in women, mainly driven by a three times higher risk for short-term mortality. After multivariable adjustment female gender was not an independent predictor of worse outcome.

Undoubtedly, older age and clustering of comorbidities in women could explain a large part of the observed difference in short term clinical outcomes in our study. However, the adjusted risk for death, while not statistically significant, was still considerably higher in women, generating the hypothesis that gender could be an independent predictor of early mortality if the population of the study was larger. Any possible contribution of gender, as independent risk factor, on adverse outcome may depend on the population studied. The age gap between genders in our population was substantially higher compared to previous studies, with a mean age difference of 10 years.(12, 15) In spite of appropriate statistical methods that were used for adjustment, adjustment for such age-difference is awkward. Additionally, the age difference may indicate a selection bias. As identification and randomisation took place in the ambulance, young women with suspected STEMI were possibly not included in the study as alternative reasons for ST-segment elevation on prehospital ECG may have been considered more plausible in this group. These factors may explain the observed trend toward increased adjusted risk for early mortality in women.

A plethora of observational studies in STEMI cohorts and a meta-analysis have shown a higher risk of early mortality in women.(6, 7, 16, 17) Significant differences in the rate of

1  
2  
3 reperfusion therapy between genders and hidden confounders such as frailty in elderly  
4 women with STEMI may partially explain their results. In accordance with our results,  
5 previous gender analyses of RCTs have shown that the impact of gender on mortality could  
6 mainly be explained by differences in age and comorbidities between genders.(11, 12, 15, 18,  
7 19) In the CADILLAC study,(11) women had a 4-fold higher unadjusted risk for 30 days  
8 mortality but after adjustment no significant difference remained. In STEMI treated with  
9 thrombolysis Motovska et al showed that gender was not an independent predictor of  
10 outcome,(12) The recent PLATO trial showed concurred results but NSTEMI and STEMI  
11 patients were pooled in the gender analysis, despite the fact that the relationship between  
12 gender and outcome depends on the type of ACS.(20) Most of these studies do not reflect  
13 current treatment of STEMI patients. Despite evolving PCI techniques and novel  
14 pharmacological treatment, women still have worse short term outcome and special effort,  
15 with respect to their advanced age and comorbidities, to improve their outcomes are  
16 warranted.  
17

18  
19  
20  
21  
22  
23  
24  
25  
26  
27 Some well-known gender disparities in the concomitant management of STEMI patients  
28 remained unchanged. Women were less likely to be treated with GP IIb/IIIa inhibitors and  
29 thrombo-aspiration during PPCI despite lack of gender difference in protection from major  
30 adverse outcomes by GP IIb/IIIa inhibitors (21) and benefit of thrombo-aspiration at the time  
31 when the study was conducted.(22) Similar findings have been provided by large  
32 registries.(7, 8) Some of these lower rates of utilization may be “appropriate” given the  
33 higher TIMI 3 flow rates in the IRA pre-PPCI and lower rates of PPCI in women vs. men.  
34 Furthermore, physician’s concern for higher risk of bleeding in older women with STEMI has  
35 certainly contributed to the lower use of GP IIb/IIIa inhibitors in women.  
36

37  
38  
39  
40  
41  
42 Although the impact of early reperfusion on mortality in STEMI patients is now  
43 unquestionable,(23) patients’ delay from symptom onset to prehospital ECG was not an  
44 independent predictor of mortality in our study, in agreement with results from previous  
45 gender analyses.(24, 25) A plausible explanation is an association between age and delay,  
46 and thus adjustment for age minimizes the relative impact of delay. Furthermore, in PPCI,  
47 female gender has been associated with similar or even smaller infarct size than that in male  
48 gender, due to longer prehospital delays, indicating that other factors than larger infarct size  
49 secondary to longer prehospital delay mainly contribute to the observed higher unadjusted  
50 short term mortality.(24) The proportion of 30 day mortality that occurred within 48 hours of  
51 admission was similar in women and men (38% vs 36% respectively) contrasting previous  
52  
53  
54  
55  
56  
57  
58  
59  
60

1  
2  
3 data where gender differences in early mortality were accounted for by excess very early  
4 (within 24-48 hours) deaths in women with STEMI.(7, 26) Cardiogenic shock and  
5 hemodynamic instability were key exclusion criteria in the ATLANTIC trial which may have  
6 influenced these results. Cardiogenic shock has been shown to be more common in women  
7 and female gender has been highly associated with mortality in shock patients.(27)

8  
9  
10  
11 In the present study, women had a 2-3 times higher unadjusted risk for non-CABG related  
12 bleedings, depending on the definition used. After adjustment for baseline characteristics, no  
13 significant difference remained. Female gender has previously been associated with higher  
14 risk for bleeding complications in patients with ACS.(28-31) Known predictors of bleedings  
15 like advanced age, diabetes, hypertension, renal insufficiency and anemia, are usually more  
16 often encountered in women with STEMI.(32) Additionally, smaller body and vessel size,  
17 higher use of femoral access and overdosing of antithrombotic medication in women may  
18 explain the higher observed risk for bleeding. Procedural-related improvement such as  
19 increased use of radial access or smaller femoral sheaths and careful dose adjustment of  
20 antithrombotic medication, have resulted in a significant decline in the risk of  
21 bleeding/vascular complication during cardiovascular interventions the last years and have  
22 probably contributed to our results. (33)

23  
24  
25  
26  
27  
28  
29  
30  
31  
32  
33 The negative impact of bleedings on prognosis in patients with STEMI is well established.  
34 (32) Our data showed that even after excluding patients from further analysis at the time of a  
35 PLATO major bleeding, the unadjusted HR for early mortality in women vs men remained  
36 unchanged, implying that reducing the rate of major bleeding in women may improve their  
37 prognosis but is not the main reason for the observed difference between genders in the early  
38 mortality.

39  
40  
41  
42  
43  
44  
45  
46  
47  
48  
49  
50  
51  
52 In terms of ST-segment elevation resolution and TIMI flow 3 rates before and after PCI, no  
53 significant difference between genders was observed apart from a lower risk of abnormal  
54 coronary flow in IRA at initial angiography in women. The higher rate of TIMI flow 3 at  
55 initial angiography may be explained by the higher rate of normal coronary arteries as well as  
56 the less obstructive coronary artery disease in women with STEMI, which is in concordance  
57 with previous data.(25)

58  
59  
60  
61  
62  
63  
64  
65  
66  
67  
68  
69  
70  
71  
72  
73  
74  
75  
76  
77  
78  
79  
80  
81  
82  
83  
84  
85  
86  
87  
88  
89  
90  
91  
92  
93  
94  
95  
96  
97  
98  
99  
100  
101  
102  
103  
104  
105  
106  
107  
108  
109  
110  
111  
112  
113  
114  
115  
116  
117  
118  
119  
120  
121  
122  
123  
124  
125  
126  
127  
128  
129  
130  
131  
132  
133  
134  
135  
136  
137  
138  
139  
140  
141  
142  
143  
144  
145  
146  
147  
148  
149  
150  
151  
152  
153  
154  
155  
156  
157  
158  
159  
160  
161  
162  
163  
164  
165  
166  
167  
168  
169  
170  
171  
172  
173  
174  
175  
176  
177  
178  
179  
180  
181  
182  
183  
184  
185  
186  
187  
188  
189  
190  
191  
192  
193  
194  
195  
196  
197  
198  
199  
200  
201  
202  
203  
204  
205  
206  
207  
208  
209  
210  
211  
212  
213  
214  
215  
216  
217  
218  
219  
220  
221  
222  
223  
224  
225  
226  
227  
228  
229  
230  
231  
232  
233  
234  
235  
236  
237  
238  
239  
240  
241  
242  
243  
244  
245  
246  
247  
248  
249  
250  
251  
252  
253  
254  
255  
256  
257  
258  
259  
260  
261  
262  
263  
264  
265  
266  
267  
268  
269  
270  
271  
272  
273  
274  
275  
276  
277  
278  
279  
280  
281  
282  
283  
284  
285  
286  
287  
288  
289  
290  
291  
292  
293  
294  
295  
296  
297  
298  
299  
300  
301  
302  
303  
304  
305  
306  
307  
308  
309  
310  
311  
312  
313  
314  
315  
316  
317  
318  
319  
320  
321  
322  
323  
324  
325  
326  
327  
328  
329  
330  
331  
332  
333  
334  
335  
336  
337  
338  
339  
340  
341  
342  
343  
344  
345  
346  
347  
348  
349  
350  
351  
352  
353  
354  
355  
356  
357  
358  
359  
360  
361  
362  
363  
364  
365  
366  
367  
368  
369  
370  
371  
372  
373  
374  
375  
376  
377  
378  
379  
380  
381  
382  
383  
384  
385  
386  
387  
388  
389  
390  
391  
392  
393  
394  
395  
396  
397  
398  
399  
400  
401  
402  
403  
404  
405  
406  
407  
408  
409  
410  
411  
412  
413  
414  
415  
416  
417  
418  
419  
420  
421  
422  
423  
424  
425  
426  
427  
428  
429  
430  
431  
432  
433  
434  
435  
436  
437  
438  
439  
440  
441  
442  
443  
444  
445  
446  
447  
448  
449  
450  
451  
452  
453  
454  
455  
456  
457  
458  
459  
460  
461  
462  
463  
464  
465  
466  
467  
468  
469  
470  
471  
472  
473  
474  
475  
476  
477  
478  
479  
480  
481  
482  
483  
484  
485  
486  
487  
488  
489  
490  
491  
492  
493  
494  
495  
496  
497  
498  
499  
500  
501  
502  
503  
504  
505  
506  
507  
508  
509  
510  
511  
512  
513  
514  
515  
516  
517  
518  
519  
520  
521  
522  
523  
524  
525  
526  
527  
528  
529  
530  
531  
532  
533  
534  
535  
536  
537  
538  
539  
540  
541  
542  
543  
544  
545  
546  
547  
548  
549  
550  
551  
552  
553  
554  
555  
556  
557  
558  
559  
560  
561  
562  
563  
564  
565  
566  
567  
568  
569  
570  
571  
572  
573  
574  
575  
576  
577  
578  
579  
580  
581  
582  
583  
584  
585  
586  
587  
588  
589  
590  
591  
592  
593  
594  
595  
596  
597  
598  
599  
600  
601  
602  
603  
604  
605  
606  
607  
608  
609  
610  
611  
612  
613  
614  
615  
616  
617  
618  
619  
620  
621  
622  
623  
624  
625  
626  
627  
628  
629  
630  
631  
632  
633  
634  
635  
636  
637  
638  
639  
640  
641  
642  
643  
644  
645  
646  
647  
648  
649  
650  
651  
652  
653  
654  
655  
656  
657  
658  
659  
660  
661  
662  
663  
664  
665  
666  
667  
668  
669  
670  
671  
672  
673  
674  
675  
676  
677  
678  
679  
680  
681  
682  
683  
684  
685  
686  
687  
688  
689  
690  
691  
692  
693  
694  
695  
696  
697  
698  
699  
700  
701  
702  
703  
704  
705  
706  
707  
708  
709  
710  
711  
712  
713  
714  
715  
716  
717  
718  
719  
720  
721  
722  
723  
724  
725  
726  
727  
728  
729  
730  
731  
732  
733  
734  
735  
736  
737  
738  
739  
740  
741  
742  
743  
744  
745  
746  
747  
748  
749  
750  
751  
752  
753  
754  
755  
756  
757  
758  
759  
760  
761  
762  
763  
764  
765  
766  
767  
768  
769  
770  
771  
772  
773  
774  
775  
776  
777  
778  
779  
780  
781  
782  
783  
784  
785  
786  
787  
788  
789  
790  
791  
792  
793  
794  
795  
796  
797  
798  
799  
800  
801  
802  
803  
804  
805  
806  
807  
808  
809  
810  
811  
812  
813  
814  
815  
816  
817  
818  
819  
820  
821  
822  
823  
824  
825  
826  
827  
828  
829  
830  
831  
832  
833  
834  
835  
836  
837  
838  
839  
840  
841  
842  
843  
844  
845  
846  
847  
848  
849  
850  
851  
852  
853  
854  
855  
856  
857  
858  
859  
860  
861  
862  
863  
864  
865  
866  
867  
868  
869  
870  
871  
872  
873  
874  
875  
876  
877  
878  
879  
880  
881  
882  
883  
884  
885  
886  
887  
888  
889  
890  
891  
892  
893  
894  
895  
896  
897  
898  
899  
900  
901  
902  
903  
904  
905  
906  
907  
908  
909  
910  
911  
912  
913  
914  
915  
916  
917  
918  
919  
920  
921  
922  
923  
924  
925  
926  
927  
928  
929  
930  
931  
932  
933  
934  
935  
936  
937  
938  
939  
940  
941  
942  
943  
944  
945  
946  
947  
948  
949  
950  
951  
952  
953  
954  
955  
956  
957  
958  
959  
960  
961  
962  
963  
964  
965  
966  
967  
968  
969  
970  
971  
972  
973  
974  
975  
976  
977  
978  
979  
980  
981  
982  
983  
984  
985  
986  
987  
988  
989  
990  
991  
992  
993  
994  
995  
996  
997  
998  
999  
1000

1  
2  
3 resolution of ST elevation pre-PCI. Clinical efficacy outcomes were not significantly  
4 improved either. However, prehospital administration of ticagrelor was safe in both genders  
5 with similar rate of major and minor bleedings.  
6  
7  
8  
9

## 10 **Strengths and limitations**

11 The present study has some important limitations. The ATLANTIC trial was not stratified by  
12 gender. The large imbalance in the proportion of men and women included, commonly  
13 encountered in a STEMI population, caused a reduced power for detecting significant  
14 differences in outcomes between the genders or to definitely exclude an interaction between  
15 gender and the randomised treatment. As this is a gender analysis performed on data from a  
16 randomised trial the generalisability to a “real-life” situation of STEMI-patients is limited.  
17 The current study was planned as a pre-specified gender analysis in the randomised,  
18 controlled ATLANTIC trial. The most important strength of our analysis is that patients were  
19 treated according to the current guidelines of STEMI, with PPCI as the reperfusion strategy  
20 of choice, administration of the modern ADP receptor-blocker ticagrelor in addition to aspirin  
21 as soon as possible after the first medical contact, high use of radial access during  
22 catheterisation and adjuvant pharmacologic treatment during PPCI with UFH or bivalirudin.  
23 (34) Therefore our study provides important information about differences and similarities  
24 between genders in STEMI patients treated with current PCI techniques and pharmacologic  
25 treatment.  
26  
27  
28  
29  
30  
31  
32  
33  
34  
35  
36  
37  
38

## 39 **Conclusion**

40 In patients with STEMI, treated with PPCI women have significantly higher mortality and  
41 bleeding complications. However, after adjustment for baseline characteristics, the observed  
42 gender differences were attenuated and no longer statistically significant, indicating that at  
43 least part of the observed difference is explained by older age and clustering of comorbidities  
44 in women. Regardless, female gender identifies a group of patients with high risk of early  
45 mortality in whom prompt efforts to improve outcome are warranted. Prehospital  
46 administration of ticagrelor had a similar efficacy and safety profile in men and women with  
47 STEMI.  
48  
49  
50  
51  
52  
53  
54  
55  
56  
57  
58  
59  
60

## Acknowledgements

Statistical analysis was performed by Richard Cairns from Worldwide Clinical Trials UK. The authors would like to thank all patients who took part in this study. Editorial support was provided by Liz Anfield, Prime Medica Ltd, Knutsford, Cheshire, and was funded by AstraZeneca.

## Funding statement

The main ATLANTIC trial was financed by AstraZeneca. Editorial support for this study was funded by AstraZeneca.

## Interest statement

D.V. reports that he has no relationships relevant to the contents of this paper to disclose.

S.S.L. reports that she has no relationships relevant to the contents of this paper to disclose.

J.A. reports receiving lecture fees from AstraZeneca.

M.J. reports receiving lecture fees from AstraZeneca and Sanofi.

A.C. reports that he has no relationships relevant to the contents of this paper to disclose.

M.C. reports that he has no relationships relevant to the contents of this paper to disclose.

S.G.G. reports receiving research grants and speaker/consulting honoraria from AstraZeneca, Daiichi Sankyo, Eli Lilly, Sanofi, Bristol-Myers Squibb, Merck, and The Medicines Company.

A.W. v.H. reports receiving research and educational grants from Abbott, AstraZeneca, Eli Lilly/Daiichi Sankyo, Merck/Correvio, Medtronic, and The Medicines Company and speaker fees from Boehringer Ingelheim, Abbott, AstraZeneca, Eli Lilly/Daiichi Sankyo, Merck/Correvio, Medtronic, The Medicines Company, Pfizer, and Sanofi.

G.M. reports receiving research grants to the Institution or consulting/lecture fees from Acuitude, ADIR, Amgen, AstraZeneca, Bayer, Berlin Chimie AG, Boehringer Ingelheim, Bristol-Myers Squibb, Brigham Women's Hospital, Cardiovascular Research Foundation, Celladon, CME resources, Daiichi-Sankyo, Eli-Lilly, Europa, Fédération Française de Cardiologie, Gilead, Hopitaux Universitaires Genève, ICAN, Janssen-Cilag, Lead-Up, Medcon International, Menarini, Medtronic, MSD, Pfizer, Recor, Sanofi-Aventis, Stentys, The Medicines Company, TIMI Study Group, Universitat Basel, WebMD, and Zoll Medical.

E. Swahn reports receiving lecture fees from AstraZeneca.

## Author's contribution

E. Swahn is responsible for the conception and design of the gender substudy of the ATLANTIC trial. D. Venetsanos is responsible for analyses and interpretation of the data and drafted the manuscript. S. Sederholm Lawesson, J. Alfredsson, M. Janzon, A.Cequier, M. Chettibi, S.G. Goodman, A.W. van't Hof and G. Montalescot have critically revised the manuscript and added important intellectual content.

1  
2  
3  
4  
5  
6  
7  
8  
9  
10  
11  
12  
13  
14  
15  
16  
17  
18  
19  
20  
21  
22  
23  
24  
25  
26  
27  
28  
29  
30  
31  
32  
33  
34  
35  
36  
37  
38  
39  
40  
41  
42  
43  
44  
45  
46  
47  
48  
49  
50  
51  
52  
53  
54  
55  
56  
57  
58  
59  
60

All authors have participated in the work and have read and approved the manuscript.

For peer review only



## References

1. Bairey Merz CN, Shaw LJ, Reis SE, Bittner V, Kelsey SF, Olson M, et al. Insights from the NHLBI-Sponsored Women's Ischemia Syndrome Evaluation (WISE) Study: Part II: gender differences in presentation, diagnosis, and outcome with regard to gender-based pathophysiology of atherosclerosis and macrovascular and microvascular coronary disease. *Journal of the American College of Cardiology*. 2006;47(3 Suppl):S21-9.
2. Mehta RH, Stebbins AS, Lopes RD, Califf RM, Pieper KS, Armstrong PW, et al. Comparison of incidence of bleeding and mortality of men versus women with ST-elevation myocardial infarction treated with fibrinolysis. *The American journal of cardiology*. 2012;109(3):320-6.
3. Kyto V, Sipila J, Rautava P. Gender and in-hospital mortality of ST-segment elevation myocardial infarction (from a multihospital nationwide registry study of 31,689 patients). *The American journal of cardiology*. 2015;115(3):303-6.
4. Jakobsen L, Niemann T, Thorsgaard N, Nielsen TT, Thuesen L, Lassen JF, et al. Sex- and age-related differences in clinical outcome after primary percutaneous coronary intervention. *EuroIntervention : journal of EuroPCR in collaboration with the Working Group on Interventional Cardiology of the European Society of Cardiology*. 2012;8(8):904-11.
5. Kang SH, Suh JW, Yoon CH, Cho MC, Kim YJ, Chae SC, et al. Sex differences in management and mortality of patients with ST-elevation myocardial infarction (from the Korean Acute Myocardial Infarction National Registry). *The American journal of cardiology*. 2012;109(6):787-93.
6. Lawesson SS, Alfredsson J, Fredrikson M, Swahn E. A gender perspective on short- and long term mortality in ST-elevation myocardial infarction--a report from the SWEDEHEART register. *International journal of cardiology*. 2013;168(2):1041-7.
7. de Boer SP, Roos-Hesselink JW, van Leeuwen MA, Lenzen MJ, van Geuns RJ, Regar E, et al. Excess mortality in women compared to men after PCI in STEMI: an analysis of 11,931 patients during 2000-2009. *International journal of cardiology*. 2014;176(2):456-63.
8. Leurent G, Garlantezec R, Auffret V, Hacot JP, Coudert I, Filippi E, et al. Gender differences in presentation, management and inhospital outcome in patients with ST-segment elevation myocardial infarction: data from 5000 patients included in the ORBI prospective French regional registry. *Archives of cardiovascular diseases*. 2014;107(5):291-8.
9. Lawesson SS, Alfredsson J, Fredrikson M, Swahn E. Time trends in STEMI--improved treatment and outcome but still a gender gap: a prospective observational cohort study from the SWEDEHEART register. *BMJ open*. 2012;2(2):e000726.
10. Pilgrim T, Heg D, Tal K, Erne P, Radovanovic D, Windecker S, et al. Age- and Gender-related Disparities in Primary Percutaneous Coronary Interventions for Acute ST-segment elevation Myocardial Infarction. *PloS one*. 2015;10(9):e0137047.
11. Lansky AJ, Pietras C, Costa RA, Tsuchiya Y, Brodie BR, Cox DA, et al. Gender differences in outcomes after primary angioplasty versus primary stenting with and without abciximab for acute myocardial infarction: results of the Controlled Abciximab and Device Investigation to Lower Late Angioplasty Complications (CADILLAC) trial. *Circulation*. 2005;111(13):1611-8.
12. Motovska Z, Widimsky P, Aschermann M, Investigators PSG. The impact of gender on outcomes of patients with ST elevation myocardial infarction transported for percutaneous coronary intervention: analysis of the PRAGUE-1 and 2 studies. *Heart*. 2008;94(3):e5.
13. Montalescot G, van 't Hof AW, Lapostolle F, Silvain J, Lassen JF, Bolognese L, et al. Prehospital ticagrelor in ST-segment elevation myocardial infarction. *The New England journal of medicine*. 2014;371(11):1016-27.
14. Montalescot G, Lassen JF, Hamm CW, Lapostolle F, Silvain J, ten Berg JM, et al. Ambulance or in-catheterization laboratory administration of ticagrelor for primary percutaneous coronary intervention for ST-segment elevation myocardial infarction: rationale and design of the randomized, double-blind Administration of Ticagrelor in the cath Lab or in the Ambulance for New



- 1  
2  
3 ST elevation myocardial infarction to open the Coronary artery (ATLANTIC) study. *American heart*  
4 *journal*. 2013;165(4):515-22.
- 5 15. Wijnbergen I, Tijssen J, van 't Veer M, Michels R, Pijls NH. Gender differences in long-  
6 term outcome after primary percutaneous intervention for ST-segment elevation myocardial  
7 infarction. *Catheterization and cardiovascular interventions : official journal of the Society for*  
8 *Cardiac Angiography & Interventions*. 2013;82(3):379-84.
- 9 16. Pancholy SB, Shantha GP, Patel T, Cheskin LJ. Sex differences in short-term and long-  
10 term all-cause mortality among patients with ST-segment elevation myocardial infarction treated by  
11 primary percutaneous intervention: a meta-analysis. *JAMA internal medicine*. 2014;174(11):1822-30.
- 12 17. Benamer H, Tafflet M, Bataille S, Escolano S, Livarek B, Fourchard V, et al. Female  
13 gender is an independent predictor of in-hospital mortality after STEMI in the era of primary PCI:  
14 insights from the greater Paris area PCI Registry. *EuroIntervention : journal of EuroPCR in*  
15 *collaboration with the Working Group on Interventional Cardiology of the European Society of*  
16 *Cardiology*. 2011;6(9):1073-9.
- 17 18. Husted S, James SK, Bach RG, Becker RC, Budaj A, Heras M, et al. The efficacy of  
18 ticagrelor is maintained in women with acute coronary syndromes participating in the prospective,  
19 randomized, PLATelet inhibition and patient Outcomes (PLATO) trial. *European heart journal*.  
20 2014;35(23):1541-50.
- 21 19. De Luca G, Gibson CM, Gyongyosi M, Zeymer U, Dudek D, Arntz HR, et al. Gender-  
22 related differences in outcome after ST-segment elevation myocardial infarction treated by primary  
23 angioplasty and glycoprotein IIb/IIIa inhibitors: insights from the EGYPT cooperation. *Journal of*  
24 *thrombosis and thrombolysis*. 2010;30(3):342-6.
- 25 20. Champney KP, Frederick PD, Bueno H, Parashar S, Foody J, Merz CN, et al. The joint  
26 contribution of sex, age and type of myocardial infarction on hospital mortality following acute  
27 myocardial infarction. *Heart*. 2009;95(11):895-9.
- 28 21. Cho L, Topol EJ, Balog C, Foody JM, Booth JE, Cabot C, et al. Clinical benefit of  
29 glycoprotein IIb/IIIa blockade with Abciximab is independent of gender: pooled analysis from EPIC,  
30 EPILOG and EPISTENT trials. *Evaluation of 7E3 for the Prevention of Ischemic Complications.*  
31 *Evaluation in Percutaneous Transluminal Coronary Angioplasty to Improve Long-Term Outcome with*  
32 *Abciximab GP IIb/IIIa blockade. Evaluation of Platelet IIb/IIIa Inhibitor for Stent.* *Journal of the*  
33 *American College of Cardiology*. 2000;36(2):381-6.
- 34 22. Vlaar PJ, Svilaas T, van der Horst IC, Diercks GF, Fokkema ML, de Smet BJ, et al.  
35 Cardiac death and reinfarction after 1 year in the Thrombus Aspiration during Percutaneous  
36 coronary intervention in Acute myocardial infarction Study (TAPAS): a 1-year follow-up study.  
37 *Lancet*. 2008;371(9628):1915-20.
- 38 23. De Luca G, Suryapranata H, Ottervanger JP, Antman EM. Time delay to treatment and  
39 mortality in primary angioplasty for acute myocardial infarction: every minute of delay counts.  
40 *Circulation*. 2004;109(10):1223-5.
- 41 24. Sadowski M, Gasior M, Gierlotka M, Janion M, Polonski L. Gender-related differences  
42 in mortality after ST-segment elevation myocardial infarction: a large multicentre national registry.  
43 *EuroIntervention : journal of EuroPCR in collaboration with the Working Group on Interventional*  
44 *Cardiology of the European Society of Cardiology*. 2011;6(9):1068-72.
- 45 25. Otten AM, Maas AH, Ottervanger JP, Kloosterman A, van 't Hof AW, Dambrink JH, et  
46 al. Is the difference in outcome between men and women treated by primary percutaneous  
47 coronary intervention age dependent? Gender difference in STEMI stratified on age. *European heart*  
48 *journal Acute cardiovascular care*. 2013;2(4):334-41.
- 49 26. Jneid H, Fonarow GC, Cannon CP, Hernandez AF, Palacios IF, Marea AO, et al. Sex  
50 differences in medical care and early death after acute myocardial infarction. *Circulation*.  
51 2008;118(25):2803-10.
- 52 27. Suessenbacher A, Doerler J, Alber H, Aichinger J, Altenberger J, Benzer W, et al.  
53 Gender-related outcome following percutaneous coronary intervention for ST-elevation myocardial  
54  
55  
56  
57  
58  
59  
60

- 1  
2  
3 infarction: data from the Austrian acute PCI registry. *EuroIntervention* : journal of EuroPCR in  
4 collaboration with the Working Group on Interventional Cardiology of the European Society of  
5 Cardiology. 2008;4(2):271-6.
- 6 28. Steg PG, Huber K, Andreotti F, Arnesen H, Atar D, Badimon L, et al. Bleeding in acute  
7 coronary syndromes and percutaneous coronary interventions: position paper by the Working  
8 Group on Thrombosis of the European Society of Cardiology. *European heart journal*.  
9 2011;32(15):1854-64.
- 10 29. Mehran R, Pocock SJ, Nikolsky E, Clayton T, Dangas GD, Kirtane AJ, et al. A risk score to  
11 predict bleeding in patients with acute coronary syndromes. *Journal of the American College of*  
12 *Cardiology*. 2010;55(23):2556-66.
- 13 30. Becker RC, Bassand JP, Budaj A, Wojdyla DM, James SK, Cornel JH, et al. Bleeding  
14 complications with the P2Y12 receptor antagonists clopidogrel and ticagrelor in the PLATElet  
15 inhibition and patient Outcomes (PLATO) trial. *European heart journal*. 2011;32(23):2933-44.
- 16 31. Mathews R, Peterson ED, Chen AY, Wang TY, Chin CT, Fonarow GC, et al. In-hospital  
17 major bleeding during ST-elevation and non-ST-elevation myocardial infarction care: derivation and  
18 validation of a model from the ACTION Registry(R)-GWTG. *The American journal of cardiology*.  
19 2011;107(8):1136-43.
- 20 32. Manoukian SV, Feit F, Mehran R, Voeltz MD, Ebrahimi R, Hamon M, et al. Impact of  
21 major bleeding on 30-day mortality and clinical outcomes in patients with acute coronary  
22 syndromes: an analysis from the ACUITY Trial. *Journal of the American College of Cardiology*.  
23 2007;49(12):1362-8.
- 24 33. Ahmed B, Piper WD, Malenka D, VerLee P, Robb J, Ryan T, et al. Significantly improved  
25 vascular complications among women undergoing percutaneous coronary intervention: a report  
26 from the Northern New England Percutaneous Coronary Intervention Registry. *Circulation*  
27 *Cardiovascular interventions*. 2009;2(5):423-9.
- 28 34. Wessler JD, Stant J, Duru S, Rabbani L, Kirtane AJ. Updates to the ACCF/AHA and ESC  
29 STEMI and NSTEMI guidelines: putting guidelines into clinical practice. *The American journal of*  
30 *cardiology*. 2015;115(5 Suppl):23A-8A.
- 31  
32  
33  
34  
35  
36  
37  
38  
39  
40  
41  
42  
43  
44  
45  
46  
47  
48  
49  
50  
51  
52  
53  
54  
55  
56  
57  
58  
59  
60

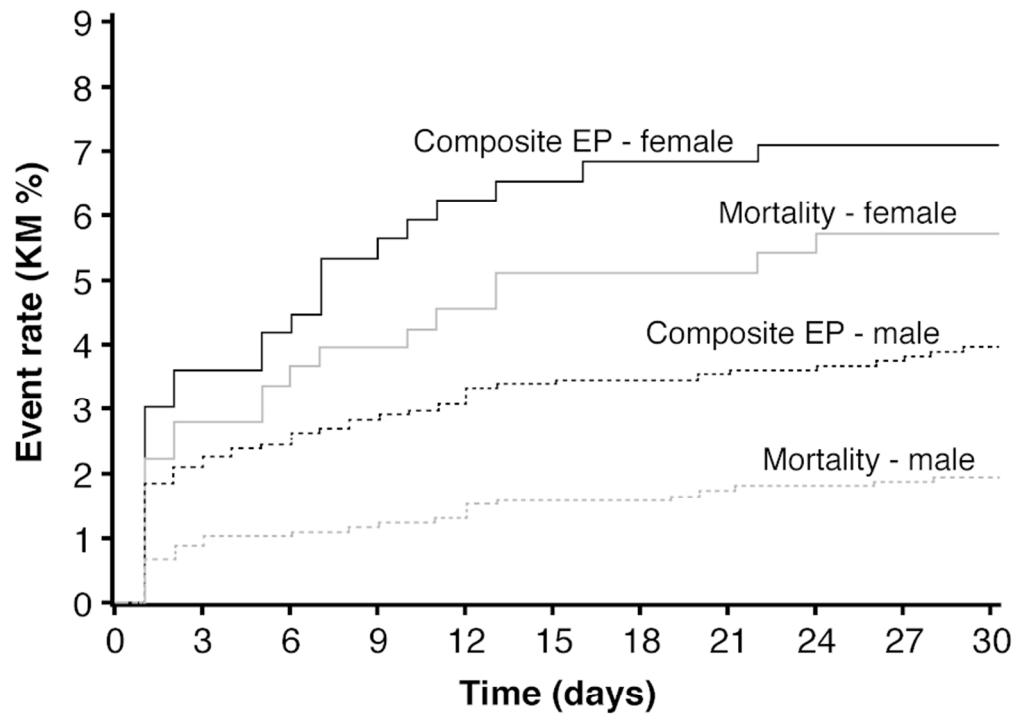**Composite endpoint**

Female 25/369 (6.8%)

Male 58/1489 (3.9%)

**All-cause mortality**

Female 21/369 (5.7%)

Male 28/1489 (1.9%)

Figure 1. Cumulative Kaplan-Meier estimates of the incidence of the composite endpoint of death, MI, stroke, urgent revascularisation or definite acute stent thrombosis and all-cause mortality at 30 days by gender.

79x70mm (300 x 300 DPI)

only

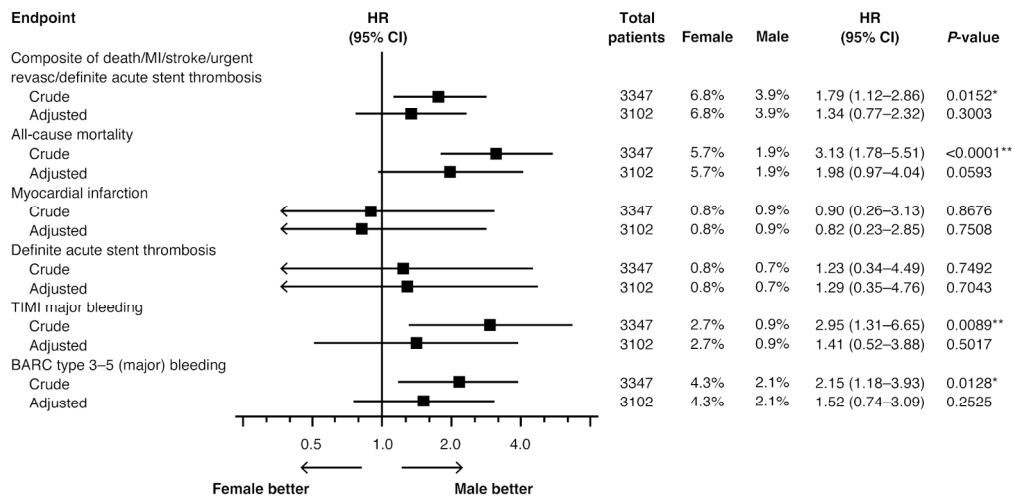

Association between gender and clinical efficacy and safety outcomes independent of randomised treatment.

165x81mm (300 x 300 DPI)

1  
2  
3  
4  
5  
6  
7  
8  
9  
10  
11  
12  
13  
14  
15  
16  
17  
18  
19  
20  
21  
22  
23  
24  
25  
26  
27  
28  
29  
30  
31  
32  
33  
34  
35  
36  
37  
38  
39  
40  
41  
42  
43  
44  
45  
46  
47  
48  
49  
50  
51  
52  
53  
54  
55  
56  
57  
58  
59  
60

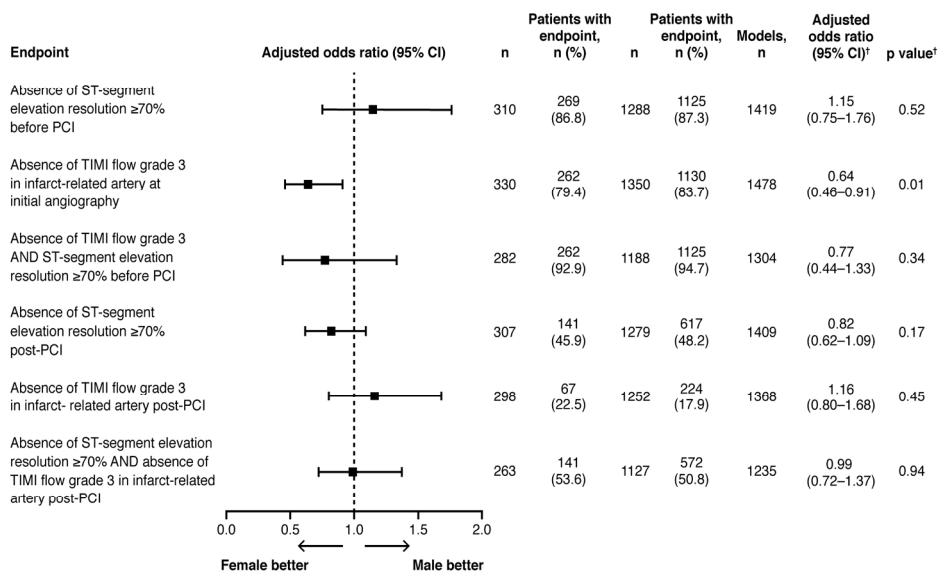

Association between gender and primary and secondary outcomes, independent of randomised treatment.

228x140mm (300 x 300 DPI)

Review only



|                         |                            |
|-------------------------|----------------------------|
| <b>TIMI major bleed</b> | <b>BARC type 3–5 bleed</b> |
| Female 10/369 (2.7%)    | Female 16/369 (4.3%)       |
| Male 14/1489 (0.9%)     | Male 31/1489 (2.1%)        |

Figure 4. Cumulative Kaplan-Meier estimates of the incidence of the TIMI major bleeding and BARC type 3-5 bleeding at 30 days by gender.

79x69mm (300 x 300 DPI)

only

**Supplementary table 1** Association between gender and efficacy of randomised treatment – clinical outcomes

| Outcomes                                                                   | Gender | Pre-hospital ticagrelor (n=906) |                               | In-hospital ticagrelor (n=952) |                               | Model , n | Adjusted hazard ratio ≠ (95% CI) | P-value (interaction) ≠ |
|----------------------------------------------------------------------------|--------|---------------------------------|-------------------------------|--------------------------------|-------------------------------|-----------|----------------------------------|-------------------------|
|                                                                            |        | N                               | Patients with endpoint, n (%) | N                              | Patients with endpoint, n (%) |           |                                  |                         |
| Composite of Death/MI/Stroke/Urgent Revasc/Definite Acute Stent Thrombosis | Female | 173                             | 13 (7.5)                      | 196                            | 12 (6.1)                      | 1613      | 0.98 (0.42-2.27)                 | 0.87                    |
|                                                                            | Male   | 733                             | 28 (3.8)                      | 756                            | 30 (4.0)                      |           | 0.90 (0.51-1.59)                 |                         |
| Composite of Death/MI/Urgent Revasc                                        | Female | 173                             | 13 (7.5)                      | 196                            | 10 (5.1)                      | 1613      | 1.32 (0.55-3.20)                 | 0.55                    |
|                                                                            | Male   | 733                             | 26 (3.5)                      | 756                            | 24 (3.2)                      |           | 0.95 (0.52-1.76)                 |                         |
| All-cause mortality                                                        | Female | 173                             | 13 (7.5)                      | 196                            | 8 (4.1)                       | 1613      | 1.59 (0.61-4.12)                 | 0.93                    |
|                                                                            | Male   | 733                             | 17 (2.3)                      | 756                            | 11 (1.5)                      |           | 1.50 (0.60-3.74)                 |                         |
| Myocardial infarction                                                      | Female | 173                             | 1 (0.6)                       | 196                            | 2 (1.0)                       | 1613      | 0.44 (0.04-4.95)                 | 0.72                    |
|                                                                            | Male   | 733                             | 6 (0.8)                       | 756                            | 8 (1.1)                       |           | 0.72 (0.25-2.09)                 |                         |
| Stroke                                                                     | Female | 173                             | 1 (0.6)                       | 196                            | 2 (1.0)                       | 1613      | 0.54 (0.05-5.90)                 | 0.99                    |
|                                                                            | Male   | 733                             | 3 (0.4)                       | 756                            | 0 (0.0)                       |           | Nt estimated                     |                         |
| Urgent revascularization                                                   | Female | 173                             | 1 (0.6)                       | 196                            | 1 (0.5)                       | 1613      | 0.86 (0.05-14.07)                | 0.76                    |
|                                                                            | Male   | 733                             | 4 (0.5)                       | 756                            | 7 (0.9)                       |           | 0.54 (0.15-1.87)                 |                         |
| Definite Acute Stent Thrombosis                                            | Female | 173                             | 1 (0.6)                       | 196                            | 2 (1.0)                       | 1613      | 0.37 (0.03-4.27)                 | 0.49                    |
|                                                                            | Male   | 733                             | 1 (0.1)                       | 756                            | 9 (1.2)                       |           | 0.12 (0.01-1.02)                 |                         |
| Acute Stent Thrombosis (definite or probable)                              | Female | 173                             | 7 (4.0)                       | 196                            | 4 (2.0)                       | 1613      | 1.31 (0.37-4.69)                 | 0.52                    |
|                                                                            | Male   | 733                             | 14 (1.9)                      | 756                            | 16 (2.1)                      |           | 0.80 (0.35-1.80)                 |                         |

1  
2  
3  
4  
5  
6  
7  
8  
9  
10  
11  
12  
13  
14  
15  
16  
17  
18  
19  
20  
21  
22  
23  
24  
25  
26  
27  
28  
29  
30  
31  
32  
33  
34  
35  
36  
37  
38  
39  
40  
41  
42  
43  
44  
45  
46  
47  
48  
49  
50  
51  
52  
53  
54  
55  
56  
57  
58  
59  
60

≠ Adjusted hazard (for female versus male) and p-values for interaction was calculated from Cox proportional hazard model including gender, age, weight, prior myocardial infarction, prior percutaneous coronary intervention, diabetes, hypertension, non-hemorrhagic stroke, gastrointestinal bleeding, time from symptom onset to pre-hospital ECG, admission Killip class, baseline hemoglobin, estimated glomerular filtration rate, glycoprotein IIb/IIIa inhibitor use during index procedure, location of myocardial infarction

For peer review only



**Supplementary table 2** Association between gender and efficacy of randomised treatment – primary and secondary outcomes

| Outcomes                                                                                                   | Gender | Pre-hospital ticagrelor (n=906) |                               | In-hospital ticagrelor (n=952) |                               | Model N ≠ | Adjusted odds ratio ≠ (95% CI) | P-value (interaction) ≠ |
|------------------------------------------------------------------------------------------------------------|--------|---------------------------------|-------------------------------|--------------------------------|-------------------------------|-----------|--------------------------------|-------------------------|
|                                                                                                            |        | N                               | Patients with endpoint, n (%) | N                              | Patients with endpoint, n (%) |           |                                |                         |
| Absence of ST segment elevation resolution ≥ 70% pre-PCI                                                   | Female | 142                             | 122 (85.9)                    | 168                            | 147 (87.5)                    | 1419      | 0.75 (0.37-1.53)               | 0.71                    |
|                                                                                                            | Male   | 632                             | 550 (87.0)                    | 656                            | 575 (87.7)                    |           | 0.85 (0.59-1.23)               |                         |
| Absence of TIMI flow grade 3 in infarct related artery at initial angiography                              | Female | 155                             | 127 (81.9)                    | 175                            | 135 (77.1)                    | 1478      | 1.36 (0.76-2.41)               | 0.19                    |
|                                                                                                            | Male   | 669                             | 554 (82.8)                    | 681                            | 576 (84.6)                    |           | 0.88 (0.64-1.20)               |                         |
| Absence of ST segment resolution ≥ 70% AND absence of TIMI flow grade 3 in infarct related artery pre-PCI  | Female | 129                             | 120 (93.0)                    | 153                            | 142 (92.8)                    | 1304      | 1.07 (0.41-2.81)               | 0.84                    |
|                                                                                                            | Male   | 590                             | 557 (94.4)                    | 598                            | 568 (95.0)                    |           | 0.96 (0.57-1.62)               |                         |
| Absence of ST-segment resolution ≥70% after PCI                                                            | Female | 144                             | 61 (42.4)                     | 163                            | 80 (49.1)                     | 1409      | 0.76 (0.47-1.25)               | 0.51                    |
|                                                                                                            | Male   | 629                             | 291 (46.3)                    | 650                            | 326 (50.2)                    |           | 0.92 (0.72-1.17)               |                         |
| Absence of TIMI flow grade 3 in infarct related artery after PCI                                           | Female | 144                             | 30 (20.8)                     | 154                            | 37 (24.0)                     | 1368      | 0.93 (0.51-1.71)               | 0.98                    |
|                                                                                                            | Male   | 621                             | 107 (17.2)                    | 631                            | 117 (18.5)                    |           | 0.92 (0.68-1.26)               |                         |
| Absence of ST segment resolution ≥70% AND absence of TIMI flow grade 3 in infarct related artery after PCI | Female | 125                             | 60 (48.0)                     | 138                            | 81 (58.7)                     | 1235      | 0.64 (0.38-1.10)               | 0.13                    |
|                                                                                                            | Male   | 562                             | 282 (50.2)                    | 565                            | 290 (51.3)                    |           | 1.01 (0.78-1.32)               |                         |

1  
2  
3  
4  
5  
6  
7  
8  
9  
10  
11  
12  
13  
14  
15  
16  
17  
18  
19  
20  
21  
22  
23  
24  
25  
26  
27  
28  
29  
30  
31  
32  
33  
34  
35  
36  
37  
38  
39  
40  
41  
42  
43  
44  
45  
46  
47  
48  
49  
50  
51  
52  
53  
54  
55  
56  
57  
58  
59  
60

≠ Adjusted odds ratio (for female versus male) and p-values for interaction was calculated from logistic regression model including gender, age, weight, prior myocardial infarction, prior percutaneous coronary intervention, diabetes, hypertension, non-hemorrhagic stroke, gastrointestinal bleeding, time from symptom onset to pre-hospital ECG, admission Killip class, baseline hemoglobin, estimated glomerular filtration rate, glycoprotein IIb/IIIa inhibitor use during index procedure, location of myocardial infarction

For peer review only

**Supplementary table 3** Association between gender and safety of randomised treatment (safety outcomes)

| End point                                | Gender | Pre-hospital ticagrelor (n=906) |                               | In-hospital ticagrelor (n=952) |                               | Model N ≠ | Adjusted hazard ratio ≠ (95% CI) | P-value (interaction) ≠ |
|------------------------------------------|--------|---------------------------------|-------------------------------|--------------------------------|-------------------------------|-----------|----------------------------------|-------------------------|
|                                          |        | N                               | Patients with endpoint, n (%) | N                              | Patients with endpoint, n (%) |           |                                  |                         |
| PLATO major bleeding                     | Female | 173                             | 6 (3.5)                       | 196                            | 11 (5.6)                      | 1613      | 0.61 (0.21-1.83)                 | 0.23                    |
|                                          | Male   | 733                             | 19 (2.6)                      | 756                            | 14 (1.9)                      |           | 1.39 (0.66-2.93)                 |                         |
| PLATO major and minor bleeding           | Female | 173                             | 7 (4.0)                       | 196                            | 13 (6.6)                      | 1613      | 0.59 (0.22-1.61)                 | 0.19                    |
|                                          | Male   | 733                             | 33 (4.5)                      | 756                            | 26 (3.4)                      |           | 1.27 (0.73-2.21)                 |                         |
| TIMI major bleeding                      | Female | 173                             | 3 (1.7)                       | 196                            | 7 (3.6)                       | 1613      | 0.60 (0.14-2.54)                 | 0.28                    |
|                                          | Male   | 733                             | 9 (1.2)                       | 756                            | 5 (0.7)                       |           | 1.62 (0.53-4.98)                 |                         |
| TIMI major and minor bleeding            | Female | 173                             | 6 (3.5)                       | 196                            | 12 (6.1)                      | 1613      | 0.55 (0.19-1.60)                 | 0.24                    |
|                                          | Male   | 733                             | 29 (4.0)                      | 756                            | 25 (3.3)                      |           | 1.14 (0.64-2.03)                 |                         |
| BARC type 3-5 (major) bleeding           | Female | 173                             | 6 (3.5)                       | 196                            | 10 (5.1)                      | 1613      | 0.69 (0.23-2.11)                 | 0.26                    |
|                                          | Male   | 733                             | 18 (2.5)                      | 756                            | 13 (1.7)                      |           | 1.51 (0.70-3.26)                 |                         |
| BARC type 2-5 (major and minor) bleeding | Female | 173                             | 7 (4.0)                       | 196                            | 13 (6.6)                      | 1613      | 0.59 (0.22-1.60)                 | 0.21                    |
|                                          | Male   | 733                             | 31 (4.2)                      | 756                            | 25 (3.3)                      |           | 1.23 (0.70-2.17)                 |                         |

1  
2  
3  
4  
5  
6  
7  
8  
9  
10  
11  
12  
13  
14  
15  
16  
17  
18  
19  
20  
21  
22  
23  
24  
25  
26  
27  
28  
29  
30  
31  
32  
33  
34  
35  
36  
37  
38  
39  
40  
41  
42  
43  
44  
45  
46  
47  
48  
49  
50  
51  
52  
53  
54  
55  
56  
57  
58  
59  
60

≠Adjusted hazard (for female versus male) and p-values for interaction was calculated from Cox proportional hazard model including gender, age, weight, prior myocardial infarction, prior percutaneous coronary intervention, diabetes, hypertension, non-hemorrhagic stroke, gastrointestinal bleeding, time from symptom onset to pre-hospital ECG, admission Killip class, baseline hemoglobin, estimated glomerular filtration rate, glycoprotein IIb/IIIa inhibitor use during index procedure, location of myocardial infarction

For peer review only

STROBE 2007 (v4) Statement—Checklist of items that should be included in reports of cohort studies

| Section/Topic             | Item # | Recommendation                                                                                                                                                                       | Reported on page # |
|---------------------------|--------|--------------------------------------------------------------------------------------------------------------------------------------------------------------------------------------|--------------------|
| Title and abstract        | 1      | (a) Indicate the study’s design with a commonly used term in the title or the abstract                                                                                               | 2                  |
|                           |        | (b) Provide in the abstract an informative and balanced summary of what was done and what was found                                                                                  | 2                  |
| <b>Introduction</b>       |        |                                                                                                                                                                                      |                    |
| Background/rationale      | 2      | Explain the scientific background and rationale for the investigation being reported                                                                                                 | 4                  |
| Objectives                | 3      | State specific objectives, including any prespecified hypotheses                                                                                                                     | 4                  |
| <b>Methods</b>            |        |                                                                                                                                                                                      |                    |
| Study design              | 4      | Present key elements of study design early in the paper                                                                                                                              | 4,5                |
| Setting                   | 5      | Describe the setting, locations, and relevant dates, including periods of recruitment, exposure, follow-up, and data collection                                                      | 4,5                |
| Participants              | 6      | (a) Give the eligibility criteria, and the sources and methods of selection of participants. Describe methods of follow-up                                                           | 4,5                |
|                           |        | (b) For matched studies, give matching criteria and number of exposed and unexposed                                                                                                  | NA                 |
| Variables                 | 7      | Clearly define all outcomes, exposures, predictors, potential confounders, and effect modifiers. Give diagnostic criteria, if applicable                                             | 5                  |
| Data sources/ measurement | 8*     | For each variable of interest, give sources of data and details of methods of assessment (measurement). Describe comparability of assessment methods if there is more than one group | 5                  |
| Bias                      | 9      | Describe any efforts to address potential sources of bias                                                                                                                            | 5,6                |
| Study size                | 10     | Explain how the study size was arrived at                                                                                                                                            | N/A                |
| Quantitative variables    | 11     | Explain how quantitative variables were handled in the analyses. If applicable, describe which groupings were chosen and why                                                         | 5,6                |
| Statistical methods       | 12     | (a) Describe all statistical methods, including those used to control for confounding                                                                                                | 5, 6               |
|                           |        | (b) Describe any methods used to examine subgroups and interactions                                                                                                                  | 5, 6               |
|                           |        | (c) Explain how missing data were addressed                                                                                                                                          | 6                  |
|                           |        | (d) If applicable, explain how loss to follow-up was addressed                                                                                                                       | N/A                |
|                           |        | (e) Describe any sensitivity analyses                                                                                                                                                | 6                  |
| <b>Results</b>            |        |                                                                                                                                                                                      |                    |

|                          |     |                                                                                                                                                                                                                                                                                                                                                                                                               |                          |
|--------------------------|-----|---------------------------------------------------------------------------------------------------------------------------------------------------------------------------------------------------------------------------------------------------------------------------------------------------------------------------------------------------------------------------------------------------------------|--------------------------|
| Participants             | 13* | (a) Report numbers of individuals at each stage of study—eg numbers potentially eligible, examined for eligibility, confirmed eligible, included in the study, completing follow-up, and analysed<br>(b) Give reasons for non-participation at each stage<br>(c) Consider use of a flow diagram                                                                                                               | 4<br><br>NA (SEE PAGE 4) |
| Descriptive data         | 14* | (a) Give characteristics of study participants (eg demographic, clinical, social) and information on exposures and potential confounders<br>(b) Indicate number of participants with missing data for each variable of interest<br>(c) Summarise follow-up time (eg, average and total amount)                                                                                                                | 7, 8, 9<br>6<br>NA       |
| Outcome data             | 15* | Report numbers of outcome events or summary measures over time                                                                                                                                                                                                                                                                                                                                                | 9, 10, 11, 12            |
| Main results             | 16  | (a) Give unadjusted estimates and, if applicable, confounder-adjusted estimates and their precision (eg, 95% confidence interval). Make clear which confounders were adjusted for and why they were included<br>(b) Report category boundaries when continuous variables were categorized<br>(c) If relevant, consider translating estimates of relative risk into absolute risk for a meaningful time period | 9, 10, 11, 12<br>yes     |
| Other analyses           | 17  | Report other analyses done—eg analyses of subgroups and interactions, and sensitivity analyses                                                                                                                                                                                                                                                                                                                | 10                       |
| <b>Discussion</b>        |     |                                                                                                                                                                                                                                                                                                                                                                                                               |                          |
| Key results              | 18  | Summarise key results with reference to study objectives                                                                                                                                                                                                                                                                                                                                                      | 13, 14                   |
| <b>Limitations</b>       |     |                                                                                                                                                                                                                                                                                                                                                                                                               |                          |
| Interpretation           | 20  | Give a cautious overall interpretation of results considering objectives, limitations, multiplicity of analyses, results from similar studies, and other relevant evidence                                                                                                                                                                                                                                    | 13, 14                   |
| Generalisability         | 21  | Discuss the generalisability (external validity) of the study results                                                                                                                                                                                                                                                                                                                                         | NA                       |
| <b>Other information</b> |     |                                                                                                                                                                                                                                                                                                                                                                                                               |                          |
| Funding                  | 22  | Give the source of funding and the role of the funders for the present study and, if applicable, for the original study on which the present article is based                                                                                                                                                                                                                                                 | 17                       |

\*Give information separately for cases and controls in case-control studies and, if applicable, for exposed and unexposed groups in cohort and cross-sectional studies.

**Note:** An Explanation and Elaboration article discusses each checklist item and gives methodological background and published examples of transparent reporting. The STROBE checklist is best used in conjunction with this article (freely available on the Web sites of PLoS Medicine at <http://www.plosmedicine.org/>, Annals of Internal Medicine at <http://www.annals.org/>, and Epidemiology at <http://www.epidem.com/>). Information on the STROBE Initiative is available at [www.strobe-statement.org](http://www.strobe-statement.org).

# BMJ Open

## Association between gender and short term outcome in STEMI patients planned for primary PCI and novel antiplatelet therapy.

**A pre-specified gender analysis of the Administration of Ticagrelor in the Cath Lab or in the Ambulance for New ST Elevation Myocardial Infarction to Open the Coronary Artery (ATLANTIC) trial – a multicenter, randomised, placebo-controlled study.**

|                                 |                                                                                                                                                                                                                                                                                                                                                                                                                                                                                                                                                                                                                                                                                                                                                                                                                                                                                                                       |
|---------------------------------|-----------------------------------------------------------------------------------------------------------------------------------------------------------------------------------------------------------------------------------------------------------------------------------------------------------------------------------------------------------------------------------------------------------------------------------------------------------------------------------------------------------------------------------------------------------------------------------------------------------------------------------------------------------------------------------------------------------------------------------------------------------------------------------------------------------------------------------------------------------------------------------------------------------------------|
| Journal:                        | <i>BMJ Open</i>                                                                                                                                                                                                                                                                                                                                                                                                                                                                                                                                                                                                                                                                                                                                                                                                                                                                                                       |
| Manuscript ID                   | bmjopen-2016-015241.R2                                                                                                                                                                                                                                                                                                                                                                                                                                                                                                                                                                                                                                                                                                                                                                                                                                                                                                |
| Article Type:                   | Research                                                                                                                                                                                                                                                                                                                                                                                                                                                                                                                                                                                                                                                                                                                                                                                                                                                                                                              |
| Date Submitted by the Author:   | 07-May-2017                                                                                                                                                                                                                                                                                                                                                                                                                                                                                                                                                                                                                                                                                                                                                                                                                                                                                                           |
| Complete List of Authors:       | Venetsanos, Dimitrios; Department of Medical and Health Sciences, Cardiology<br>Sederholm Lawesson, Sofia; Department of Medical and Health Sciences, Division of Cardiovascular Medicine;<br>Alfredsson, Joakim; Department of Cardiology and Department of Medical and Health Sciences, Linköping University, Linköping, Sweden<br>Janzon, magnus; Linköping University, Department of Medical and Health Sciences, Division of Cardiology<br>Cequier, Angel<br>Chettibi, Mohamed; Centre Hospito-universitaire Frantz Fanon, Blida, Algeria<br>Goodman, Shaun; Canadian Heart Research Centre, Division of Cardiology, St Michael's Hospital, University of Toronto, Toronto<br>van 't Hof, Arnoud; Isala Klinieken, Cardiology<br>Montalescot, Gilles; UPMC Sorbonne Universités, ACTION Study Group, INSERM-UMRS 1166, Institut de Cardiologie, Pitié-Salpêtrière Hospital (AP-HP) – Paris, France<br>Swahn, Eva |
| <b>Primary Subject Heading</b>: | Cardiovascular medicine                                                                                                                                                                                                                                                                                                                                                                                                                                                                                                                                                                                                                                                                                                                                                                                                                                                                                               |
| Secondary Subject Heading:      | Medical management                                                                                                                                                                                                                                                                                                                                                                                                                                                                                                                                                                                                                                                                                                                                                                                                                                                                                                    |
| Keywords:                       | Myocardial infarction < CARDIOLOGY, STEMI, gender, ticagrelor, PCI                                                                                                                                                                                                                                                                                                                                                                                                                                                                                                                                                                                                                                                                                                                                                                                                                                                    |
|                                 |                                                                                                                                                                                                                                                                                                                                                                                                                                                                                                                                                                                                                                                                                                                                                                                                                                                                                                                       |

SCHOLARONE™  
Manuscripts

20170425

## Association between gender and short term outcome in STEMI patients planned for primary PCI and novel antiplatelet therapy.

A pre-specified gender analysis of the Administration of Ticagrelor in the Cath Lab or in the Ambulance for New ST Elevation Myocardial Infarction to Open the Coronary Artery (ATLANTIC) trial – a multicenter, randomised, placebo-controlled study.

D. Venetsanos<sup>1</sup>, S. Sederholm Lawesson<sup>1</sup>, J. Alfredsson<sup>1</sup>, M. Janzon<sup>1</sup>, A. Cequier<sup>2</sup>, M. Chettibi<sup>3</sup>, S.G. Goodman<sup>4</sup>, A.W. van't Hof<sup>5</sup>, G. Montalescot<sup>6</sup>, E. Swahn<sup>1\*</sup>

<sup>1</sup>Department of Cardiology and Department of Medical and Health Sciences, Linköping University, Linköping, Sweden; <sup>2</sup>Heart Disease Institute, Hospital Universitario de Bellvitge, University of Barcelona, L'Hospitalet de Llobregat, Barcelona, Spain; <sup>3</sup>Centre Hospitalo-universitaire Frantz Fanon, Blida, Algeria; <sup>4</sup>Canadian Heart Research Centre, Division of Cardiology, St Michael's Hospital, University of Toronto, Toronto, Canada; <sup>5</sup>Department of Cardiology, Isala Clinics, Zwolle, Netherlands; <sup>6</sup>UPMC Sorbonne Universités, ACTION Study Group, INSERM-UMRS 1166, Institut de Cardiologie, Pitié-Salpêtrière Hospital (AP-HP) – Paris, France

**Keywords: myocardial infarction, STEMI, gender, primary PCI, ATLANTIC, ticagrelor**

**\*Corresponding author:** Dimitrios Venetsanos, Department of Cardiology and Department of Medical and Health Sciences, Linköping University, SE 58183 Linköping, Sweden.

E-mail: dimitrios.venetsanos@liu.se



20170425

## Abstract

### Objectives

To evaluate gender differences in outcomes in STEMI patients planned for PPCI

### Settings

A pre-specified gender analysis of the multicenter, randomised, double-blind ATLANTIC trial

### Participants

Between September 2011 and October 2013, 1862 patients with STEMI and symptom duration less than 6 hours were included

### Interventions

Patients were assigned to pre-hospital versus in-hospital administration of 180mg ticagrelor.

### Outcomes

The main objective was to study the association between gender and primary and secondary outcomes of the main study with a focus on the clinical efficacy and safety outcomes.

Primary: The proportion of patients who did not have  $\geq 70\%$  resolution of ST segment elevation and did not meet the criteria for TIMI flow 3 at initial angiography. Secondary: the composite of death, MI, stent thrombosis, stroke, or urgent revascularisation and major or minor bleeding at 30 days.

### Results

Women were older, had higher TIMI risk score, longer pre-hospital delays and better TIMI flow in the infarct related artery. Women had a 3-fold higher risk for all-cause mortality compared to men (5.7% vs 1.9%, HR 3.13, 95% CI 1.78 – 5.51). After adjustment, the difference was attenuated but remained statistically significant (HR 2.08, 95% CI 1.03 – 4.20). The incidence of major bleeding events was 2 to 3-fold higher in women compared to men. In the multivariable model, female gender was not an independent predictor of bleeding (PLATO major HR 1.45, 95% CI 0.73-2.86, TIMI major HR 1.28, 95% CI 0.47-3.48, BARC type 3-5 HR 1.45, 95% CI 0.72-2.91). There was no interaction between gender and efficacy or safety of randomised treatment.

### Conclusion

20170425

1  
2  
3 In STEMI patients planned for PPCI-techniques and treated with modern antiplatelet therapy,  
4 female gender was an independent predictor of short term mortality. In contrast, the higher  
5 incidence of bleeding complications in women could mainly be explained by older age and  
6 clustering of comorbidities..  
7  
8  
9

10  
11  
12  
13 **CLINICAL TRIAL REGISTRATION:** clinicaltrials.gov identifier: NCT01347580.  
14

### 15 16 17 **Strengths and limitations** 18

- 19 • This is a prespecified analysis of a randomised control trial
- 20 • All patients were planned for primary PCI
- 21 • Current PCI techniques and novel antiplatelet therapy were used
- 22 • Appropriate statistical methods used to adjust for baseline differences between  
23 genders
- 24 • The large imbalance in the proportion of men and women included caused a reduced  
25 study power for definitely excluding significant differences in outcomes  
26  
27  
28  
29  
30  
31  
32  
33  
34  
35  
36  
37  
38  
39  
40  
41  
42  
43  
44  
45  
46  
47  
48  
49  
50  
51  
52

### 53 **Introduction** 54

55 Recent studies have provided evidence of gender differences in the pathophysiology and the  
56 clinical expression of atherosclerosis.(1) Several registries in patients with ST-segment  
57  
58  
59  
60

20170425

1  
2  
3 elevation myocardial infarction (STEMI) have consistently shown a considerably higher risk  
4 of adverse outcomes in women compared to men. Nevertheless, there are conflicting results  
5 regarding whether gender is an independent contributor to this observation or the higher risk  
6 in women depends on differences in baseline characteristics and comorbidities between  
7 genders.(2-8) Although registries of STEMI patients usually include large, unselected  
8 populations, they share some inherent limitations. Their results are certainly influenced by  
9 differences between genders in the use of timely reperfusion therapy and evidence based drug  
10 therapies as well as undetected confounding factors.(9, 10) Therefore, reports of gender-  
11 based analyses of randomised controlled trials are of crucial importance in an effort to  
12 minimise inequality in the management and evaluate gender as a potential independent risk  
13 factor for adverse outcome. Only a few randomised trials of STEMI patients treated with  
14 primary PCI (PPCI) have reported results in the context of gender.(11, 12) New treatments  
15 (e.g. ticagrelor or prasugrel), special efforts to reduce bleeding (i.e. increased use of radial  
16 arterial access, provisional rather than routine use of glycoprotein (GP) IIb/IIIa inhibitor),  
17 shorter delay times to reperfusion and a growing awareness regarding gender differences in  
18 the management and importance of adherences to evidence based treatment could contribute  
19 to improved ischemic and bleeding outcomes in female STEMI patients.

20  
21 In the ATLANTIC trial, prehospital administration of ticagrelor appeared to be safe but did  
22 not significantly improve outcome compared to in hospital administration in patients with  
23 STEMI, treated with PPCI according to the current modern standards.(13)

24  
25 We present a pre-specified gender analysis of the ATLANTIC trial, with the aim of studying  
26 the association between gender and outcome.  
27  
28  
29  
30

## 31 32 33 34 35 36 37 38 39 40 41 42 **Methods**

43  
44 The ATLANTIC study was an international, randomised, double-blind, placebo-controlled  
45 study with 30 days follow-up. The design of the study, inclusion and exclusion criteria,  
46 outcome definitions and principal results have previously been described.(13, 14) Briefly,  
47 1862 patients presenting with STEMI, less than 6 hours after symptom onset, were included  
48 and randomised to pre-hospital (in the ambulance) versus in-hospital (in the catheterisation  
49 laboratory) treatment with a loading dose of ticagrelor (180mg) in addition to aspirin and  
50 standard clinical care. All patients were to subsequently receive ticagrelor 90 mg twice daily  
51 for 30 days, after which it was recommended that ticagrelor should be continued for up to 12  
52 months. Pre-hospital administration of a GP IIb/IIIa inhibitor was left to the physician's  
53  
54  
55  
56  
57  
58  
59  
60

20170425

1  
2  
3 discretion. Peri-procedural use of parenteral anticoagulants was also left to the physician's  
4 discretion, according to the local practice.  
5  
6

7 The proportion of patients who did not have  $\geq 70\%$  resolution of ST segment elevation before  
8 PCI and / or did not meet the criteria for TIMI flow 3 in the infarct related artery (IRA) at  
9 initial angiography was the primary outcome of the ATLANTIC trial. Secondary outcomes  
10 (clinical efficacy outcomes) included the composite of death, MI, stent thrombosis, stroke, or  
11 urgent revascularisation at 30 days and definite stent thrombosis at 30 days. Safety outcomes  
12 included major and minor bleeding over the 30-day treatment period. Bleeding risk was  
13 evaluated using the TIMI (The Thrombolysis In Myocardial Infarction), BARC (Bleeding  
14 Academic Research Consortium) and PLATO (Study of Platelet Inhibition and Patient  
15 Outcomes) bleeding definitions.(14)  
16  
17  
18  
19  
20  
21

22 The main objective of our analysis was to study the association between gender and primary  
23 and secondary outcomes of the main study with a special focus on the clinical efficacy and  
24 safety outcomes. The interaction of gender subgroups with randomised treatment effects was  
25 also investigated.  
26  
27  
28

29 The trial design and protocol were approved by the national regulatory authorities in all the  
30 participating countries and by the local ethics committee or institutional review board at each  
31 participating site. All patients provided written informed consent.  
32  
33  
34  
35  
36  
37

### 38 **Statistical analysis**

39 Continuous variables are presented by their mean and standard deviation (SD) or median and  
40 25<sup>th</sup> -75th percentiles as appropriate. Categorical variables are presented as counts and  
41 percentages. Baseline and peri-procedural characteristics were compared according to gender  
42 by chi-square tests for categorical variables and Student's t-test or Mann Whitney U test for  
43 continuous variables, depending on if the variable of interest was normally distributed or not.  
44 A p-value  $< 0.05$  is considered to indicate statistical significance.  
45  
46  
47  
48

49 The incidence of events over time by gender is presented by Kaplan-Meier curves.  
50

51 In order to study the association between gender and the clinical efficacy and safety  
52 outcomes, independent of randomised treatment as well as the possible interactions between  
53 gender and randomised treatment with respect to the outcomes, hazard ratios [HR] with 95%  
54 confidence intervals [CI] were derived from Cox proportional-hazards models. In the  
55  
56  
57  
58  
59  
60

20170425

1  
2  
3 unadjusted (crude) model, gender was the only explanatory variable whereas in the adjusted  
4 multivariable model, gender was forcibly included and the other variables were chosen by  
5 using a forward stepwise selection algorithm with a significant cut-off level of 0.05 for  
6 inclusion. Adjustment variables included age, weight, prior MI, prior PCI, history of diabetes,  
7 hypertension, non-hemorrhagic stroke, gastrointestinal bleeding, time from symptom onset to  
8 pre-PCI electrocardiogram [ECG], admission Killip class (as a dichotomous variable 1 / >1),  
9 baseline hemoglobin, estimated glomerular filtration rate (eGFR) according to the MDRD  
10 formula, access site, use of GP IIIb/IIa inhibitor, bivalirudin and UFH, location of MI and  
11 revascularisation. To evaluate the importance of early mortality, a landmark analysis of the  
12 clinical efficacy outcomes was also performed from 48 hours after randomisation (arbitrarily  
13 defined) to the end of the study. In order to explore the importance of bleeding on the clinical  
14 efficacy outcomes, a separate analysis was also performed by censoring the patients who  
15 reported a PLATO major bleeding at the time of the onset of a bleeding event.

16  
17  
18  
19  
20  
21  
22  
23  
24  
25 A comparable statistical process was used to compare gender differences in the effect of  
26 randomised treatment by constructing logistic regression models. Odds ratios [OR] with 95%  
27 CI are presented. The above process for Cox regression and logistic regression was also used  
28 to explore the interaction effect of gender and treatment.

29  
30  
31  
32 For most of the variables included in the multivariable models, only few patients had missing  
33 data (<10 patients). However, 7% of patients had missing values for creatinine, 5% for  
34 hemoglobin and 4% for Killip class. The number of patients with complete data for  
35 multivariable Cox proportional-hazard models of the primary outcome was 1613 (88%).

36  
37  
38  
39 All the analyses were performed using SAS<sup>®</sup> version 9.3.  
40  
41  
42  
43  
44  
45

## 46 Results

### 47 Baseline and peri-procedural characteristics stratified by gender

#### 48 *Demographic and clinical characteristics*

49  
50  
51  
52  
53 The study population consisted of 369 (20 %) women. They were older (mean age 69 vs. 59  
54 years,  $p < 0.01$ ), had lower body mass index (BMI), higher TIMI risk score, more often had a  
55 history of hypertension, chronic obstructive pulmonary disease (COPD) and stroke. Men had  
56  
57  
58  
59  
60

20170425

1  
2  
3 more frequent prior PCI. No difference was observed between genders with respect to acute  
4 heart failure (Killip class > 1) and only a minority of patients presented with cardiogenic  
5 shock (**Table 1**).

#### 8 9 *Time delays*

10 Women had significantly longer delay times, both from symptom onset to prehospital ECG  
11 (median 88 vs 70 minutes,  $p<0.01$ ) and from pre-PCI to post-PCI angiography (median 36 vs  
12 32 minutes,  $p=0.03$ ).

#### 13 14 15 16 17 *Procedural characteristics, angiographic findings, and medication during the index event*

18 Coronary angiography was more often performed by femoral access in women (39.7% vs  
19 30.4%,  $p<0.01$ ). The genders did not differ according to IRA, with the left anterior  
20 descending artery involved in 38% of women and 39% of men. PPCI, with or without stent,  
21 was performed significantly more often in men (88.5% vs 83.7%,  $p<0.01$ ) whereas the use of  
22 drug eluting stents (DES) was similar. Thromboaspiration, GP IIb/IIIa inhibitors and  
23 intravenous anticoagulants were used less often in women. (**Table 1**)

#### 24 25 26 27 28 29 30 **Association between gender and outcomes independent of randomised treatment**

31 Female gender was associated with significantly higher risk for the composite outcome of  
32 death, MI, stroke, urgent revascularisation or definite acute stent thrombosis compared to  
33 male gender (6.8% vs 3.9%, crude HR 1.79, 95% CI 1.12 – 2.86) (**Figure 1**). This difference  
34 was mainly driven by a 3-fold higher risk for all-cause mortality in women compared to men  
35 (5.7% vs 1.9%, HR 3.13, 95% CI 1.78 – 5.51). Although the difference was attenuated in the  
36 multivariable model, gender was still associated with all-cause mortality at 30 days (HR 2.08,  
37 95% CI 1.03 – 4.20) (**Figure 2 and table 2**). Landmark analysis for events occurring within  
38 48 hours, and between 48 hours and 30 days showed that 38% of the women and 36% of the  
39 men who did not survive the first month died within 48 hours. Comparison after excluding  
40 patients from further analysis at the time point of a PLATO major bleeding event still  
41 revealed a statistically significant association between women and all-cause mortality (4.3%  
42 vs 1.4%. HR 3.20, 95% CI 1.67 – 6.13). Similar result was obtained after adjustment but the  
43 difference between genders did not reach statistical significance (HR 2.15, 95% CI 0.93-  
44 5.00).

45  
46  
47  
48  
49  
50  
51  
52  
53  
54  
55  
56 Female gender was associated with lower risk for TIMI flow < 3 in the IRA at initial  
57 angiography (adjusted OR 0.67, 95% CI 0.47-0.96). The risk of incomplete ST-segment  
58  
59  
60

20170425

1  
2  
3 elevation resolution (<70%) before PCI did not differ significantly between the genders  
4 (adjusted OR 1.11, 95% CI 0.73-1.71). The risk of abnormal TIMI flow in the IRA and  
5 incomplete ST segment elevation resolution after PCI was similar in both genders (**Figure 3**).

6  
7  
8 Women had significantly higher risk for major bleeding complications compared to men,  
9 irrespective of the bleeding definition used (30-day PLATO major bleeding 4.6% vs 2.2%,  
10 HR 2.15, 95% CI 1.18 – 3.85, TIMI major bleeding at 30 days 2.7% vs 0.9%, HR 2.95, 95%  
11 CI 1.31 – 6.65, BARC type 3-5 bleeding 4.3% vs 2.1%, HR 2.15, 95% CI 1.18 – 3.93)  
12 (**Figure 4**). However, after adjustment for baseline and clinical characteristics, female gender  
13 was no longer an independent predictor of risk for bleeding at 30 days. (**Table 2 and figure**  
14 **2**)

### 20 **Association between gender and efficacy and safety of randomised treatment**

21 Pre-hospital administration of ticagrelor compared to in-hospital administration resulted in a  
22 non- significant difference in the primary, secondary and safety outcomes. No significant  
23 interactions between randomised treatment and gender in terms of these outcomes were found  
24 in the unadjusted or adjusted model (test for interaction in the multivariable models; p=0.94  
25 for all-cause mortality, p=0.55 for absence of TIMI flow grade 3 in the IRA at initial  
26 angiography, p=0.71 for absence of  $\geq 70\%$  resolution of pre-PCI ST segment elevation, and  
27 p=0.31 for TIMI major bleeding at 30 days). (**Supplementary tables 1, 2 and 3**).

## 38 **Discussion**

39 In the present analysis, unadjusted data showed a significantly higher risk of short term  
40 mortality and bleeding complications in women. After multivariable adjustment female  
41 gender remained an independent predictor of mortality whereas advanced age and  
42 comorbidities could mainly explain the higher incidence of bleeding complications in  
43 women.

44 Undoubtedly, older age and clustering of comorbidities in women could explain a large part  
45 of the observed difference in short term clinical outcomes in our study. However, the adjusted  
46 risk for death was still significantly higher in women. The contribution of gender, as  
47 independent risk factor, on adverse outcome may depend on the population studied. The age  
48 gap between genders in our population was substantially higher compared to previous  
49 studies, with a mean age difference of 10 years.(12, 15) In spite of appropriate statistical



20170425

1  
2  
3 methods that were used for adjustment, adjustment for such age-difference is awkward.  
4 Additionally, the age difference may indicate a selection bias. As identification and  
5 randomisation took place in the ambulance, young women with suspected STEMI were  
6 possibly not included in the study as alternative reasons for ST-segment elevation on  
7 prehospital ECG may have been considered more plausible in this group. Furthermore, a  
8 trend toward increased mortality with prehospital ticagrelor was observed in the ATLANTIC  
9 trial that was mainly attributed to a plausible imbalance between the two groups in terms of  
10 the severity of the presenting event. Given the low rate of all-cause mortality, unobserved  
11 confounders in elderly women with STEMI may have significantly contributed to our results  
12 and the findings of the main study. These factors may have a significant impact on the  
13 remaining higher adjusted risk for short-term mortality in women.  
14  
15  
16  
17  
18  
19  
20

21  
22 Previous observational studies in STEMI cohorts, without focus on PPCI treated patients  
23 have shown a higher risk for early mortality in women.(6, 16, 17) Significant differences in  
24 the rate of reperfusion therapy between genders and hidden confounders such as frailty in  
25 elderly women with STEMI may have influenced their results. Recent observational studies  
26 including patients treated with PPCI(4, 18, 19) and pre-specified gender analysis of RCTs(11,  
27 12, 15, 20, 21) have shown that the impact of gender on mortality could mainly be explained  
28 by differences in age and comorbidities between genders.. On the contrary, an observational  
29 study and a meta-analysis have reported higher multivariable adjusted risk of early mortality  
30 in women with STEMI treated with PPCI.(22, 23) Differences in the population studied and  
31 in the covariates included in the multivariable analysis between studies may explain the  
32 conflicting results. Previous studies have clearly demonstrated the importance of body  
33 surface area and the eGFR on prognosis.(24, 25) In a meta-analysis, Berger et al showed that  
34 female gender was an independent predictor of early mortality in STEMI patients. However,  
35 30-day mortality was not statistically significant different between genders after additional  
36 adjustment for angiographic disease severity.(26)  
37  
38  
39  
40  
41  
42  
43  
44  
45  
46

47 In the present study, women had a 2-3 times higher unadjusted risk for non-CABG related  
48 bleedings, depending on the definition used. After adjustment for baseline characteristics, no  
49 significant difference remained. Female gender has previously been associated with higher  
50 risk for bleeding complications in patients with ACS.(27-30) Known predictors of bleedings  
51 like advanced age, diabetes, hypertension, renal insufficiency and anemia, are usually more  
52 often encountered in women with STEMI.(31) Additionally, smaller body and vessel size,  
53 higher use of femoral access and overdosing of antithrombotic medication in women may  
54  
55  
56  
57  
58  
59  
60



20170425

1  
2  
3 explain the higher observed risk for bleeding. Procedural-related improvement such as  
4 increased use of radial access or smaller femoral sheaths and careful dose adjustment of  
5 antithrombotic medication, have resulted in a significant decline in the risk of  
6  
7 bleeding/vascular complication during cardiovascular interventions the last years and have  
8 probably contributed to our results.(32) The negative impact of bleedings on prognosis in  
9 patients with STEMI is well established. (31) Our data showed that even after excluding  
10 patients from further analysis at the time of a PLATO major bleeding, the HR for early  
11 mortality in women vs men remained unchanged, implying that reducing the rate of major  
12 bleeding in women may improve their prognosis but is not the main reason for the observed  
13 difference between genders in the early mortality.  
14  
15  
16  
17  
18  
19  
20  
21

22  
23 Some well-known gender disparities in the concomitant management of STEMI patients  
24 remained unchanged. Women were less likely to be treated with GP IIb/IIIa inhibitors and  
25 thrombo-aspiration during PPCI despite lack of gender difference in protection from major  
26 adverse outcomes by GP IIb/IIIa inhibitors (33) and benefit of thrombo-aspiration at the time  
27 when the study was conducted.(34) Similar findings have been provided by large  
28 registries.(7, 8) Some of these lower rates of utilization may be “appropriate” given the  
29 higher TIMI 3 flow rates in the IRA pre-PPCI and lower rates of PPCI in women vs. men.  
30 Furthermore, physician’s concern for higher risk of bleeding in older women with STEMI  
31 have certainly contributed to the lower use of GP IIb/IIIa inhibitors in women.  
32  
33  
34  
35  
36  
37

38 Although the impact of early reperfusion on mortality in STEMI patients is now  
39 unquestionable,(35) patients’ delay from symptom onset to prehospital ECG was not an  
40 independent predictor of mortality in our study, in agreement with results from previous  
41 gender analyses.(36, 37) A plausible explanation is an association between age and delay,  
42 and thus adjustment for age minimizes the relative impact of delay. Furthermore, in PPCI,  
43 female gender has been associated with similar or even smaller infarct size than that in male  
44 gender, due to longer prehospital delays, indicating that other factors than larger infarct size  
45 secondary to longer prehospital delay mainly contribute to the observed higher unadjusted  
46 short term mortality.(36) The proportion of 30 day mortality that occurred within 48 hours of  
47 admission was similar in women and men (38% vs 36% respectively) contrasting previous  
48 data where gender differences in early mortality were accounted for by excess very early  
49 (within 24-48 hours) deaths in women with STEMI.(7, 17) Cardiogenic shock and  
50  
51  
52  
53  
54  
55  
56  
57  
58  
59  
60

20170425

1  
2  
3 hemodynamic instability were key exclusion criteria in the ATLANTIC trial which may have  
4 influenced these results. Cardiogenic shock has been shown to be more common in women  
5 and female gender has been highly associated with mortality in shock patients.(19)  
6  
7

8  
9 In terms of ST-segment elevation resolution and TIMI flow 3 rates before and after PCI, no  
10 significant difference between genders was observed apart from a lower risk of abnormal  
11 coronary flow in IRA at initial angiography in women. The higher rate of TIMI flow 3 at  
12 initial angiography may be explained by the higher rate of normal coronary arteries as well as  
13 the less obstructive coronary artery disease in women with STEMI, which is in concordance  
14 with previous data.(37)  
15  
16  
17

18  
19 The analysis of the effect of gender on outcomes dependent on the randomised treatment  
20 showed no statistically significant interactions. Pre-hospital administration of ticagrelor did  
21 not improve pre- or post-PCI coronary reperfusion as assessed by TIMI flow in IRA and  
22 resolution of ST elevation pre-PCI. Clinical efficacy outcomes were not significantly  
23 improved either. However, prehospital administration of ticagrelor was safe in both genders  
24 with similar rate of major and minor bleedings.  
25  
26  
27  
28  
29

### 30 31 **Strengths and limitations** 32

33 The present study has some important limitations. The ATLANTIC trial was not stratified by  
34 gender. The large imbalance in the proportion of men and women included, commonly  
35 encountered in a STEMI population, caused a reduced power for detecting or definitely  
36 excluding significant differences in some outcomes between the genders or to definitely  
37 exclude an interaction between gender and the randomised treatment.  
38  
39  
40  
41

42 The current study was planned as a pre-specified gender analysis in the randomised,  
43 controlled ATLANTIC trial. The most important strength of our analysis is that patients were  
44 treated according to the current guidelines of STEMI, with PPCI as the reperfusion strategy  
45 of choice, administration of the modern ADP receptor-blocker ticagrelor in addition to aspirin  
46 as soon as possible after the first medical contact, high use of radial access during  
47 catheterisation and adjuvant pharmacologic treatment during PPCI with UFH or bivalirudin.  
48 (38) Therefore our study provides important information about differences and similarities  
49 between genders in STEMI patients treated with current PCI techniques and pharmacologic  
50 treatment.  
51  
52  
53  
54  
55  
56  
57  
58  
59  
60

20170425

## Conclusion

In patients with STEMI, planned for PPCI and treated with modern antiplatelet therapy, female gender identifies a group of patients with high risk of early mortality in whom prompt efforts to improve outcome are warranted. Female gender was not an independent predictor of bleeding but advanced age and clustering of comorbidities in women could mainly explain their higher unadjusted risk for bleeding events compared to men. Prehospital administration of ticagrelor had a similar efficacy and safety profile in men and women with STEMI.

For peer review only

20170425

## Acknowledgements

Statistical analysis was performed by Richard Cairns from Worldwide Clinical Trials UK. The authors would like to thank all patients who took part in this study. Editorial support was provided by Liz Anfield, Prime Medica Ltd, Knutsford, Cheshire, and was funded by AstraZeneca.

## Funding statement

The main ATLANTIC trial was financed by AstraZeneca. Editorial support for this study was funded by AstraZeneca.

## Data sharing statement

Original data are available on request. Please contact the corresponding author for further information.

## Interest statement

D.V. reports that he has no relationships relevant to the contents of this paper to disclose.

S.S.L. reports that she has no relationships relevant to the contents of this paper to disclose.

J.A. reports receiving lecture fees from AstraZeneca.

M.J. reports receiving lecture fees from AstraZeneca and Sanofi.

A.C. reports that he has no relationships relevant to the contents of this paper to disclose.

M.C. reports that he has no relationships relevant to the contents of this paper to disclose.

S.G.G. reports receiving research grants and speaker/consulting honoraria from AstraZeneca, Daiichi Sankyo, Eli Lilly, Sanofi, Bristol-Myers Squibb, Merck, and The Medicines Company.

A.W. v.H. reports receiving research and educational grants from Abbott, AstraZeneca, Eli Lilly/Daiichi Sankyo, Merck/Correio, Medtronic, and The Medicines Company and speaker fees from Boehringer Ingelheim, Abbott, AstraZeneca, Eli Lilly/Daiichi Sankyo, Merck/Correio, Medtronic, The Medicines Company, Pfizer, and Sanofi.

G.M. reports receiving research grants to the Institution or consulting/lecture fees from Acuitude, ADIR, Amgen, AstraZeneca, Bayer, Berlin Chimie AG, Boehringer Ingelheim, Bristol-Myers Squibb, Brigham Women's Hospital, Cardiovascular Research Foundation, Celladon, CME resources, Daiichi-Sankyo, Eli-Lilly, Europa, Fédération Française de Cardiologie, Gilead, Hopitaux Universitaires Genève, ICAN, Janssen-Cilag, Lead-Up, Medcon International, Menarini, Medtronic, MSD, Pfizer, Recor, Sanofi-Aventis, Stentys, The Medicines Company, TIMI Study Group, Universitat Basel, WebMD, and Zoll Medical.

E. Swahn reports receiving lecture fees from AstraZeneca.

20170425

### Author's contribution

E. Swahn is responsible for the conception and design of the gender substudy of the ATLANTIC trial. D. Venetsanos is responsible for analyses and interpretation of the data and drafted the manuscript. S. Sederholm Lawesson, J. Alfredsson, M. Janzon, A. Cequier, M. Chettibi, S.G. Goodman, A.W. van't Hof and G. Montalescot have critically revised the manuscript and added important intellectual content.

All authors have participated in the work and have read and approved the manuscript.

For peer review only

20170425

## References

1. Bairey Merz CN, Shaw LJ, Reis SE, Bittner V, Kelsey SF, Olson M, et al. Insights from the NHLBI-Sponsored Women's Ischemia Syndrome Evaluation (WISE) Study: Part II: gender differences in presentation, diagnosis, and outcome with regard to gender-based pathophysiology of atherosclerosis and macrovascular and microvascular coronary disease. *Journal of the American College of Cardiology*. 2006 Feb 7;47(3 Suppl):S21-9. PubMed PMID: 16458167.
2. Mehta RH, Stebbins AS, Lopes RD, Califf RM, Pieper KS, Armstrong PW, et al. Comparison of incidence of bleeding and mortality of men versus women with ST-elevation myocardial infarction treated with fibrinolysis. *The American journal of cardiology*. 2012 Feb 1;109(3):320-6. PubMed PMID: 22078221.
3. Kyto V, Sipila J, Rautava P. Gender and in-hospital mortality of ST-segment elevation myocardial infarction (from a multihospital nationwide registry study of 31,689 patients). *The American journal of cardiology*. 2015 Feb 1;115(3):303-6. PubMed PMID: 25488357.
4. Jakobsen L, Niemann T, Thorsgaard N, Nielsen TT, Thuesen L, Lassen JF, et al. Sex- and age-related differences in clinical outcome after primary percutaneous coronary intervention. *EuroIntervention : journal of EuroPCR in collaboration with the Working Group on Interventional Cardiology of the European Society of Cardiology*. 2012 Dec 20;8(8):904-11. PubMed PMID: 23253544.
5. Kang SH, Suh JW, Yoon CH, Cho MC, Kim YJ, Chae SC, et al. Sex differences in management and mortality of patients with ST-elevation myocardial infarction (from the Korean Acute Myocardial Infarction National Registry). *The American journal of cardiology*. 2012 Mar 15;109(6):787-93. PubMed PMID: 22196789.
6. Lawesson SS, Alfredsson J, Fredrikson M, Swahn E. A gender perspective on short- and long term mortality in ST-elevation myocardial infarction--a report from the SWEDEHEART register. *International journal of cardiology*. 2013 Sep 30;168(2):1041-7. PubMed PMID: 23168004.
7. de Boer SP, Roos-Hesselink JW, van Leeuwen MA, Lenzen MJ, van Geuns RJ, Regar E, et al. Excess mortality in women compared to men after PCI in STEMI: an analysis of 11,931 patients during 2000-2009. *International journal of cardiology*. 2014 Sep 20;176(2):456-63. PubMed PMID: 25127966.
8. Leurent G, Garlantezec R, Auffret V, Hacot JP, Coudert I, Filippi E, et al. Gender differences in presentation, management and inhospital outcome in patients with ST-segment elevation myocardial infarction: data from 5000 patients included in the ORBI prospective French regional registry. *Archives of cardiovascular diseases*. 2014 May;107(5):291-8. PubMed PMID: 24910083.
9. Lawesson SS, Alfredsson J, Fredrikson M, Swahn E. Time trends in STEMI--improved treatment and outcome but still a gender gap: a prospective observational cohort study from the SWEDEHEART register. *BMJ open*. 2012;2(2):e000726. PubMed PMID: 22457480. Pubmed Central PMCID: 3323814.
10. Pilgrim T, Heg D, Tal K, Erne P, Radovanovic D, Windecker S, et al. Age- and Gender-related Disparities in Primary Percutaneous Coronary Interventions for Acute ST-segment elevation Myocardial Infarction. *PloS one*. 2015;10(9):e0137047. PubMed PMID: 26352574. Pubmed Central PMCID: 4564139.
11. Lansky AJ, Pietras C, Costa RA, Tsuchiya Y, Brodie BR, Cox DA, et al. Gender differences in outcomes after primary angioplasty versus primary stenting with and without abciximab for acute myocardial infarction: results of the Controlled Abciximab and Device Investigation to Lower Late Angioplasty Complications (CADILLAC) trial. *Circulation*. 2005 Apr 5;111(13):1611-8. PubMed PMID: 15811868.
12. Motovska Z, Widimsky P, Aschermann M, Investigators PSG. The impact of gender on outcomes of patients with ST elevation myocardial infarction transported for percutaneous coronary intervention: analysis of the PRAGUE-1 and 2 studies. *Heart*. 2008 Mar;94(3):e5. PubMed PMID: 17693459.

20170425

- 1  
2  
3 13. Montalescot G, van 't Hof AW, Lapostolle F, Silvain J, Lassen JF, Bolognese L, et al. Prehospital ticagrelor in ST-segment elevation myocardial infarction. *The New England journal of medicine*. 2014 Sep 11;371(11):1016-27. PubMed PMID: 25175921.
- 4  
5  
6 14. Montalescot G, Lassen JF, Hamm CW, Lapostolle F, Silvain J, ten Berg JM, et al. Ambulance or in-catheterization laboratory administration of ticagrelor for primary percutaneous coronary intervention for ST-segment elevation myocardial infarction: rationale and design of the randomized, double-blind Administration of Ticagrelor in the cath Lab or in the Ambulance for New ST elevation myocardial Infarction to open the Coronary artery (ATLANTIC) study. *American heart journal*. 2013 Apr;165(4):515-22. PubMed PMID: 23537967.
- 7  
8  
9  
10  
11  
12 15. Wijnbergen I, Tijssen J, van 't Veer M, Michels R, Pijls NH. Gender differences in long-term outcome after primary percutaneous intervention for ST-segment elevation myocardial infarction. *Catheterization and cardiovascular interventions : official journal of the Society for Cardiac Angiography & Interventions*. 2013 Sep 1;82(3):379-84. PubMed PMID: 23553888.
- 13  
14  
15  
16 16. Champney KP, Frederick PD, Bueno H, Parashar S, Foody J, Merz CN, et al. The joint contribution of sex, age and type of myocardial infarction on hospital mortality following acute myocardial infarction. *Heart*. 2009 Jun;95(11):895-9. PubMed PMID: 19147625. Pubmed Central PMCID: 3065924.
- 17  
18  
19  
20  
21 17. Jneid H, Fonarow GC, Cannon CP, Hernandez AF, Palacios IF, Marea AO, et al. Sex differences in medical care and early death after acute myocardial infarction. *Circulation*. 2008 Dec 16;118(25):2803-10. PubMed PMID: 19064680.
- 22  
23  
24  
25 18. Jackson EA, Moscucci M, Smith DE, Share D, Dixon S, Greenbaum A, et al. The association of sex with outcomes among patients undergoing primary percutaneous coronary intervention for ST elevation myocardial infarction in the contemporary era: Insights from the Blue Cross Blue Shield of Michigan Cardiovascular Consortium (BMC2). *American heart journal*. 2011 Jan;161(1):106-12 e1. PubMed PMID: 21167341.
- 26  
27  
28  
29  
30 19. Suessenbacher A, Doerler J, Alber H, Aichinger J, Altenberger J, Benzer W, et al. Gender-related outcome following percutaneous coronary intervention for ST-elevation myocardial infarction: data from the Austrian acute PCI registry. *EuroIntervention : journal of EuroPCR in collaboration with the Working Group on Interventional Cardiology of the European Society of Cardiology*. 2008 Aug;4(2):271-6. PubMed PMID: 19110794.
- 31  
32  
33  
34  
35 20. Husted S, James SK, Bach RG, Becker RC, Budaj A, Heras M, et al. The efficacy of ticagrelor is maintained in women with acute coronary syndromes participating in the prospective, randomized, PLATElet inhibition and patient Outcomes (PLATO) trial. *European heart journal*. 2014 Jun 14;35(23):1541-50. PubMed PMID: 24682844. Pubmed Central PMCID: 4057642.
- 36  
37  
38  
39  
40 21. De Luca G, Gibson CM, Gyongyosi M, Zeymer U, Dudek D, Arntz HR, et al. Gender-related differences in outcome after ST-segment elevation myocardial infarction treated by primary angioplasty and glycoprotein IIb/IIIa inhibitors: insights from the EGYPT cooperation. *Journal of thrombosis and thrombolysis*. 2010 Oct;30(3):342-6. PubMed PMID: 20213259.
- 41  
42  
43  
44  
45 22. Benamer H, Tafflet M, Bataille S, Escolano S, Livarek B, Fourchard V, et al. Female gender is an independent predictor of in-hospital mortality after STEMI in the era of primary PCI: insights from the greater Paris area PCI Registry. *EuroIntervention : journal of EuroPCR in collaboration with the Working Group on Interventional Cardiology of the European Society of Cardiology*. 2011 Apr;6(9):1073-9. PubMed PMID: 21518679.
- 46  
47  
48  
49  
50 23. Pancholy SB, Shantha GP, Patel T, Cheskin LJ. Sex differences in short-term and long-term all-cause mortality among patients with ST-segment elevation myocardial infarction treated by primary percutaneous intervention: a meta-analysis. *JAMA internal medicine*. 2014 Nov;174(11):1822-30. PubMed PMID: 25265319.
- 51  
52  
53  
54 24. Peterson ED, Lansky AJ, Kramer J, Anstrom K, Lanzilotta MJ, National Cardiovascular Network Clinical I. Effect of gender on the outcomes of contemporary percutaneous coronary intervention. *The American journal of cardiology*. 2001 Aug 15;88(4):359-64. PubMed PMID: 11545754.
- 55  
56  
57  
58  
59  
60



20170425

- 1  
2  
3 25. Sederholm Lawesson S, Todt T, Alfredsson J, Janzon M, Stenstrand U, Swahn E.  
4 Gender difference in prevalence and prognostic impact of renal insufficiency in patients with ST-  
5 elevation myocardial infarction treated with primary percutaneous coronary intervention. *Heart*.  
6 2011 Feb;97(4):308-14. PubMed PMID: 21212134.
- 7 26. Berger JS, Elliott L, Gallup D, Roe M, Granger CB, Armstrong PW, et al. Sex differences  
8 in mortality following acute coronary syndromes. *JAMA : the journal of the American Medical*  
9 *Association*. 2009 Aug 26;302(8):874-82. PubMed PMID: 19706861. Pubmed Central PMCID:  
10 2778841.
- 11 27. Steg PG, Huber K, Andreotti F, Arnesen H, Atar D, Badimon L, et al. Bleeding in acute  
12 coronary syndromes and percutaneous coronary interventions: position paper by the Working  
13 Group on Thrombosis of the European Society of Cardiology. *European heart journal*. 2011  
14 Aug;32(15):1854-64. PubMed PMID: 21715717.
- 15 28. Mehran R, Pocock SJ, Nikolsky E, Clayton T, Dangas GD, Kirtane AJ, et al. A risk score to  
16 predict bleeding in patients with acute coronary syndromes. *Journal of the American College of*  
17 *Cardiology*. 2010 Jun 8;55(23):2556-66. PubMed PMID: 20513595.
- 18 29. Becker RC, Bassand JP, Budaj A, Wojdyla DM, James SK, Cornel JH, et al. Bleeding  
19 complications with the P2Y12 receptor antagonists clopidogrel and ticagrelor in the PLATElet  
20 inhibition and patient Outcomes (PLATO) trial. *European heart journal*. 2011 Dec;32(23):2933-44.  
21 PubMed PMID: 22090660.
- 22 30. Mathews R, Peterson ED, Chen AY, Wang TY, Chin CT, Fonarow GC, et al. In-hospital  
23 major bleeding during ST-elevation and non-ST-elevation myocardial infarction care: derivation and  
24 validation of a model from the ACTION Registry(R)-GWTG. *The American journal of cardiology*. 2011  
25 Apr 15;107(8):1136-43. PubMed PMID: 21324428.
- 26 31. Manoukian SV, Feit F, Mehran R, Voeltz MD, Ebrahimi R, Hamon M, et al. Impact of  
27 major bleeding on 30-day mortality and clinical outcomes in patients with acute coronary  
28 syndromes: an analysis from the ACUITY Trial. *Journal of the American College of Cardiology*. 2007  
29 Mar 27;49(12):1362-8. PubMed PMID: 17394970.
- 30 32. Ahmed B, Piper WD, Malenka D, VerLee P, Robb J, Ryan T, et al. Significantly improved  
31 vascular complications among women undergoing percutaneous coronary intervention: a report  
32 from the Northern New England Percutaneous Coronary Intervention Registry. *Circulation*  
33 *Cardiovascular interventions*. 2009 Oct;2(5):423-9. PubMed PMID: 20031752.
- 34 33. Cho L, Topol EJ, Balog C, Foody JM, Booth JE, Cabot C, et al. Clinical benefit of  
35 glycoprotein IIb/IIIa blockade with Abciximab is independent of gender: pooled analysis from EPIC,  
36 EPILOG and EPISTENT trials. Evaluation of 7E3 for the Prevention of Ischemic Complications.  
37 Evaluation in Percutaneous Transluminal Coronary Angioplasty to Improve Long-Term Outcome with  
38 Abciximab GP IIb/IIIa blockade. Evaluation of Platelet IIb/IIIa Inhibitor for Stent. *Journal of the*  
39 *American College of Cardiology*. 2000 Aug;36(2):381-6. PubMed PMID: 10933346.
- 40 34. Vlaar PJ, Svilaas T, van der Horst IC, Diercks GF, Fokkema ML, de Smet BJ, et al.  
41 Cardiac death and reinfarction after 1 year in the Thrombus Aspiration during Percutaneous  
42 coronary intervention in Acute myocardial infarction Study (TAPAS): a 1-year follow-up study.  
43 *Lancet*. 2008 Jun 7;371(9628):1915-20. PubMed PMID: 18539223.
- 44 35. De Luca G, Suryapranata H, Ottervanger JP, Antman EM. Time delay to treatment and  
45 mortality in primary angioplasty for acute myocardial infarction: every minute of delay counts.  
46 *Circulation*. 2004 Mar 16;109(10):1223-5. PubMed PMID: 15007008.
- 47 36. Sadowski M, Gasior M, Gierlotka M, Janion M, Polonski L. Gender-related differences  
48 in mortality after ST-segment elevation myocardial infarction: a large multicentre national registry.  
49 *EuroIntervention : journal of EuroPCR in collaboration with the Working Group on Interventional*  
50 *Cardiology of the European Society of Cardiology*. 2011 Apr;6(9):1068-72. PubMed PMID: 21518678.
- 51 37. Otten AM, Maas AH, Ottervanger JP, Kloosterman A, van 't Hof AW, Dambrink JH, et  
52 al. Is the difference in outcome between men and women treated by primary percutaneous  
53 coronary intervention age dependent? Gender difference in STEMI stratified on age. *European heart*  
54 *journal*. 2011 Jun 16;32(12):1403-10. PubMed PMID: 21644444.
- 55  
56  
57  
58  
59  
60



20170425

1  
2  
3 journal Acute cardiovascular care. 2013 Dec;2(4):334-41. PubMed PMID: 24338292. Pubmed Central  
4 PMCID: 3821825.

5 38. Wessler JD, Stant J, Duru S, Rabbani L, Kirtane AJ. Updates to the ACCF/AHA and ESC  
6 STEMI and NSTEMI guidelines: putting guidelines into clinical practice. The American journal of  
7 cardiology. 2015 Mar 14;115(5 Suppl):23A-8A. PubMed PMID: 25728971.  
8  
9  
10

## 11 **Figure legends**

12  
13  
14 Figure 1. Cumulative Kaplan-Meier estimates of the incidence of the composite endpoint of  
15 death, MI, stroke, urgent revascularisation or definite acute stent thrombosis and all-cause  
16 mortality at 30 days by gender.

17  
18 Figure 2. Association between gender and clinical efficacy and safety outcomes independent of  
19 randomised treatment.

20  
21 Figure 3. Association between gender and primary and secondary outcomes, independent of  
22 randomised treatment.

23  
24 Figure 4. Cumulative Kaplan-Meier estimates of the incidence of the TIMI major bleeding and  
25 BARC type 3-5 bleeding at 30 days by gender.  
26  
27  
28  
29  
30  
31  
32  
33  
34  
35  
36  
37  
38  
39  
40  
41  
42  
43  
44  
45  
46  
47  
48  
49  
50  
51  
52  
53  
54  
55  
56  
57  
58  
59  
60

20170425

**Table 1.** Baseline, clinical and periprocedural characteristics according to gender.

| Characteristics                                                        | Women (n=369)    | Men (n=1493)     | P- value |
|------------------------------------------------------------------------|------------------|------------------|----------|
| Age, years; mean (SD)                                                  | 69 (13.0)        | 59 (11)          | <0.01    |
| Age ≥75 years                                                          | 153 (41.5)       | 151 (10.1)       | <0.01    |
| BMI, kg/m <sup>2</sup> ; median (IQR)                                  | 25.6 (22.5-29.1) | 26.5 (24.3-29.4) | <0.01    |
| Prior history                                                          |                  |                  |          |
| Diabetes mellitus                                                      | 48 (13.0)        | 205 (13.7)       | 0.72     |
| Hypertension                                                           | 190 (51.5)       | 605 (40.5)       | <0.01    |
| Dyslipidemia                                                           | 117 (31.7)       | 536 (35.9)       | 0.13     |
| Angina                                                                 | 36 (9.8)         | 157 (10.5)       | 0.67     |
| Prior myocardial infarction                                            | 24 (6.5)         | 135 (9.0)        | 0.67     |
| Prior PCI                                                              | 16 (4.3)         | 124 (8.3)        | <0.01    |
| Prior CABG                                                             | 1 (0.3)          | 11 (0.7)         | 0.32     |
| Prior non-haemorrhagic stroke                                          | 8 (2.2)          | 10 (0.7)         | <0.01    |
| Chronic obstructive pulmonary disease                                  | 22 (6.0)         | 54 (3.6)         | 0.04     |
| Gastrointestinal bleeding                                              | 1 (0.3)          | 16 (1.1)         | 0.15     |
| Chronic renal disease                                                  | 7 (1.9)          | 27 (1.8)         | 0.91     |
| Index event information                                                |                  |                  |          |
| First medical contact in ambulance                                     | 280 (75.9)       | 1132 (75.8)      | 0.24     |
| Minutes from symptom onset to pre-hospital ECG, median (IQR)           | 88 (49-169)      | 70 (41-129)      | <0.01    |
| Minutes from prehospital ECG to PCI, median (IQR)                      | 83 (68-101)      | 80 (66-96)       | 0.03     |
| Minutes from pre-PCI angiography to post-PCI angiography, median (IQR) | 36 (24-52)       | 32 (23-45)       | 0.03     |
| Received first loading dose                                            | 369 (100)        | 1488 (99.7)      | 0.27     |
| Risk level at admission                                                |                  |                  |          |
| Killip class                                                           |                  |                  |          |
| I                                                                      | 332 (90.0)       | 1349 (90.4)      | 0.82     |
| IV                                                                     | 2 (0.5)          | 3 (0.2)          |          |
| TIMI risk score                                                        |                  |                  |          |
| 0-2                                                                    | 119 (32.2)       | 1006 (67.4)      | 0.01     |
| 3-6                                                                    | 231 (62.6)       | 471 (31.5)       |          |
| >6                                                                     | 19 (5.1)         | 16 (1.1)         |          |
| Culprit vessel                                                         |                  |                  |          |
| Left main artery                                                       | 4 (1.1)          | 18 (1.2)         | 0.63     |

20170425

|                                                        |            |             |       |
|--------------------------------------------------------|------------|-------------|-------|
| Left anterior descending artery                        | 141 (38.8) | 571 (39.0)  |       |
| Right coronary artery                                  | 150 (41.3) | 590 (40.3)  |       |
| Left circumflex                                        | 39 (10.7)  | 196 (13.4)  |       |
| No culprit vessel identified                           | 28 (7.7)   | 85 (5.8)    |       |
| Normal coronary angiography                            | 27 (7.4)   | 76 (5.2)    | 0.1   |
| Procedures for index event                             |            |             |       |
| Femoral access                                         | 144 (39.7) | 445 (30.4)  | <0.01 |
| Thromboaspiration                                      | 160 (43.4) | 781 (52.3)  | <0.01 |
| PCI                                                    | 309 (83.7) | 1321 (88.5) | 0.01  |
| With any stent                                         | 288 (78.0) | 1248 (83.6) | 0.01  |
| With DES                                               | 185 (50.1) | 761 (51.0)  | 0.77  |
| Coronary artery bypass grafting                        | 4 (1.1)    | 21 (1.4)    | 0.63  |
| No revascularisation                                   | 56 (15.2)  | 151 (10.1)  | <0.01 |
| Any glycoprotein IIb/IIIa inhibitor use                | 115 (31.2) | 598 (40.1)  | <0.01 |
| Glycoprotein IIb/IIIa inhibitor use before angiography | 14 (3.8)   | 116 (7.8)   | <0.01 |
| Intravenous anticoagulant prior to pre-PCI angiography | 231 (62.6) | 1027 (68.8) | 0.02  |
| Intravenous anticoagulant during hospitalisation †     | 310 (84.0) | 1332 (89.2) | <0.01 |
| Heparin only                                           | 135 (36.6) | 584 (39.1)  | 0.02  |
| Bivalirudin only                                       | 29 (7.9)   | 65 (4.4)    | 0.02  |

Variables presented as numbers (percentages) unless otherwise indicated.

BMI, body mass index; CABG, coronary artery bypass grafting; DES, drug-eluting stent; IQR, interquartile range (25<sup>th</sup>–75<sup>th</sup> percentile); PCI, percutaneous coronary intervention; SD, standard deviation; TIMI, Thrombolysis In Myocardial Infarction.

† Includes all IV medications given on the date of the qualifying ECG and /or index PCI

20170425

**Table 2** Association between gender and clinical outcomes independent of randomised treatment

| Outcomes                                                                              | Female (n=369)                   | Male (n=1489)                    | Crude hazard ratio<br>(95%CI)<br>(n included=1858) | Adjusted hazard<br>ratio (95%CI)*<br>(n included=1613) | P-value * |
|---------------------------------------------------------------------------------------|----------------------------------|----------------------------------|----------------------------------------------------|--------------------------------------------------------|-----------|
|                                                                                       | Patients with<br>endpoint, n (%) | Patients with<br>endpoint, n (%) |                                                    |                                                        |           |
| Mortality and cardiovascular outcomes                                                 |                                  |                                  |                                                    |                                                        |           |
| Composite of death/MI/stroke/urgent revascularisation/definite acute stent thrombosis | 25 (6.8)                         | 58 (3.9)                         | 1.79 (1.12-2.86)                                   | 1.32 (0.77-2.27)                                       | 0.32      |
| Composite of death/MI/urgent revascularisation                                        | 23 (6.2)                         | 50 (3.4)                         | 1.91 (1.17-3.13)                                   | 1.33 (0.75-2.36)                                       | 0.32      |
| All-cause mortality                                                                   | 21 (5.7)                         | 28 (1.9)                         | 3.13 (1.78-5.51)                                   | 2.08 (1.03-4.20)                                       | 0.04      |
| Myocardial infarction                                                                 | 3 (0.8)                          | 14 (0.9)                         | 0.90 (0.26-3.13)                                   | 0.82 (0.23-2.85)                                       | 0.76      |
| Stroke                                                                                | 3 (0.8)                          | 3 (0.2)                          | 4.18 (0.84-20.70)                                  | 4.14 (0.84-20.51)                                      | 0.08      |
| Urgent revascularisation                                                              | 2 (0.5)                          | 11 (0.7)                         | 0.75 (0.17-3.38)                                   | 0.69 (0.15-3.11)                                       | 0.63      |
| Definite acute stent thrombosis                                                       | 3 (0.8)                          | 10 (0.7)                         | 1.23 (0.34-4.49)                                   | 1.29 (0.35-4.76)                                       | 0.70      |
| Acute stent thrombosis (definite or probable)                                         | 11 (3.0)                         | 30 (2.0)                         | 1.53 (0.77-3.05)                                   | 0.88 (0.39-1.98)                                       | 0.76      |
| Safety outcomes                                                                       |                                  |                                  |                                                    |                                                        |           |
| PLATO major bleeding **                                                               | 17 (4.6)                         | 33 (2.2)                         | 2.15 (1.20-3.85)                                   | 1.45 (0.73-2.86)                                       | 0.29      |
| TIMI major bleeding **                                                                | 10 (2.7)                         | 14 (0.9)                         | 2.95 (1.31-6.65)                                   | 1.28 (0.47-3.48)                                       | 0.63      |

20170425

|                                           |          |          |                  |                  |      |
|-------------------------------------------|----------|----------|------------------|------------------|------|
| TIMI major or minor bleeding**            | 18 (4.9) | 54 (3.6) | 1.38 (0.81-2.35) | 0.94 (0.51-1.74) | 0.85 |
| BARC type 3-5 (major) bleeding**          | 16 (4.3) | 31 (2.1) | 2.15 (1.18-3.93) | 1.45 (0.72-2.91) | 0.30 |
| BARC type 2-5 (major or minor) bleeding** | 20 (5.4) | 56 (3.8) | 1.48 (0.89-2.47) | 1.03 (0.57-1.84) | 0.93 |

\*Hazard ratio (for female versus male) and p-value calculated from logistic regression model including gender, age, weight, prior myocardial infarction, prior percutaneous coronary intervention, diabetes, hypertension, non-hemorrhagic stroke, gastrointestinal bleeding, time from symptom onset to pre-hospital ECG, admission Killip class, baseline hemoglobin, estimated glomerular filtration rate, access site, glycoprotein IIb/IIIa inhibitor, bivalirudin or unfractionated heparin use during index procedure, revascularization and location of myocardial infarction

\*\*Non-CABG related bleeding occurring up to the date of the last study visit (to the maximum of 32 days) are included in the table

BARC, Bleeding Academic Research Consortium; MI, myocardial infarction; PLATO, Study of Platelet Inhibition and Patient Outcomes; TIMI, Thrombolysis in Myocardial Infarction

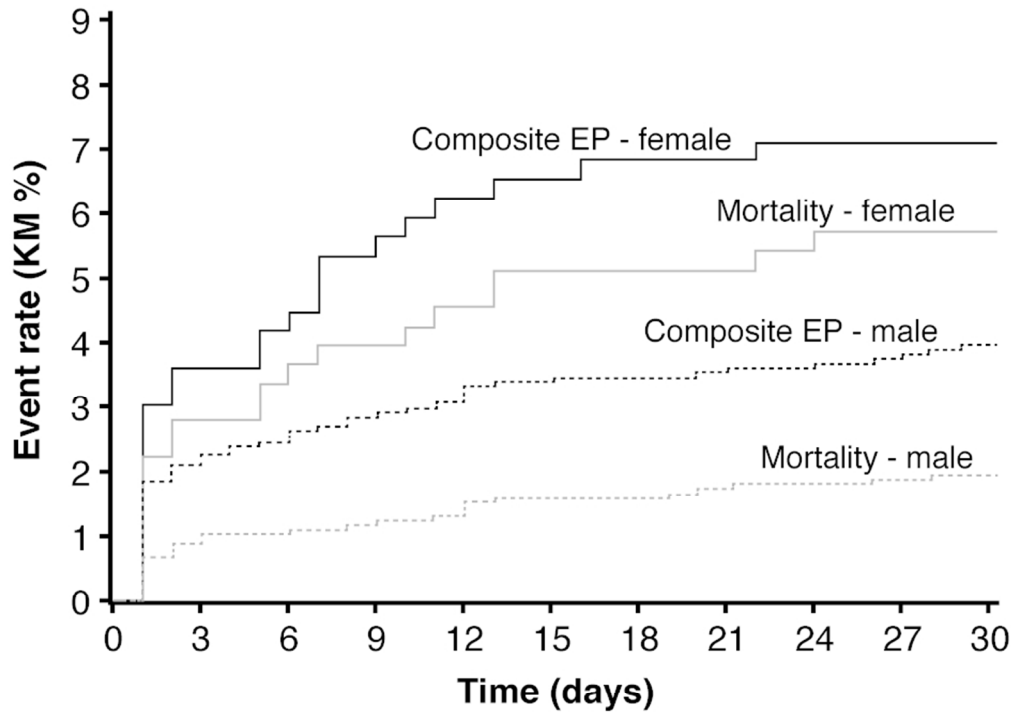

| <b>Composite endpoint</b> | <b>All-cause mortality</b> |
|---------------------------|----------------------------|
| Female 25/369 (6.8%)      | Female 21/369 (5.7%)       |
| Male 58/1489 (3.9%)       | Male 28/1489 (1.9%)        |

Caption : Figure 1. Cumulative Kaplan-Meier estimates of the incidence of the composite endpoint of death, MI, stroke, urgent revascularisation or definite acute stent thrombosis and all-cause mortality at 30 days by gender.

79x70mm (300 x 300 DPI)

only

1  
2  
3  
4  
5  
6  
7  
8  
9  
10  
11  
12  
13  
14  
15  
16  
17  
18  
19  
20  
21  
22  
23  
24  
25  
26  
27  
28  
29  
30  
31  
32  
33  
34  
35  
36  
37  
38  
39  
40  
41  
42  
43  
44  
45  
46  
47  
48  
49  
50  
51  
52  
53  
54  
55  
56  
57  
58  
59  
60

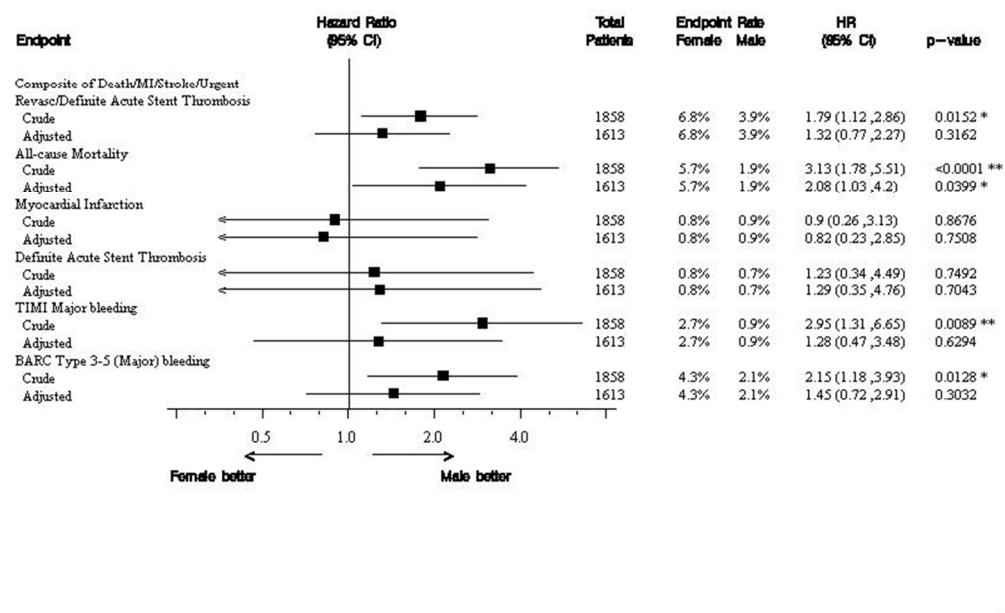

211x158mm (96 x 96 DPI)

ew only

1  
2  
3  
4  
5  
6  
7  
8  
9  
10  
11  
12  
13  
14  
15  
16  
17  
18  
19  
20  
21  
22  
23  
24  
25  
26  
27  
28  
29  
30  
31  
32  
33  
34  
35  
36  
37  
38  
39  
40  
41  
42  
43  
44  
45  
46  
47  
48  
49  
50  
51  
52  
53  
54  
55  
56  
57  
58  
59  
60

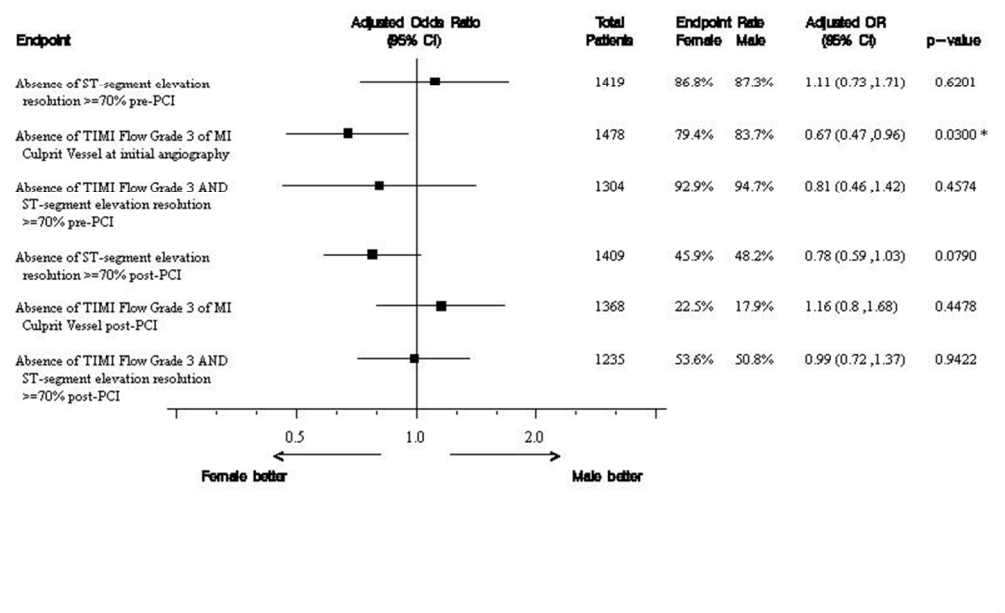

211x158mm (96 x 96 DPI)

ew only



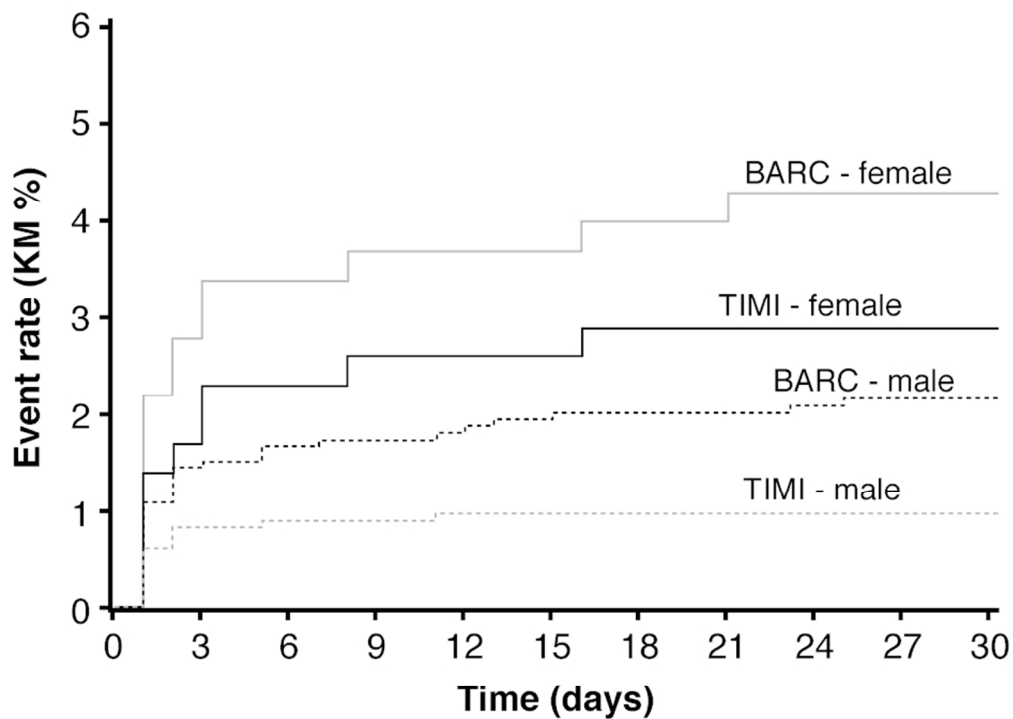

|                         |                            |
|-------------------------|----------------------------|
| <b>TIMI major bleed</b> | <b>BARC type 3–5 bleed</b> |
| Female 10/369 (2.7%)    | Female 16/369 (4.3%)       |
| Male 14/1489 (0.9%)     | Male 31/1489 (2.1%)        |

Caption : Figure 4. Cumulative Kaplan-Meier estimates of the incidence of the TIMI major bleeding and BARC type 3-5 bleeding at 30 days by gender.

79x69mm (300 x 300 DPI)

only

**Supplementary table 1** Association between gender and efficacy of randomised treatment – clinical outcomes

| Outcomes                                                                   | Gender | Pre-hospital ticagrelor (n=906) |                               | In-hospital ticagrelor (n=952) |                               | Model , n | Adjusted hazard ratio ≠ (95% CI) | P-value (interaction) ≠ |
|----------------------------------------------------------------------------|--------|---------------------------------|-------------------------------|--------------------------------|-------------------------------|-----------|----------------------------------|-------------------------|
|                                                                            |        | N                               | Patients with endpoint, n (%) | N                              | Patients with endpoint, n (%) |           |                                  |                         |
| Composite of Death/MI/Stroke/Urgent Revasc/Definite Acute Stent Thrombosis | Female | 173                             | 13 (7.5)                      | 196                            | 12 (6.1)                      | 1613      | 0.98 (0.42-2.27)                 | 0.87                    |
|                                                                            | Male   | 733                             | 28 (3.8)                      | 756                            | 30 (4.0)                      |           | 0.90 (0.51-1.59)                 |                         |
| Composite of Death/MI/Urgent Revasc                                        | Female | 173                             | 13 (7.5)                      | 196                            | 10 (5.1)                      | 1613      | 1.32 (0.55-3.20)                 | 0.55                    |
|                                                                            | Male   | 733                             | 26 (3.5)                      | 756                            | 24 (3.2)                      |           | 0.95 (0.52-1.76)                 |                         |
| All-cause mortality                                                        | Female | 173                             | 13 (7.5)                      | 196                            | 8 (4.1)                       | 1613      | 1.59 (0.61-4.12)                 | 0.93                    |
|                                                                            | Male   | 733                             | 17 (2.3)                      | 756                            | 11 (1.5)                      |           | 1.50 (0.60-3.74)                 |                         |
| Myocardial infarction                                                      | Female | 173                             | 1 (0.6)                       | 196                            | 2 (1.0)                       | 1613      | 0.44 (0.04-4.95)                 | 0.72                    |
|                                                                            | Male   | 733                             | 6 (0.8)                       | 756                            | 8 (1.1)                       |           | 0.72 (0.25-2.09)                 |                         |
| Stroke                                                                     | Female | 173                             | 1 (0.6)                       | 196                            | 2 (1.0)                       | 1613      | 0.54 (0.05-5.90)                 | 0.99                    |
|                                                                            | Male   | 733                             | 3 (0.4)                       | 756                            | 0 (0.0)                       |           | Nt estimated                     |                         |
| Urgent revascularization                                                   | Female | 173                             | 1 (0.6)                       | 196                            | 1 (0.5)                       | 1613      | 0.86 (0.05-14.07)                | 0.76                    |
|                                                                            | Male   | 733                             | 4 (0.5)                       | 756                            | 7 (0.9)                       |           | 0.54 (0.15-1.87)                 |                         |
| Definite Acute Stent Thrombosis                                            | Female | 173                             | 1 (0.6)                       | 196                            | 2 (1.0)                       | 1613      | 0.37 (0.03-4.27)                 | 0.49                    |
|                                                                            | Male   | 733                             | 1 (0.1)                       | 756                            | 9 (1.2)                       |           | 0.12 (0.01-1.02)                 |                         |
| Acute Stent Thrombosis (definite or probable)                              | Female | 173                             | 7 (4.0)                       | 196                            | 4 (2.0)                       | 1613      | 1.31 (0.37-4.69)                 | 0.52                    |
|                                                                            | Male   | 733                             | 14 (1.9)                      | 756                            | 16 (2.1)                      |           | 0.80 (0.35-1.80)                 |                         |

1  
2  
3  
4  
5  
6  
7  
8  
9  
10  
11  
12  
13  
14  
15  
16  
17  
18  
19  
20  
21  
22  
23  
24  
25  
26  
27  
28  
29  
30  
31  
32  
33  
34  
35  
36  
37  
38  
39  
40  
41  
42  
43  
44  
45  
46  
47  
48  
49  
50  
51  
52  
53  
54  
55  
56  
57  
58  
59  
60

≠ Adjusted hazard (for female versus male) and p-values for interaction was calculated from Cox proportional hazard model including gender, age, weight, prior myocardial infarction, prior percutaneous coronary intervention, diabetes, hypertension, non-hemorrhagic stroke, gastrointestinal bleeding, time from symptom onset to pre-hospital ECG, admission Killip class, baseline hemoglobin, estimated glomerular filtration rate, glycoprotein IIb/IIIa inhibitor use during index procedure, location of myocardial infarction

For peer review only

**Supplementary table 2** Association between gender and efficacy of randomised treatment – primary and secondary outcomes

| Outcomes                                                                                                   | Gender | Pre-hospital ticagrelor (n=906) |                               | In-hospital ticagrelor (n=952) |                               | Model N ≠ | Adjusted odds ratio ≠ (95% CI) | P-value (interaction) ≠ |
|------------------------------------------------------------------------------------------------------------|--------|---------------------------------|-------------------------------|--------------------------------|-------------------------------|-----------|--------------------------------|-------------------------|
|                                                                                                            |        | N                               | Patients with endpoint, n (%) | N                              | Patients with endpoint, n (%) |           |                                |                         |
| Absence of ST segment elevation resolution ≥ 70% pre-PCI                                                   | Female | 142                             | 122 (85.9)                    | 168                            | 147 (87.5)                    | 1419      | 0.75 (0.37-1.53)               | 0.71                    |
|                                                                                                            | Male   | 632                             | 550 (87.0)                    | 656                            | 575 (87.7)                    |           | 0.85 (0.59-1.23)               |                         |
| Absence of TIMI flow grade 3 in infarct related artery at initial angiography                              | Female | 155                             | 127 (81.9)                    | 175                            | 135 (77.1)                    | 1478      | 1.36 (0.76-2.41)               | 0.19                    |
|                                                                                                            | Male   | 669                             | 554 (82.8)                    | 681                            | 576 (84.6)                    |           | 0.88 (0.64-1.20)               |                         |
| Absence of ST segment resolution ≥ 70% AND absence of TIMI flow grade 3 in infarct related artery pre-PCI  | Female | 129                             | 120 (93.0)                    | 153                            | 142 (92.8)                    | 1304      | 1.07 (0.41-2.81)               | 0.84                    |
|                                                                                                            | Male   | 590                             | 557 (94.4)                    | 598                            | 568 (95.0)                    |           | 0.96 (0.57-1.62)               |                         |
| Absence of ST-segment resolution ≥70% after PCI                                                            | Female | 144                             | 61 (42.4)                     | 163                            | 80 (49.1)                     | 1409      | 0.76 (0.47-1.25)               | 0.51                    |
|                                                                                                            | Male   | 629                             | 291 (46.3)                    | 650                            | 326 (50.2)                    |           | 0.92 (0.72-1.17)               |                         |
| Absence of TIMI flow grade 3 in infarct related artery after PCI                                           | Female | 144                             | 30 (20.8)                     | 154                            | 37 (24.0)                     | 1368      | 0.93 (0.51-1.71)               | 0.98                    |
|                                                                                                            | Male   | 621                             | 107 (17.2)                    | 631                            | 117 (18.5)                    |           | 0.92 (0.68-1.26)               |                         |
| Absence of ST segment resolution ≥70% AND absence of TIMI flow grade 3 in infarct related artery after PCI | Female | 125                             | 60 (48.0)                     | 138                            | 81 (58.7)                     | 1235      | 0.64 (0.38-1.10)               | 0.13                    |
|                                                                                                            | Male   | 562                             | 282 (50.2)                    | 565                            | 290 (51.3)                    |           | 1.01 (0.78-1.32)               |                         |

1  
2  
3  
4  
5  
6  
7  
8  
9  
10  
11  
12  
13  
14  
15  
16  
17  
18  
19  
20  
21  
22  
23  
24  
25  
26  
27  
28  
29  
30  
31  
32  
33  
34  
35  
36  
37  
38  
39  
40  
41  
42  
43  
44  
45  
46  
47  
48  
49  
50  
51  
52  
53  
54  
55  
56  
57  
58  
59  
60

≠ Adjusted odds ratio (for female versus male) and p-values for interaction was calculated from logistic regression model including gender, age, weight, prior myocardial infarction, prior percutaneous coronary intervention, diabetes, hypertension, non-hemorrhagic stroke, gastrointestinal bleeding, time from symptom onset to pre-hospital ECG, admission Killip class, baseline hemoglobin, estimated glomerular filtration rate, glycoprotein IIb/IIIa inhibitor use during index procedure, location of myocardial infarction

For peer review only

**Supplementary table 3** Association between gender and safety of randomised treatment (safety outcomes)

| End point                               | Gender | Pre-hospital ticagrelor (n=906) |                               | In-hospital ticagrelor (n=952) |                               | Model N ≠ | Adjusted hazard ratio ≠ (95% CI) | P-value (interaction) ≠ |
|-----------------------------------------|--------|---------------------------------|-------------------------------|--------------------------------|-------------------------------|-----------|----------------------------------|-------------------------|
|                                         |        | N                               | Patients with endpoint, n (%) | N                              | Patients with endpoint, n (%) |           |                                  |                         |
| PLATO major bleeding                    | Female | 173                             | 6 (3.5)                       | 196                            | 11 (5.6)                      | 1613      | 0.61 (0.21-1.83)                 | 0.23                    |
|                                         | Male   | 733                             | 19 (2.6)                      | 756                            | 14 (1.9)                      |           | 1.39 (0.66-2.93)                 |                         |
| PLATO major and minr bleeding           | Female | 173                             | 7 (4.0)                       | 196                            | 13 (6.6)                      | 1613      | 0.59 (0.22-1.61)                 | 0.19                    |
|                                         | Male   | 733                             | 33 (4.5)                      | 756                            | 26 (3.4)                      |           | 1.27 (0.73-2.21)                 |                         |
| TIMI major bleeding                     | Female | 173                             | 3 (1.7)                       | 196                            | 7 (3.6)                       | 1613      | 0.60 (0.14-2.54)                 | 0.28                    |
|                                         | Male   | 733                             | 9 (1.2)                       | 756                            | 5 (0.7)                       |           | 1.62 (0.53-4.98)                 |                         |
| TIMI major and minr bleeding            | Female | 173                             | 6 (3.5)                       | 196                            | 12 (6.1)                      | 1613      | 0.55 (0.19-1.60)                 | 0.24                    |
|                                         | Male   | 733                             | 29 (4.0)                      | 756                            | 25 (3.3)                      |           | 1.14 (0.64-2.03)                 |                         |
| BARC type 3-5 (major) bleeding          | Female | 173                             | 6 (3.5)                       | 196                            | 10 (5.1)                      | 1613      | 0.69 (0.23-2.11)                 | 0.26                    |
|                                         | Male   | 733                             | 18 (2.5)                      | 756                            | 13 (1.7)                      |           | 1.51 (0.70-3.26)                 |                         |
| BARC type 2-5 (major and minr) bleeding | Female | 173                             | 7 (4.0)                       | 196                            | 13 (6.6)                      | 1613      | 0.59 (0.22-1.60)                 | 0.21                    |
|                                         | Male   | 733                             | 31 (4.2)                      | 756                            | 25 (3.3)                      |           | 1.23 (0.70-2.17)                 |                         |

1  
2  
3  
4  
5  
6  
7  
8  
9  
10  
11  
12  
13  
14  
15  
16  
17  
18  
19  
20  
21  
22  
23  
24  
25  
26  
27  
28  
29  
30  
31  
32  
33  
34  
35  
36  
37  
38  
39  
40  
41  
42  
43  
44  
45  
46  
47  
48  
49  
50  
51  
52  
53  
54  
55  
56  
57  
58  
59  
60

≠Adjusted hazard (for female versus male) and p-values for interaction was calculated from Cox proportional hazard model including gender, age, weight, prior myocardial infarction, prior percutaneous coronary intervention, diabetes, hypertension, non-hemorrhagic stroke, gastrointestinal bleeding, time from symptom onset to pre-hospital ECG, admission Killip class, baseline hemoglobin, estimated glomerular filtration rate, glycoprotein IIb/IIIa inhibitor use during index procedure, location of myocardial infarction

For peer review only

STROBE 2007 (v4) Statement—Checklist of items that should be included in reports of cohort studies

| Section/Topic             | Item # | Recommendation                                                                                                                                                                       | Reported on page # |
|---------------------------|--------|--------------------------------------------------------------------------------------------------------------------------------------------------------------------------------------|--------------------|
| Title and abstract        | 1      | (a) Indicate the study’s design with a commonly used term in the title or the abstract                                                                                               | 2                  |
|                           |        | (b) Provide in the abstract an informative and balanced summary of what was done and what was found                                                                                  | 2                  |
| <b>Introduction</b>       |        |                                                                                                                                                                                      |                    |
| Background/rationale      | 2      | Explain the scientific background and rationale for the investigation being reported                                                                                                 | 4                  |
| Objectives                | 3      | State specific objectives, including any prespecified hypotheses                                                                                                                     | 4                  |
| <b>Methods</b>            |        |                                                                                                                                                                                      |                    |
| Study design              | 4      | Present key elements of study design early in the paper                                                                                                                              | 4,5                |
| Setting                   | 5      | Describe the setting, locations, and relevant dates, including periods of recruitment, exposure, follow-up, and data collection                                                      | 4,5                |
| Participants              | 6      | (a) Give the eligibility criteria, and the sources and methods of selection of participants. Describe methods of follow-up                                                           | 4,5                |
|                           |        | (b) For matched studies, give matching criteria and number of exposed and unexposed                                                                                                  | NA                 |
| Variables                 | 7      | Clearly define all outcomes, exposures, predictors, potential confounders, and effect modifiers. Give diagnostic criteria, if applicable                                             | 5                  |
| Data sources/ measurement | 8*     | For each variable of interest, give sources of data and details of methods of assessment (measurement). Describe comparability of assessment methods if there is more than one group | 5                  |
| Bias                      | 9      | Describe any efforts to address potential sources of bias                                                                                                                            | 5,6                |
| Study size                | 10     | Explain how the study size was arrived at                                                                                                                                            | N/A                |
| Quantitative variables    | 11     | Explain how quantitative variables were handled in the analyses. If applicable, describe which groupings were chosen and why                                                         | 5,6                |
| Statistical methods       | 12     | (a) Describe all statistical methods, including those used to control for confounding                                                                                                | 5, 6               |
|                           |        | (b) Describe any methods used to examine subgroups and interactions                                                                                                                  | 5, 6               |
|                           |        | (c) Explain how missing data were addressed                                                                                                                                          | 6                  |
|                           |        | (d) If applicable, explain how loss to follow-up was addressed                                                                                                                       | N/A                |
|                           |        | (e) Describe any sensitivity analyses                                                                                                                                                | 6                  |
| <b>Results</b>            |        |                                                                                                                                                                                      |                    |

1  
2  
3  
4  
5  
6  
7  
8  
9  
10  
11  
12  
13  
14  
15  
16  
17  
18  
19  
20  
21  
22  
23  
24  
25  
26  
27  
28  
29  
30  
31  
32  
33  
34  
35  
36  
37  
38  
39  
40  
41  
42  
43  
44  
45  
46  
47  
48  
49



|                          |     |                                                                                                                                                                                                                                                                                                                                                                                                               |                          |
|--------------------------|-----|---------------------------------------------------------------------------------------------------------------------------------------------------------------------------------------------------------------------------------------------------------------------------------------------------------------------------------------------------------------------------------------------------------------|--------------------------|
| Participants             | 13* | (a) Report numbers of individuals at each stage of study—eg numbers potentially eligible, examined for eligibility, confirmed eligible, included in the study, completing follow-up, and analysed<br>(b) Give reasons for non-participation at each stage<br>(c) Consider use of a flow diagram                                                                                                               | 4<br><br>NA (SEE PAGE 4) |
| Descriptive data         | 14* | (a) Give characteristics of study participants (eg demographic, clinical, social) and information on exposures and potential confounders<br>(b) Indicate number of participants with missing data for each variable of interest<br>(c) Summarise follow-up time (eg, average and total amount)                                                                                                                | 7, 8, 9<br>6<br>NA       |
| Outcome data             | 15* | Report numbers of outcome events or summary measures over time                                                                                                                                                                                                                                                                                                                                                | 9, 10, 11, 12            |
| Main results             | 16  | (a) Give unadjusted estimates and, if applicable, confounder-adjusted estimates and their precision (eg, 95% confidence interval). Make clear which confounders were adjusted for and why they were included<br>(b) Report category boundaries when continuous variables were categorized<br>(c) If relevant, consider translating estimates of relative risk into absolute risk for a meaningful time period | 9, 10, 11, 12<br>yes     |
| Other analyses           | 17  | Report other analyses done—eg analyses of subgroups and interactions, and sensitivity analyses                                                                                                                                                                                                                                                                                                                | 10                       |
| <b>Discussion</b>        |     |                                                                                                                                                                                                                                                                                                                                                                                                               |                          |
| Key results              | 18  | Summarise key results with reference to study objectives                                                                                                                                                                                                                                                                                                                                                      | 13, 14                   |
| <b>Limitations</b>       |     |                                                                                                                                                                                                                                                                                                                                                                                                               |                          |
| Interpretation           | 20  | Give a cautious overall interpretation of results considering objectives, limitations, multiplicity of analyses, results from similar studies, and other relevant evidence                                                                                                                                                                                                                                    | 13, 14                   |
| Generalisability         | 21  | Discuss the generalisability (external validity) of the study results                                                                                                                                                                                                                                                                                                                                         | NA                       |
| <b>Other information</b> |     |                                                                                                                                                                                                                                                                                                                                                                                                               |                          |
| Funding                  | 22  | Give the source of funding and the role of the funders for the present study and, if applicable, for the original study on which the present article is based                                                                                                                                                                                                                                                 | 17                       |

\*Give information separately for cases and controls in case-control studies and, if applicable, for exposed and unexposed groups in cohort and cross-sectional studies.

**Note:** An Explanation and Elaboration article discusses each checklist item and gives methodological background and published examples of transparent reporting. The STROBE checklist is best used in conjunction with this article (freely available on the Web sites of PLoS Medicine at <http://www.plosmedicine.org/>, Annals of Internal Medicine at <http://www.annals.org/>, and Epidemiology at <http://www.epidem.com/>). Information on the STROBE Initiative is available at [www.strobe-statement.org](http://www.strobe-statement.org).

# BMJ Open

**Association between gender and short term outcome in ST elevation myocardial infarction patients participating in the international, prospective, randomised Administration of Ticagrelor in the cath Lab or in the Ambulance for New ST elevation myocardial Infarction to open the Coronary artery (ATLANTIC) trial: a prespecified analysis**

|                                 |                                                                                                                                                                                                                                                                                                                                                                                                                                                                                                                                                                                                                                                                                                                                                                                                                                                                                                                       |
|---------------------------------|-----------------------------------------------------------------------------------------------------------------------------------------------------------------------------------------------------------------------------------------------------------------------------------------------------------------------------------------------------------------------------------------------------------------------------------------------------------------------------------------------------------------------------------------------------------------------------------------------------------------------------------------------------------------------------------------------------------------------------------------------------------------------------------------------------------------------------------------------------------------------------------------------------------------------|
| Journal:                        | <i>BMJ Open</i>                                                                                                                                                                                                                                                                                                                                                                                                                                                                                                                                                                                                                                                                                                                                                                                                                                                                                                       |
| Manuscript ID                   | bmjopen-2016-015241.R3                                                                                                                                                                                                                                                                                                                                                                                                                                                                                                                                                                                                                                                                                                                                                                                                                                                                                                |
| Article Type:                   | Research                                                                                                                                                                                                                                                                                                                                                                                                                                                                                                                                                                                                                                                                                                                                                                                                                                                                                                              |
| Date Submitted by the Author:   | 29-May-2017                                                                                                                                                                                                                                                                                                                                                                                                                                                                                                                                                                                                                                                                                                                                                                                                                                                                                                           |
| Complete List of Authors:       | Venetsanos, Dimitrios; Department of Medical and Health Sciences, Cardiology<br>Sederholm Lawesson, Sofia; Department of Medical and Health Sciences, Division of Cardiovascular Medicine;<br>Alfredsson, Joakim; Department of Cardiology and Department of Medical and Health Sciences, Linköping University, Linköping, Sweden<br>Janzon, magnus; Linköping University, Department of Medical and Health Sciences, Division of Cardiology<br>Cequier, Angel<br>Chettibi, Mohamed; Centre Hospito-universitaire Frantz Fanon, Blida, Algeria<br>Goodman, Shaun; Canadian Heart Research Centre, Division of Cardiology, St Michael's Hospital, University of Toronto, Toronto<br>van 't Hof, Arnoud; Isala Klinieken, Cardiology<br>Montalescot, Gilles; UPMC Sorbonne Universités, ACTION Study Group, INSERM-UMRS 1166, Institut de Cardiologie, Pitié-Salpêtrière Hospital (AP-HP) – Paris, France<br>Swahn, Eva |
| <b>Primary Subject Heading</b>: | Cardiovascular medicine                                                                                                                                                                                                                                                                                                                                                                                                                                                                                                                                                                                                                                                                                                                                                                                                                                                                                               |
| Secondary Subject Heading:      | Medical management                                                                                                                                                                                                                                                                                                                                                                                                                                                                                                                                                                                                                                                                                                                                                                                                                                                                                                    |
| Keywords:                       | Myocardial infarction < CARDIOLOGY, STEMI, gender, ticagrelor, PCI                                                                                                                                                                                                                                                                                                                                                                                                                                                                                                                                                                                                                                                                                                                                                                                                                                                    |
|                                 |                                                                                                                                                                                                                                                                                                                                                                                                                                                                                                                                                                                                                                                                                                                                                                                                                                                                                                                       |

SCHOLARONE™  
Manuscripts

1  
2  
3  
4  
5 **Association between gender and short term outcome in ST elevation**  
6 **myocardial infarction patients participating in the international, prospective,**  
7 **randomised Administration of Ticagrelor in the cath Lab or in the Ambulance**  
8 **for New ST elevation myocardial Infarction to open the Coronary artery**  
9 **(ATLANTIC) trial: a prespecified analysis**  
10  
11  
12  
13  
14  
15  
16  
17  
18

19 D. Venetsanos<sup>1</sup>, S. Sederholm Lawesson<sup>1</sup>, J. Alfredsson<sup>1</sup>, M. Janzon<sup>1</sup>, A. Cequier<sup>2</sup>, M.  
20 Chettibi<sup>3</sup>, S.G. Goodman<sup>4</sup>, A.W. van 't Hof<sup>5</sup>, G. Montalescot<sup>6</sup>, E. Swahn<sup>1\*</sup>  
21  
22

23 <sup>1</sup>Department of Cardiology and Department of Medical and Health Sciences, Linköping  
24 University, Linköping, Sweden; <sup>2</sup>Heart Disease Institute, Hospital Universitario de Bellvitge,  
25 University of Barcelona, L'Hospitalet de Llobregat, Barcelona, Spain; <sup>3</sup>Centre Hospito-  
26 universitaire Frantz Fanon, Blida, Algeria; <sup>4</sup>Canadian Heart Research Centre, Division of  
27 Cardiology, St Michael's Hospital, University of Toronto, Toronto, Canada; <sup>5</sup>Department of  
28 Cardiology, Isala Clinics, Zwolle, Netherlands; <sup>6</sup>UPMC Sorbonne Universités, ACTION  
29 Study Group, INSERM-UMRS 1166, Institut de Cardiologie, Pitié-Salpêtrière Hospital (AP-  
30 HP) – Paris, France  
31  
32  
33  
34  
35  
36  
37  
38  
39  
40  
41  
42

43 **Keywords: myocardial infarction, STEMI, gender, primary PCI, ATLANTIC,**  
44 **ticagrelor**  
45  
46  
47  
48

49 **\*Corresponding author:** Dimitrios Venetsanos, Department of Cardiology and Department  
50 of Medical and Health Sciences, Linköping University, SE 58183 Linköping, Sweden.  
51 E-mail: dimitrios.venetsanos@liu.se  
52  
53  
54  
55  
56  
57  
58  
59  
60

## Abstract

### Objectives

To evaluate gender differences in outcomes in STEMI patients planned for PPCI

### Settings

A pre-specified gender analysis of the multicenter, randomised, double-blind ATLANTIC trial

### Participants

Between September 2011 and October 2013, 1862 patients with STEMI and symptom duration less than 6 hours were included

### Interventions

Patients were assigned to pre-hospital versus in-hospital administration of 180mg ticagrelor.

### Outcomes

The main objective was to study the association between gender and primary and secondary outcomes of the main study with a focus on the clinical efficacy and safety outcomes.

Primary: The proportion of patients who did not have  $\geq 70\%$  resolution of ST segment elevation and did not meet the criteria for TIMI flow 3 at initial angiography. Secondary: the composite of death, MI, stent thrombosis, stroke, or urgent revascularisation and major or minor bleeding at 30 days.

### Results

Women were older, had higher TIMI risk score, longer pre-hospital delays and better TIMI flow in the infarct related artery. Women had a 3-fold higher risk for all-cause mortality compared to men (5.7% vs 1.9%, HR 3.13, 95% CI 1.78 – 5.51). After adjustment, the difference was attenuated but remained statistically significant (HR 2.08, 95% CI 1.03 – 4.20). The incidence of major bleeding events was 2 to 3-fold higher in women compared to men. In the multivariable model, female gender was not an independent predictor of bleeding (PLATO major HR 1.45, 95% CI 0.73-2.86, TIMI major HR 1.28, 95% CI 0.47-3.48, BARC type 3-5 HR 1.45, 95% CI 0.72-2.91). There was no interaction between gender and efficacy or safety of randomised treatment.

### Conclusion

In STEMI patients planned for PPCI-techniques and treated with modern antiplatelet therapy, female gender was an independent predictor of short term mortality. In contrast, the higher

1  
2  
3 incidence of bleeding complications in women could mainly be explained by older age and  
4 clustering of comorbidities.  
5  
6  
7  
8

9  
10 **CLINICAL TRIAL REGISTRATION:** clinicaltrials.gov identifier: NCT01347580.  
11

### 12 13 14 **Strengths and limitations**

- 15 • All patients were planned for primary PCI
- 16 • Current PCI techniques and novel antiplatelet therapy were used
- 17 • Appropriate statistical methods used to adjust for baseline differences between
- 18 genders
- 19 • Our analysis, though prespecified, is applicable to the population studied
- 20 • The large imbalance in the proportion of men and women included caused a reduced
- 21 study power for definitely excluding significant differences in outcomes
- 22  
23  
24  
25  
26  
27  
28  
29  
30  
31  
32  
33  
34  
35  
36  
37  
38  
39  
40  
41  
42  
43  
44  
45  
46  
47  
48  
49  
50  
51  
52  
53  
54  
55  
56  
57  
58  
59  
60

## Introduction

Recent studies have provided evidence of gender differences in the pathophysiology and the clinical expression of atherosclerosis.(1) Several registries in patients with ST-segment elevation myocardial infarction (STEMI) have consistently shown a considerably higher risk of adverse outcomes in women compared to men. Nevertheless, there are conflicting results regarding whether gender is an independent contributor to this observation or the higher risk in women depends on differences in baseline characteristics and comorbidities between genders.(2-8) Although registries of STEMI patients usually include large, unselected populations, they share some inherent limitations. Their results are certainly influenced by differences between genders in the use of timely reperfusion therapy and evidence based drug therapies as well as undetected confounding factors.(9, 10) Therefore, reports of gender-based analyses of randomised controlled trials are of crucial importance in an effort to minimise inequality in the management and evaluate gender as a potential independent risk factor for adverse outcome. Only a few randomised trials of STEMI patients treated with primary PCI (PPCI) have reported results in the context of gender.(11, 12) New treatments (e.g. ticagrelor or prasugrel), special efforts to reduce bleeding (i.e. increased use of radial arterial access, provisional rather than routine use of glycoprotein (GP) IIb/IIIa inhibitor), shorter delay times to reperfusion and a growing awareness regarding gender differences in the management and importance of adherences to evidence based treatment could contribute to improved ischemic and bleeding outcomes in female STEMI patients.

In the ATLANTIC trial, prehospital administration of ticagrelor appeared to be safe but did not significantly improve outcome compared to in hospital administration in patients with STEMI, treated with PPCI according to the current modern standards.(13)

We present a pre-specified gender analysis of the ATLANTIC trial, with the aim of studying the association between gender and outcome.

## Methods

The ATLANTIC study was an international, randomised, double-blind, placebo-controlled study with 30 days follow-up. The design of the study, inclusion and exclusion criteria, outcome definitions and principal results have previously been described.(13, 14) Briefly, 1862 patients presenting with STEMI, less than 6 hours after symptom onset, were included and randomised to pre-hospital (in the ambulance) versus in-hospital (in the catheterisation laboratory) treatment with a loading dose of ticagrelor (180mg) in addition to aspirin and

1  
2  
3 standard clinical care. All patients were to subsequently receive ticagrelor 90 mg twice daily  
4 for 30 days, after which it was recommended that ticagrelor should be continued for up to 12  
5 months. Pre-hospital administration of a GP IIb/IIIa inhibitor was left to the physician's  
6 discretion. Peri-procedural use of parenteral anticoagulants was also left to the physician's  
7 discretion, according to the local practice.  
8  
9

10  
11 The proportion of patients who did not have  $\geq 70\%$  resolution of ST segment elevation before  
12 PCI and / or did not meet the criteria for TIMI flow 3 in the infarct related artery (IRA) at  
13 initial angiography was the primary outcome of the ATLANTIC trial. Secondary outcomes  
14 (clinical efficacy outcomes) included the composite of death, MI, stent thrombosis, stroke, or  
15 urgent revascularisation at 30 days and definite stent thrombosis at 30 days. Safety outcomes  
16 included major and minor bleeding over the 30-day treatment period. Bleeding risk was  
17 evaluated using the TIMI (The Thrombolysis In Myocardial Infarction), BARC (Bleeding  
18 Academic Research Consortium) and PLATO (Study of Platelet Inhibition and Patient  
19 Outcomes) bleeding definitions.(14)  
20  
21

22  
23 The main objective of our analysis was to study the association between gender and primary  
24 and secondary outcomes of the main study with a special focus on the clinical efficacy and  
25 safety outcomes. The interaction of gender subgroups with randomised treatment effects was  
26 also investigated.  
27  
28

29  
30 The trial design and protocol were approved by the national regulatory authorities in all the  
31 participating countries and by the local ethics committee or institutional review board at each  
32 participating site. All patients provided written informed consent.  
33  
34

### 35 36 37 38 39 40 41 42 43 **Statistical analysis**

44  
45 Continuous variables are presented by their mean and standard deviation (SD) or median and  
46 25<sup>th</sup> -75th percentiles as appropriate. Categorical variables are presented as counts and  
47 percentages. Baseline and peri-procedural characteristics were compared according to gender  
48 by chi-square tests for categorical variables and Student's t-test or Mann Whitney U test for  
49 continuous variables, depending on if the variable of interest was normally distributed or not.  
50 A p-value  $< 0.05$  is considered to indicate statistical significance.  
51  
52

53  
54 The incidence of events over time by gender is presented by Kaplan-Meier curves.  
55  
56  
57  
58  
59  
60

1  
2  
3 In order to study the association between gender and the clinical efficacy and safety  
4 outcomes, independent of randomised treatment as well as the possible interactions between  
5 gender and randomised treatment with respect to the outcomes, hazard ratios [HR] with 95%  
6 confidence intervals [CI] were derived from Cox proportional-hazards models. In the  
7 unadjusted (crude) model, gender was the only explanatory variable whereas in the adjusted  
8 multivariable model, gender was forcibly included and the other variables were chosen by  
9 using a forward stepwise selection algorithm with a significant cut-off level of 0.05 for  
10 inclusion. Selection of covariates included in the multivariable analysis was based on  
11 previous studies (3, 4, 6, 15) and clinical experience. Univariate analysis was not performed.  
12 However, this is a common practice in observational studies and we included 18 covariates in  
13 our multivariable analysis that, we believe, incorporated all possible predictors of adverse  
14 outcomes in a STEMI population.

15  
16 Adjustment variables included age, weight, prior MI, prior PCI, history of diabetes,  
17 hypertension, non-hemorrhagic stroke, gastrointestinal bleeding, time from symptom onset to  
18 pre-PCI electrocardiogram [ECG], admission Killip class (as a dichotomous variable 1 / >1),  
19 baseline hemoglobin, estimated glomerular filtration rate (eGFR) according to the MDRD  
20 formula, access site, use of GP IIb/IIIa inhibitor, bivalirudin and UFH, location of MI and  
21 revascularisation. To evaluate the importance of early mortality, a landmark analysis of the  
22 clinical efficacy outcomes was also performed from 48 hours after randomisation (arbitrarily  
23 defined) to the end of the study. In order to explore the importance of bleeding on the clinical  
24 efficacy outcomes, a separate analysis was also performed by censoring the patients who  
25 reported a PLATO major bleeding at the time of the onset of a bleeding event.

26  
27 A comparable statistical process was used to compare gender differences in the effect of  
28 randomised treatment by constructing logistic regression models. Odds ratios [OR] with 95%  
29 CI are presented. The above process for Cox regression and logistic regression was also used  
30 to explore the interaction effect of gender and treatment.

31  
32 For most of the variables included in the multivariable models, only few patients had missing  
33 data (<10 patients). However, 7% of patients had missing values for creatinine, 5% for  
34 hemoglobin and 4% for Killip class. The number of patients with complete data for  
35 multivariable Cox proportional-hazard models of the primary outcome was 1613 (88%).

36  
37 All the analyses were performed using SAS<sup>®</sup> version 9.3.  
38  
39  
40  
41  
42  
43  
44  
45  
46  
47  
48  
49  
50  
51  
52  
53  
54  
55  
56  
57  
58  
59  
60



## Results

### Baseline and peri-procedural characteristics stratified by gender

#### *Demographic and clinical characteristics*

The study population consisted of 369 (20 %) women. They were older (mean age 69 vs. 59 years,  $p<0.01$ ), had lower body mass index (BMI), higher TIMI risk score, more often had a history of hypertension, chronic obstructive pulmonary disease (COPD) and stroke. Men had more frequent prior PCI. No difference was observed between genders with respect to acute heart failure (Killip class  $> 1$ ) and only a minority of patients presented with cardiogenic shock (**Table 1**).

#### *Time delays*

Women had significantly longer delay times, both from symptom onset to prehospital ECG (median 88 vs 70 minutes,  $p<0.01$ ) and from pre-PCI to post-PCI angiography (median 36 vs 32 minutes,  $p=0.03$ ).

#### *Procedural characteristics, angiographic findings, and medication during the index event*

Coronary angiography was more often performed by femoral access in women (39.7% vs 30.4%,  $p<0.01$ ). The genders did not differ according to IRA, with the left anterior descending artery involved in 38% of women and 39% of men. PPCI, with or without stent, was performed significantly more often in men (88.5% vs 83.7%,  $p<0.01$ ) whereas the use of drug eluting stents (DES) was similar. Thromboaspiration, GP IIb/IIIa inhibitors and intravenous anticoagulants were used less often in women. (**Table 1**)

### Association between gender and outcomes independent of randomised treatment

Female gender was associated with significantly higher risk for the composite outcome of death, MI, stroke, urgent revascularisation or definite acute stent thrombosis compared to male gender (6.8% vs 3.9%, crude HR 1.79, 95% CI 1.12 – 2.86) (**Figure 1**). This difference was mainly driven by a 3-fold higher risk for all-cause mortality in women compared to men (5.7% vs 1.9%, HR 3.13, 95% CI 1.78 – 5.51). Although the difference was attenuated in the multivariable model, gender was still associated with all-cause mortality at 30 days (HR 2.08, 95% CI 1.03 – 4.20) (**Figure 2 and table 2**). Landmark analysis for events occurring within

1  
2  
3 48 hours, and between 48 hours and 30 days showed that 38% of the women and 36% of the  
4 men who did not survive the first month died within 48 hours. Comparison after excluding  
5 patients from further analysis at the time point of a PLATO major bleeding event still  
6 revealed a statistically significant association between women and all-cause mortality (4.3%  
7 vs 1.4%. HR 3.20, 95% CI 1.67 – 6.13). Similar result was obtained after adjustment but the  
8 difference between genders did not reach statistical significance (HR 2.15, 95% CI 0.93-  
9 5.00).

10  
11 Female gender was associated with lower risk for TIMI flow < 3 in the IRA at initial  
12 angiography (adjusted OR 0.67, 95% CI 0.47-0.96). The risk of incomplete ST-segment  
13 elevation resolution (<70%) before PCI did not differ significantly between the genders  
14 (adjusted OR 1.11, 95% CI 0.73-1.71). The risk of abnormal TIMI flow in the IRA and  
15 incomplete ST segment elevation resolution after PCI was similar in both genders (**Figure 3**).

16  
17 Women had significantly higher risk for major bleeding complications compared to men,  
18 irrespective of the bleeding definition used (30-day PLATO major bleeding 4.6% vs 2.2%,  
19 HR 2.15, 95% CI 1.18 – 3.85, TIMI major bleeding at 30 days 2.7% vs 0.9%, HR 2.95, 95%  
20 CI 1.31 – 6.65, BARC type 3-5 bleeding 4.3% vs 2.1%, HR 2.15, 95% CI 1.18 – 3.93)  
21 (**Figure 4**). However, after adjustment for baseline and clinical characteristics, female gender  
22 was no longer an independent predictor of risk for bleeding at 30 days. (**Table 2 and figure**  
23 **2**)

### 24 25 26 27 28 29 30 31 32 33 34 35 36 37 **Association between gender and efficacy and safety of randomised treatment**

38  
39 Pre-hospital administration of ticagrelor compared to in-hospital administration resulted in a  
40 non-significant difference in the primary, secondary and safety outcomes. No significant  
41 interactions between randomised treatment and gender in terms of these outcomes were found  
42 in the unadjusted or adjusted model (test for interaction in the multivariable models; p=0.94  
43 for all-cause mortality, p=0.55 for absence of TIMI flow grade 3 in the IRA at initial  
44 angiography, p=0.71 for absence of  $\geq 70\%$  resolution of pre-PCI ST segment elevation, and  
45 p=0.31 for TIMI major bleeding at 30 days). (**Supplementary tables 1, 2 and 3**).

## 51 52 53 54 **Discussion**

55  
56 In the present analysis, unadjusted data showed a significantly higher risk of short term  
57 mortality and bleeding complications in women. After multivariable adjustment female  
58  
59  
60

1  
2  
3 gender remained an independent predictor of mortality whereas advanced age and  
4 comorbidities could mainly explain the higher incidence of bleeding complications in  
5 women.  
6  
7

8  
9 Undoubtedly, older age and clustering of comorbidities in women could explain a large part  
10 of the observed difference in short term clinical outcomes in our study. However, the adjusted  
11 risk for death was still significantly higher in women. The contribution of gender, as  
12 independent risk factor, on adverse outcome may depend on the population studied. The age  
13 gap between genders in our population was substantially higher compared to previous  
14 studies, with a mean age difference of 10 years.(12, 16) In spite of appropriate statistical  
15 methods that were used for adjustment, adjustment for such age-difference is awkward.  
16  
17 Additionally, the age difference may indicate a selection bias. As identification and  
18 randomisation took place in the ambulance, young women with suspected STEMI were  
19 possibly not included in the study as alternative reasons for ST-segment elevation on  
20 prehospital ECG may have been considered more plausible in this group. Furthermore, a  
21 trend toward increased mortality with prehospital ticagrelor was observed in the ATLANTIC  
22 trial that was mainly attributed to a plausible imbalance between the two groups in terms of  
23 the severity of the presenting event. Given the low rate of all-cause mortality, unobserved  
24 confounders in elderly women with STEMI may have significantly contributed to our results  
25 and the findings of the main study. These factors may have a significant impact on the  
26 remaining higher adjusted risk for short-term mortality in women.  
27  
28

29  
30 Previous observational studies in STEMI cohorts, without focus on PPCI treated patients  
31 have shown a higher risk for early mortality in women.(6, 17, 18) Significant differences in  
32 the rate of reperfusion therapy between genders and hidden confounders such as frailty in  
33 elderly women with STEMI may have influenced their results. Recent observational studies  
34 including patients treated with PPCI(4, 19, 20) and pre-specified gender analysis of RCTs(11,  
35 12, 16, 21, 22) have shown that the impact of gender on mortality could mainly be explained  
36 by differences in age and comorbidities between genders.. On the contrary, an observational  
37 study and a meta-analysis have reported higher multivariable adjusted risk of early mortality  
38 in women with STEMI treated with PPCI.(23, 24) Differences in the population studied and  
39 in the covariates included in the multivariable analysis between studies may explain the  
40 conflicting results. Previous studies have clearly demonstrated the importance of body  
41 surface area and the eGFR on prognosis.(25, 26) In a meta-analysis, Berger et al showed that  
42 female gender was an independent predictor of early mortality in STEMI patients. However,  
43  
44  
45  
46  
47  
48  
49  
50  
51  
52  
53  
54  
55  
56  
57  
58  
59  
60

1  
2  
3 30-day mortality was not statistically significant different between genders after additional  
4 adjustment for angiographic disease severity.(27)  
5  
6

7 In the present study, women had a 2-3 times higher unadjusted risk for non-CABG related  
8 bleedings, depending on the definition used. After adjustment for baseline characteristics, no  
9 significant difference remained. Female gender has previously been associated with higher  
10 risk for bleeding complications in patients with ACS.(28-31) Known predictors of bleedings  
11 like advanced age, diabetes, hypertension, renal insufficiency and anemia, are usually more  
12 often encountered in women with STEMI.(15) Additionally, smaller body and vessel size,  
13 higher use of femoral access and overdosing of antithrombotic medication in women may  
14 explain the higher observed risk for bleeding. Procedural-related improvement such as  
15 increased use of radial access or smaller femoral sheaths and careful dose adjustment of  
16 antithrombotic medication, have resulted in a significant decline in the risk of  
17 bleeding/vascular complication during cardiovascular interventions the last years and have  
18 probably contributed to our results.(32) The negative impact of bleedings on prognosis in  
19 patients with STEMI is well established. (15) Our data showed that even after excluding  
20 patients from further analysis at the time of a PLATO major bleeding, the HR for early  
21 mortality in women vs men remained unchanged, implying that reducing the rate of major  
22 bleeding in women may improve their prognosis but is not the main reason for the observed  
23 difference between genders in the early mortality.  
24  
25  
26  
27  
28  
29  
30  
31  
32  
33  
34  
35  
36  
37

38 Some well-known gender disparities in the concomitant management of STEMI patients  
39 remained unchanged. Women were less likely to be treated with GP IIb/IIIa inhibitors and  
40 thrombo-aspiration during PPCI despite lack of gender difference in protection from major  
41 adverse outcomes by GP IIb/IIIa inhibitors (33) and benefit of thrombo-aspiration at the time  
42 when the study was conducted.(34) Similar findings have been provided by large  
43 registries.(7, 8) Some of these lower rates of utilization may be “appropriate” given the  
44 higher TIMI 3 flow rates in the IRA pre-PPCI and lower rates of PPCI in women vs. men.  
45 Furthermore, physician’s concern for higher risk of bleeding in older women with STEMI  
46 have certainly contributed to the lower use of GP IIb/IIIa inhibitors in women.  
47  
48  
49  
50  
51  
52

53 Although the impact of early reperfusion on mortality in STEMI patients is now  
54 unquestionable,(35) patients’ delay from symptom onset to prehospital ECG was not an  
55 independent predictor of mortality in our study, in agreement with results from previous  
56  
57  
58  
59  
60

1  
2  
3 gender analyses.(36, 37) A plausible explanation is an association between age and delay,  
4 and thus adjustment for age minimizes the relative impact of delay. Furthermore, in PPCI,  
5 female gender has been associated with similar or even smaller infarct size than that in male  
6 gender, due to longer prehospital delays, indicating that other factors than larger infarct size  
7 secondary to longer prehospital delay mainly contribute to the observed higher unadjusted  
8 short term mortality.(36) The proportion of 30 day mortality that occurred within 48 hours of  
9 admission was similar in women and men (38% vs 36% respectively) contrasting previous  
10 data where gender differences in early mortality were accounted for by excess very early  
11 (within 24-48 hours) deaths in women with STEMI.(7, 18) Cardiogenic shock and  
12 hemodynamic instability were key exclusion criteria in the ATLANTIC trial which may have  
13 influenced these results. Cardiogenic shock has been shown to be more common in women  
14 and female gender has been highly associated with mortality in shock patients.(20)

15  
16  
17  
18  
19  
20  
21  
22  
23  
24 In terms of ST-segment elevation resolution and TIMI flow 3 rates before and after PCI, no  
25 significant difference between genders was observed apart from a lower risk of abnormal  
26 coronary flow in IRA at initial angiography in women. The higher rate of TIMI flow 3 at  
27 initial angiography may be explained by the higher rate of normal coronary arteries as well as  
28 the less obstructive coronary artery disease in women with STEMI, which is in concordance  
29 with previous data.(37)

30  
31  
32  
33  
34 The analysis of the effect of gender on outcomes dependent on the randomised treatment  
35 showed no statistically significant interactions. Pre-hospital administration of ticagrelor did  
36 not improve pre- or post-PCI coronary reperfusion as assessed by TIMI flow in IRA and  
37 resolution of ST elevation pre-PCI. Clinical efficacy outcomes were not significantly  
38 improved either. However, prehospital administration of ticagrelor was safe in both genders  
39 with similar rate of major and minor bleedings.

### 40 41 42 43 44 45 46 **Strengths and limitations**

47  
48 The present study has some important limitations. Our results are applicable to the  
49 populations studied, STEMI patients pretreated with ticagrelor and planned for primary PCI.  
50 The ATLANTIC study population is from a randomized controlled trial, with inclusion and  
51 exclusion criteria contributing to differences relative to populations treated in routine clinical  
52 practice, and thereby limiting generalisability. However, the proportion of elderly patients  
53 (>75 years) was higher than in the PLATO trial, especially for women, and

1  
2  
3 underrepresentation of women in clinical trials is a well recognised problem. Moreover, the  
4 study was conducted at several centers and countries increasing external validity. Taken  
5 together our results should be applied to a real-world STEMI population with caution.  
6  
7 Additionally, the ATLANTIC trial was not stratified by gender. The large imbalance in the  
8 proportion of men and women included, commonly encountered in a STEMI population,  
9 caused a reduced power for detecting or definitely excluding significant differences in some  
10 outcomes between the genders or to definitely exclude an interaction between gender and the  
11 randomised treatment.  
12  
13

14  
15  
16  
17 The most important strength of our analysis is that patients were treated according to the  
18 current guidelines of STEMI, with PPCI as the reperfusion strategy of choice, administration  
19 of the modern ADP receptor-blocker ticagrelor in addition to aspirin as soon as possible after  
20 the first medical contact, high use of radial access during catheterisation and adjuvant  
21 pharmacologic treatment during PPCI with UFH or bivalirudin. (38) Therefore our study  
22 provides important information about differences and similarities between genders in STEMI  
23 patients treated with current PCI techniques and pharmacologic treatment.  
24  
25  
26  
27  
28  
29

## 30 Conclusion

31  
32 In patients with STEMI, planned for PPCI and treated with modern antiplatelet therapy,  
33 female gender identifies a group of patients with high risk of early mortality in whom prompt  
34 efforts to improve outcome are warranted. Female gender was not an independent predictor  
35 of bleeding but advanced age and clustering of comorbidities in women could mainly explain  
36 their higher unadjusted risk for bleeding events compared to men. Prehospital administration  
37 of ticagrelor had a similar efficacy and safety profile in men and women with STEMI.  
38  
39  
40  
41  
42  
43  
44  
45  
46  
47  
48  
49  
50  
51  
52  
53  
54  
55  
56  
57  
58  
59  
60

## Acknowledgements

Statistical analysis was performed by Richard Cairns from Worldwide Clinical Trials UK. The authors would like to thank all patients who took part in this study. Editorial support was provided by Liz Anfield, Prime Medica Ltd, Knutsford, Cheshire, and was funded by AstraZeneca.

## Funding statement

The main ATLANTIC trial was financed by AstraZeneca. Editorial support for this study was funded by AstraZeneca.

## Data sharing statement

Original data are available on request. Please contact the corresponding author for further information.

## Interest statement

D.V. reports that he has no relationships relevant to the contents of this paper to disclose.

S.S.L. reports that she has no relationships relevant to the contents of this paper to disclose.

J.A. reports receiving lecture fees from AstraZeneca.

M.J. reports receiving lecture fees from AstraZeneca and Sanofi.

A.C. reports that he has no relationships relevant to the contents of this paper to disclose.

M.C. reports that he has no relationships relevant to the contents of this paper to disclose.

S.G.G. reports receiving research grants and speaker/consulting honoraria from AstraZeneca, Daiichi Sankyo, Eli Lilly, Sanofi, Bristol-Myers Squibb, Merck, and The Medicines Company.

A.W. v.H. reports receiving research and educational grants from Abbott, AstraZeneca, Eli Lilly/Daiichi Sankyo, Merck/Correio, Medtronic, and The Medicines Company and speaker fees from Boehringer Ingelheim, Abbott, AstraZeneca, Eli Lilly/Daiichi Sankyo, Merck/Correio, Medtronic, The Medicines Company, Pfizer, and Sanofi.

G.M. reports receiving research grants to the Institution or consulting/lecture fees from Acuitude, ADIR, Amgen, AstraZeneca, Bayer, Berlin Chimie AG, Boehringer Ingelheim, Bristol-Myers Squibb, Brigham Women's Hospital, Cardiovascular Research Foundation, Celladon, CME resources, Daiichi-Sankyo, Eli-Lilly, Europa, Fédération Française de Cardiologie, Gilead, Hopitaux Universitaires Genève, ICAN, Janssen-Cilag, Lead-Up, Medcon International, Menarini, Medtronic, MSD, Pfizer, Recor, Sanofi-Aventis, Stentys, The Medicines Company, TIMI Study Group, Universitat Basel, WebMD, and Zoll Medical.

E. Swahn reports receiving lecture fees from AstraZeneca.



### Author's contribution

E. Swahn is responsible for the conception and design of the gender substudy of the ATLANTIC trial. D. Venetsanos is responsible for analyses and interpretation of the data and drafted the manuscript. S. Sederholm Lawesson, J. Alfredsson, M. Janzon, A. Cequier, M. Chettibi, S.G. Goodman, A.W. van't Hof and G. Montalescot have critically revised the manuscript and added important intellectual content.

All authors have participated in the work and have read and approved the manuscript.

For peer review only



## References

1. Bairey Merz CN, Shaw LJ, Reis SE, Bittner V, Kelsey SF, Olson M, et al. Insights from the NHLBI-Sponsored Women's Ischemia Syndrome Evaluation (WISE) Study: Part II: gender differences in presentation, diagnosis, and outcome with regard to gender-based pathophysiology of atherosclerosis and macrovascular and microvascular coronary disease. *Journal of the American College of Cardiology*. 2006 Feb 7;47(3 Suppl):S21-9. PubMed PMID: 16458167.
2. Mehta RH, Stebbins AS, Lopes RD, Califf RM, Pieper KS, Armstrong PW, et al. Comparison of incidence of bleeding and mortality of men versus women with ST-elevation myocardial infarction treated with fibrinolysis. *The American journal of cardiology*. 2012 Feb 1;109(3):320-6. PubMed PMID: 22078221.
3. Kyto V, Sipila J, Rautava P. Gender and in-hospital mortality of ST-segment elevation myocardial infarction (from a multihospital nationwide registry study of 31,689 patients). *The American journal of cardiology*. 2015 Feb 1;115(3):303-6. PubMed PMID: 25488357.
4. Jakobsen L, Niemann T, Thorsgaard N, Nielsen TT, Thuesen L, Lassen JF, et al. Sex- and age-related differences in clinical outcome after primary percutaneous coronary intervention. *EuroIntervention : journal of EuroPCR in collaboration with the Working Group on Interventional Cardiology of the European Society of Cardiology*. 2012 Dec 20;8(8):904-11. PubMed PMID: 23253544.
5. Kang SH, Suh JW, Yoon CH, Cho MC, Kim YJ, Chae SC, et al. Sex differences in management and mortality of patients with ST-elevation myocardial infarction (from the Korean Acute Myocardial Infarction National Registry). *The American journal of cardiology*. 2012 Mar 15;109(6):787-93. PubMed PMID: 22196789.
6. Lawesson SS, Alfredsson J, Fredrikson M, Swahn E. A gender perspective on short- and long term mortality in ST-elevation myocardial infarction--a report from the SWEDHEART register. *International journal of cardiology*. 2013 Sep 30;168(2):1041-7. PubMed PMID: 23168004.
7. de Boer SP, Roos-Hesselink JW, van Leeuwen MA, Lenzen MJ, van Geuns RJ, Regar E, et al. Excess mortality in women compared to men after PCI in STEMI: an analysis of 11,931 patients during 2000-2009. *International journal of cardiology*. 2014 Sep 20;176(2):456-63. PubMed PMID: 25127966.
8. Leurent G, Garlantezec R, Auffret V, Hacot JP, Coudert I, Filippi E, et al. Gender differences in presentation, management and inhospital outcome in patients with ST-segment elevation myocardial infarction: data from 5000 patients included in the ORBI prospective French regional registry. *Archives of cardiovascular diseases*. 2014 May;107(5):291-8. PubMed PMID: 24910083.

- 1  
2  
3 9. Lawesson SS, Alfredsson J, Fredrikson M, Swahn E. Time trends in STEMI--improved  
4 treatment and outcome but still a gender gap: a prospective observational cohort study from the  
5 SWEDHEART register. *BMJ open*. 2012;2(2):e000726. PubMed PMID: 22457480. Pubmed Central  
6 PMCID: 3323814.  
7  
8  
9  
10 10. Pilgrim T, Heg D, Tal K, Erne P, Radovanovic D, Windecker S, et al. Age- and Gender-  
11 related Disparities in Primary Percutaneous Coronary Interventions for Acute ST-segment  
12 elevation Myocardial Infarction. *PloS one*. 2015;10(9):e0137047. PubMed PMID: 26352574.  
13 Pubmed Central PMCID: 4564139.  
14  
15 11. Lansky AJ, Pietras C, Costa RA, Tsuchiya Y, Brodie BR, Cox DA, et al. Gender  
16 differences in outcomes after primary angioplasty versus primary stenting with and without  
17 abciximab for acute myocardial infarction: results of the Controlled Abciximab and Device  
18 Investigation to Lower Late Angioplasty Complications (CADILLAC) trial. *Circulation*. 2005 Apr  
19 5;111(13):1611-8. PubMed PMID: 15811868.  
20  
21  
22 12. Motovska Z, Widimsky P, Aschermann M, Investigators PSG. The impact of gender  
23 on outcomes of patients with ST elevation myocardial infarction transported for percutaneous  
24 coronary intervention: analysis of the PRAGUE-1 and 2 studies. *Heart*. 2008 Mar;94(3):e5. PubMed  
25 PMID: 17693459.  
26  
27  
28 13. Montalescot G, van 't Hof AW, Lapostolle F, Silvain J, Lassen JF, Bolognese L, et al.  
29 Prehospital ticagrelor in ST-segment elevation myocardial infarction. *The New England journal of*  
30 *medicine*. 2014 Sep 11;371(11):1016-27. PubMed PMID: 25175921.  
31  
32  
33 14. Montalescot G, Lassen JF, Hamm CW, Lapostolle F, Silvain J, ten Berg JM, et al.  
34 Ambulance or in-catheterization laboratory administration of ticagrelor for primary percutaneous  
35 coronary intervention for ST-segment elevation myocardial infarction: rationale and design of the  
36 randomized, double-blind Administration of Ticagrelor in the cath Lab or in the Ambulance for  
37 New ST elevation myocardial Infarction to open the Coronary artery (ATLANTIC) study. *American*  
38 *heart journal*. 2013 Apr;165(4):515-22. PubMed PMID: 23537967.  
39  
40  
41 15. Manoukian SV, Feit F, Mehran R, Voeltz MD, Ebrahimi R, Hamon M, et al. Impact of  
42 major bleeding on 30-day mortality and clinical outcomes in patients with acute coronary  
43 syndromes: an analysis from the ACUITY Trial. *Journal of the American College of Cardiology*. 2007  
44 Mar 27;49(12):1362-8. PubMed PMID: 17394970.  
45  
46  
47 16. Wijnbergen I, Tijssen J, van 't Veer M, Michels R, Pijls NH. Gender differences in  
48 long-term outcome after primary percutaneous intervention for ST-segment elevation myocardial  
49 infarction. *Catheterization and cardiovascular interventions : official journal of the Society for*  
50 *Cardiac Angiography & Interventions*. 2013 Sep 1;82(3):379-84. PubMed PMID: 23553888.  
51  
52  
53  
54  
55  
56  
57  
58  
59  
60

- 1  
2  
3 17. Champney KP, Frederick PD, Bueno H, Parashar S, Foody J, Merz CN, et al. The joint  
4 contribution of sex, age and type of myocardial infarction on hospital mortality following acute  
5 myocardial infarction. *Heart*. 2009 Jun;95(11):895-9. PubMed PMID: 19147625. Pubmed Central  
6 PMCID: 3065924.  
7  
8  
9 18. Jneid H, Fonarow GC, Cannon CP, Hernandez AF, Palacios IF, Marea AO, et al. Sex  
10 differences in medical care and early death after acute myocardial infarction. *Circulation*. 2008 Dec  
11 16;118(25):2803-10. PubMed PMID: 19064680.  
12  
13  
14 19. Jackson EA, Moscucci M, Smith DE, Share D, Dixon S, Greenbaum A, et al. The  
15 association of sex with outcomes among patients undergoing primary percutaneous coronary  
16 intervention for ST elevation myocardial infarction in the contemporary era: Insights from the Blue  
17 Cross Blue Shield of Michigan Cardiovascular Consortium (BMC2). *American heart journal*. 2011  
18 Jan;161(1):106-12 e1. PubMed PMID: 21167341.  
19  
20  
21  
22 20. Suessenbacher A, Doerler J, Alber H, Aichinger J, Altenberger J, Benzer W, et al.  
23 Gender-related outcome following percutaneous coronary intervention for ST-elevation  
24 myocardial infarction: data from the Austrian acute PCI registry. *EuroIntervention : journal of  
25 EuroPCR in collaboration with the Working Group on Interventional Cardiology of the European  
26 Society of Cardiology*. 2008 Aug;4(2):271-6. PubMed PMID: 19110794.  
27  
28  
29 21. Husted S, James SK, Bach RG, Becker RC, Budaj A, Heras M, et al. The efficacy of  
30 ticagrelor is maintained in women with acute coronary syndromes participating in the prospective,  
31 randomized, PLATelet inhibition and patient Outcomes (PLATO) trial. *European heart journal*. 2014  
32 Jun 14;35(23):1541-50. PubMed PMID: 24682844. Pubmed Central PMCID: 4057642.  
33  
34  
35 22. De Luca G, Gibson CM, Gyongyosi M, Zeymer U, Dudek D, Arntz HR, et al. Gender-  
36 related differences in outcome after ST-segment elevation myocardial infarction treated by  
37 primary angioplasty and glycoprotein IIb-IIIa inhibitors: insights from the EGYPT cooperation.  
38 *Journal of thrombosis and thrombolysis*. 2010 Oct;30(3):342-6. PubMed PMID: 20213259.  
39  
40  
41 23. Benamer H, Tafflet M, Bataille S, Escolano S, Livarek B, Fourchard V, et al. Female  
42 gender is an independent predictor of in-hospital mortality after STEMI in the era of primary PCI:  
43 insights from the greater Paris area PCI Registry. *EuroIntervention : journal of EuroPCR in  
44 collaboration with the Working Group on Interventional Cardiology of the European Society of  
45 Cardiology*. 2011 Apr;6(9):1073-9. PubMed PMID: 21518679.  
46  
47  
48 24. Pancholy SB, Shantha GP, Patel T, Cheskin LJ. Sex differences in short-term and long-  
49 term all-cause mortality among patients with ST-segment elevation myocardial infarction treated  
50 by primary percutaneous intervention: a meta-analysis. *JAMA internal medicine*. 2014  
51 Nov;174(11):1822-30. PubMed PMID: 25265319.  
52  
53  
54  
55  
56  
57  
58  
59  
60

1  
2  
3 25. Peterson ED, Lansky AJ, Kramer J, Anstrom K, Lanzilotta MJ, National Cardiovascular  
4 Network Clinical I. Effect of gender on the outcomes of contemporary percutaneous coronary  
5 intervention. *The American journal of cardiology*. 2001 Aug 15;88(4):359-64. PubMed PMID:  
6 11545754.

7  
8  
9 26. Sederholm Lawesson S, Todt T, Alfredsson J, Janzon M, Stenestrand U, Swahn E.  
10 Gender difference in prevalence and prognostic impact of renal insufficiency in patients with ST-  
11 elevation myocardial infarction treated with primary percutaneous coronary intervention. *Heart*.  
12 2011 Feb;97(4):308-14. PubMed PMID: 21212134.

13  
14  
15 27. Berger JS, Elliott L, Gallup D, Roe M, Granger CB, Armstrong PW, et al. Sex  
16 differences in mortality following acute coronary syndromes. *JAMA : the journal of the American*  
17 *Medical Association*. 2009 Aug 26;302(8):874-82. PubMed PMID: 19706861. Pubmed Central  
18 PMCID: 2778841.

19  
20  
21 28. Steg PG, Huber K, Andreotti F, Arnesen H, Atar D, Badimon L, et al. Bleeding in acute  
22 coronary syndromes and percutaneous coronary interventions: position paper by the Working  
23 Group on Thrombosis of the European Society of Cardiology. *European heart journal*. 2011  
24 Aug;32(15):1854-64. PubMed PMID: 21715717.

25  
26  
27 29. Mehran R, Pocock SJ, Nikolsky E, Clayton T, Dangas GD, Kirtane AJ, et al. A risk score  
28 to predict bleeding in patients with acute coronary syndromes. *Journal of the American College of*  
29 *Cardiology*. 2010 Jun 8;55(23):2556-66. PubMed PMID: 20513595.

30  
31  
32 30. Becker RC, Bassand JP, Budaj A, Wojdyla DM, James SK, Cornel JH, et al. Bleeding  
33 complications with the P2Y12 receptor antagonists clopidogrel and ticagrelor in the PLATElet  
34 inhibition and patient Outcomes (PLATO) trial. *European heart journal*. 2011 Dec;32(23):2933-44.  
35 PubMed PMID: 22090660.

36  
37  
38 31. Mathews R, Peterson ED, Chen AY, Wang TY, Chin CT, Fonarow GC, et al. In-hospital  
39 major bleeding during ST-elevation and non-ST-elevation myocardial infarction care: derivation  
40 and validation of a model from the ACTION Registry(R)-GWTG. *The American journal of cardiology*.  
41 2011 Apr 15;107(8):1136-43. PubMed PMID: 21324428.

42  
43  
44 32. Ahmed B, Piper WD, Malenka D, VerLee P, Robb J, Ryan T, et al. Significantly  
45 improved vascular complications among women undergoing percutaneous coronary intervention:  
46 a report from the Northern New England Percutaneous Coronary Intervention Registry. *Circulation*  
47 *Cardiovascular interventions*. 2009 Oct;2(5):423-9. PubMed PMID: 20031752.

48  
49  
50 33. Cho L, Topol EJ, Balog C, Foody JM, Booth JE, Cabot C, et al. Clinical benefit of  
51 glycoprotein IIb/IIIa blockade with Abciximab is independent of gender: pooled analysis from EPIC,  
52 EPILOG and EPISTENT trials. Evaluation of 7E3 for the Prevention of Ischemic Complications.  
53 Evaluation in Percutaneous Transluminal Coronary Angioplasty to Improve Long-Term Outcome  
54 with Abciximab GP IIb/IIIa blockade. Evaluation of Platelet IIb/IIIa Inhibitor for Stent. *Journal of*  
55 *the American College of Cardiology*. 2000 Aug;36(2):381-6. PubMed PMID: 10933346.

- 1  
2  
3 34. Vlaar PJ, Svilaas T, van der Horst IC, Diercks GF, Fokkema ML, de Smet BJ, et al. Cardiac death and reinfarction after 1 year in the Thrombus Aspiration during Percutaneous coronary intervention in Acute myocardial infarction Study (TAPAS): a 1-year follow-up study. *Lancet*. 2008 Jun 7;371(9628):1915-20. PubMed PMID: 18539223.
- 4  
5  
6  
7  
8  
9 35. De Luca G, Suryapranata H, Ottervanger JP, Antman EM. Time delay to treatment and mortality in primary angioplasty for acute myocardial infarction: every minute of delay counts. *Circulation*. 2004 Mar 16;109(10):1223-5. PubMed PMID: 15007008.
- 10  
11  
12  
13  
14 36. Sadowski M, Gasior M, Gierlotka M, Janion M, Polonski L. Gender-related differences in mortality after ST-segment elevation myocardial infarction: a large multicentre national registry. *EuroIntervention : journal of EuroPCR in collaboration with the Working Group on Interventional Cardiology of the European Society of Cardiology*. 2011 Apr;6(9):1068-72. PubMed PMID: 21518678.
- 15  
16  
17  
18  
19  
20  
21  
22 37. Otten AM, Maas AH, Ottervanger JP, Kloosterman A, van 't Hof AW, Dambrink JH, et al. Is the difference in outcome between men and women treated by primary percutaneous coronary intervention age dependent? Gender difference in STEMI stratified on age. *European heart journal Acute cardiovascular care*. 2013 Dec;2(4):334-41. PubMed PMID: 24338292. Pubmed Central PMCID: 3821825.
- 23  
24  
25  
26  
27  
28  
29 38. Wessler JD, Stant J, Duru S, Rabbani L, Kirtane AJ. Updates to the ACCF/AHA and ESC STEMI and NSTEMI guidelines: putting guidelines into clinical practice. *The American journal of cardiology*. 2015 Mar 14;115(5 Suppl):23A-8A. PubMed PMID: 25728971.
- 30  
31  
32  
33  
34  
35  
36

### Figure legends

37  
38  
39 Figure 1. Cumulative Kaplan-Meier estimates of the incidence of the composite endpoint of death, MI, stroke, urgent revascularisation or definite acute stent thrombosis and all-cause mortality at 30 days by gender.

40  
41  
42  
43 Figure 2. Association between gender and clinical efficacy and safety outcomes independent of randomised treatment.

44  
45  
46 Figure 3. Association between gender and primary and secondary outcomes, independent of randomised treatment.

47  
48  
49 Figure 4. Cumulative Kaplan-Meier estimates of the incidence of the TIMI major bleeding and BARC type 3-5 bleeding at 30 days by gender.

50  
51  
52  
53  
54  
55  
56  
57  
58  
59  
60

**Table 1.** Baseline, clinical and periprocedural characteristics according to gender.

| Characteristics                                                        | Women (n=369)    | Men (n=1493)     | P- value |
|------------------------------------------------------------------------|------------------|------------------|----------|
| Age, years; mean (SD)                                                  | 69 (13.0)        | 59 (11)          | <0.01    |
| Age ≥75 years                                                          | 153 (41.5)       | 151 (10.1)       | <0.01    |
| BMI, kg/m <sup>2</sup> ; median (IQR)                                  | 25.6 (22.5-29.1) | 26.5 (24.3-29.4) | <0.01    |
| Prior history                                                          |                  |                  |          |
| Diabetes mellitus                                                      | 48 (13.0)        | 205 (13.7)       | 0.72     |
| Hypertension                                                           | 190 (51.5)       | 605 (40.5)       | <0.01    |
| Dyslipidemia                                                           | 117 (31.7)       | 536 (35.9)       | 0.13     |
| Angina                                                                 | 36 (9.8)         | 157 (10.5)       | 0.67     |
| Prior myocardial infarction                                            | 24 (6.5)         | 135 (9.0)        | 0.67     |
| Prior PCI                                                              | 16 (4.3)         | 124 (8.3)        | <0.01    |
| Prior CABG                                                             | 1 (0.3)          | 11 (0.7)         | 0.32     |
| Prior non-haemorrhagic stroke                                          | 8 (2.2)          | 10 (0.7)         | <0.01    |
| Chronic obstructive pulmonary disease                                  | 22 (6.0)         | 54 (3.6)         | 0.04     |
| Gastrointestinal bleeding                                              | 1 (0.3)          | 16 (1.1)         | 0.15     |
| Chronic renal disease                                                  | 7 (1.9)          | 27 (1.8)         | 0.91     |
| Index event information                                                |                  |                  |          |
| First medical contact in ambulance                                     | 280 (75.9)       | 1132 (75.8)      | 0.24     |
| Minutes from symptom onset to pre-hospital ECG, median (IQR)           | 88 (49-169)      | 70 (41-129)      | <0.01    |
| Minutes from prehospital ECG to PCI, median (IQR)                      | 83 (68-101)      | 80 (66-96)       | 0.03     |
| Minutes from pre-PCI angiography to post-PCI angiography, median (IQR) | 36 (24-52)       | 32 (23-45)       | 0.03     |
| Received first loading dose                                            | 369 (100)        | 1488 (99.7)      | 0.27     |
| Risk level at admission                                                |                  |                  |          |
| Killip class                                                           |                  |                  |          |
| I                                                                      | 332 (90.0)       | 1349 (90.4)      | 0.82     |
| IV                                                                     | 2 (0.5)          | 3 (0.2)          |          |
| TIMI risk score                                                        |                  |                  |          |
| 0-2                                                                    | 119 (32.2)       | 1006 (67.4)      | 0.01     |
| 3-6                                                                    | 231 (62.6)       | 471 (31.5)       |          |
| >6                                                                     | 19 (5.1)         | 16 (1.1)         |          |
| Culprit vessel                                                         |                  |                  |          |
| Left main artery                                                       | 4 (1.1)          | 18 (1.2)         | 0.63     |

|    |                                                        |            |             |       |
|----|--------------------------------------------------------|------------|-------------|-------|
| 1  |                                                        |            |             |       |
| 2  |                                                        |            |             |       |
| 3  | Left anterior descending artery                        | 141 (38.8) | 571 (39.0)  |       |
| 4  | Right coronary artery                                  | 150 (41.3) | 590 (40.3)  |       |
| 5  | Left circumflex                                        | 39 (10.7)  | 196 (13.4)  |       |
| 6  | No culprit vessel identified                           | 28 (7.7)   | 85 (5.8)    |       |
| 7  | Normal coronary angiography                            | 27 (7.4)   | 76 (5.2)    | 0.1   |
| 8  | Procedures for index event                             |            |             |       |
| 9  | Femoral access                                         | 144 (39.7) | 445 (30.4)  | <0.01 |
| 10 | Thromboaspiration                                      | 160 (43.4) | 781 (52.3)  | <0.01 |
| 11 | PCI                                                    | 309 (83.7) | 1321 (88.5) | 0.01  |
| 12 | With any stent                                         | 288 (78.0) | 1248 (83.6) | 0.01  |
| 13 | With DES                                               | 185 (50.1) | 761 (51.0)  | 0.77  |
| 14 | Coronary artery bypass grafting                        | 4 (1.1)    | 21 (1.4)    | 0.63  |
| 15 | No revascularisation                                   | 56 (15.2)  | 151 (10.1)  | <0.01 |
| 16 | Any glycoprotein IIb/IIIa inhibitor use                | 115 (31.2) | 598 (40.1)  | <0.01 |
| 17 | Glycoprotein IIb/IIIa inhibitor use before angiography | 14 (3.8)   | 116 (7.8)   | <0.01 |
| 18 | Intravenous anticoagulant prior to pre-PCI angiography | 231 (62.6) | 1027 (68.8) | 0.02  |
| 19 | Intravenous anticoagulant during hospitalisation †     | 310 (84.0) | 1332 (89.2) | <0.01 |
| 20 | Heparin only                                           | 135 (36.6) | 584 (39.1)  | 0.02  |
| 21 | Bivalirudin only                                       | 29 (7.9)   | 65 (4.4)    | 0.02  |

Variables presented as numbers (percentages) unless otherwise indicated.

BMI, body mass index; CABG, coronary artery bypass grafting; DES, drug-eluting stent; IQR, interquartile range (25<sup>th</sup>–75<sup>th</sup> percentile); PCI, percutaneous coronary intervention; SD, standard deviation; TIMI, Thrombolysis In Myocardial Infarction.

† Includes all IV medications given on the date of the qualifying ECG and /or index PCI



**Table 2** Association between gender and clinical outcomes independent of randomised treatment

| Outcomes                                                                              | Female (n=369)                   | Male (n=1489)                    | Crude hazard ratio<br>(95%CI)<br>(n included=1858) | Adjusted hazard<br>ratio (95%CI)*<br>(n included=1613) | P-value * |
|---------------------------------------------------------------------------------------|----------------------------------|----------------------------------|----------------------------------------------------|--------------------------------------------------------|-----------|
|                                                                                       | Patients with<br>endpoint, n (%) | Patients with<br>endpoint, n (%) |                                                    |                                                        |           |
| Mortality and cardiovascular outcomes                                                 |                                  |                                  |                                                    |                                                        |           |
| Composite of death/MI/stroke/urgent revascularisation/definite acute stent thrombosis | 25 (6.8)                         | 58 (3.9)                         | 1.79 (1.12-2.86)                                   | 1.32 (0.77-2.27)                                       | 0.32      |
| Composite of death/MI/urgent revascularisation                                        | 23 (6.2)                         | 50 (3.4)                         | 1.91 (1.17-3.13)                                   | 1.33 (0.75-2.36)                                       | 0.32      |
| All-cause mortality                                                                   | 21 (5.7)                         | 28 (1.9)                         | 3.13 (1.78-5.51)                                   | 2.08 (1.03-4.20)                                       | 0.04      |
| Myocardial infarction                                                                 | 3 (0.8)                          | 14 (0.9)                         | 0.90 (0.26-3.13)                                   | 0.82 (0.23-2.85)                                       | 0.76      |
| Stroke                                                                                | 3 (0.8)                          | 3 (0.2)                          | 4.18 (0.84-20.70)                                  | 4.14 (0.84-20.51)                                      | 0.08      |
| Urgent revascularisation                                                              | 2 (0.5)                          | 11 (0.7)                         | 0.75 (0.17-3.38)                                   | 0.69 (0.15-3.11)                                       | 0.63      |
| Definite acute stent thrombosis                                                       | 3 (0.8)                          | 10 (0.7)                         | 1.23 (0.34-4.49)                                   | 1.29 (0.35-4.76)                                       | 0.70      |
| Acute stent thrombosis (definite or probable)                                         | 11 (3.0)                         | 30 (2.0)                         | 1.53 (0.77-3.05)                                   | 0.88 (0.39-1.98)                                       | 0.76      |
| Safety outcomes                                                                       |                                  |                                  |                                                    |                                                        |           |
| PLATO major bleeding **                                                               | 17 (4.6)                         | 33 (2.2)                         | 2.15 (1.20-3.85)                                   | 1.45 (0.73-2.86)                                       | 0.29      |
| TIMI major bleeding **                                                                | 10 (2.7)                         | 14 (0.9)                         | 2.95 (1.31-6.65)                                   | 1.28 (0.47-3.48)                                       | 0.63      |



1  
2  
3  
4  
5  
6  
7  
8  
9  
10  
11  
12  
13  
14  
15  
16  
17  
18  
19  
20  
21  
22  
23  
24  
25  
26  
27  
28  
29  
30  
31  
32  
33  
34  
35  
36  
37  
38  
39  
40  
41  
42  
43  
44  
45  
46  
47  
48  
49

---

|                                           |          |          |                  |                  |      |
|-------------------------------------------|----------|----------|------------------|------------------|------|
| TIMI major or minor bleeding**            | 18 (4.9) | 54 (3.6) | 1.38 (0.81-2.35) | 0.94 (0.51-1.74) | 0.85 |
| BARC type 3-5 (major) bleeding**          | 16 (4.3) | 31 (2.1) | 2.15 (1.18-3.93) | 1.45 (0.72-2.91) | 0.30 |
| BARC type 2-5 (major or minor) bleeding** | 20 (5.4) | 56 (3.8) | 1.48 (0.89-2.47) | 1.03 (0.57-1.84) | 0.93 |

\*Hazard ratio (for female versus male) and p-value calculated from logistic regression model including gender, age, weight, prior myocardial infarction, prior percutaneous coronary intervention, diabetes, hypertension, non-hemorrhagic stroke, gastrointestinal bleeding, time from symptom onset to pre-hospital ECG, admission Killip class, baseline hemoglobin, estimated glomerular filtration rate, access site, glycoprotein IIb/IIIa inhibitor, bivalirudin or unfractionated heparin use during index procedure, revascularization and location of myocardial infarction

\*\*Non-CABG related bleeding occurring up to the date of the last study visit (to the maximum of 32 days) are included in the table

BARC, Bleeding Academic Research Consortium; MI, myocardial infarction; PLATO, Study of Platelet Inhibition and Patient Outcomes; TIMI, Thrombolysis in Myocardial Infarction

---

For peer review only

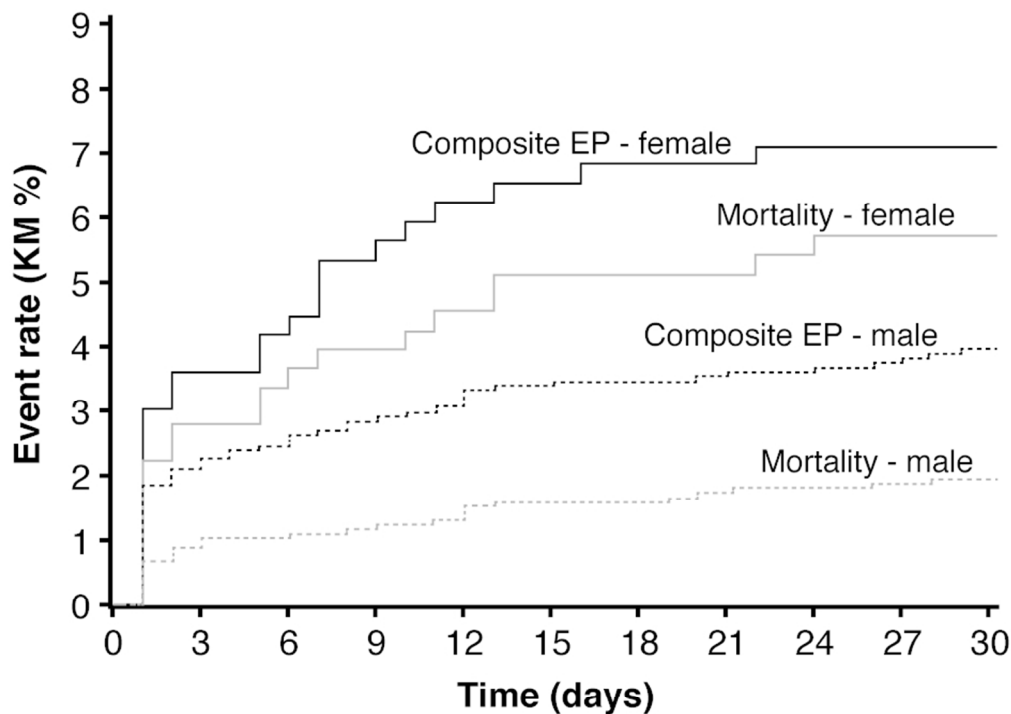

| Composite endpoint   | All-cause mortality  |
|----------------------|----------------------|
| Female 25/369 (6.8%) | Female 21/369 (5.7%) |
| Male 58/1489 (3.9%)  | Male 28/1489 (1.9%)  |

Caption : Figure 1. Cumulative Kaplan-Meier estimates of the incidence of the composite endpoint of death, MI, stroke, urgent revascularisation or definite acute stent thrombosis and all-cause mortality at 30 days by gender.

79x70mm (300 x 300 DPI)

only

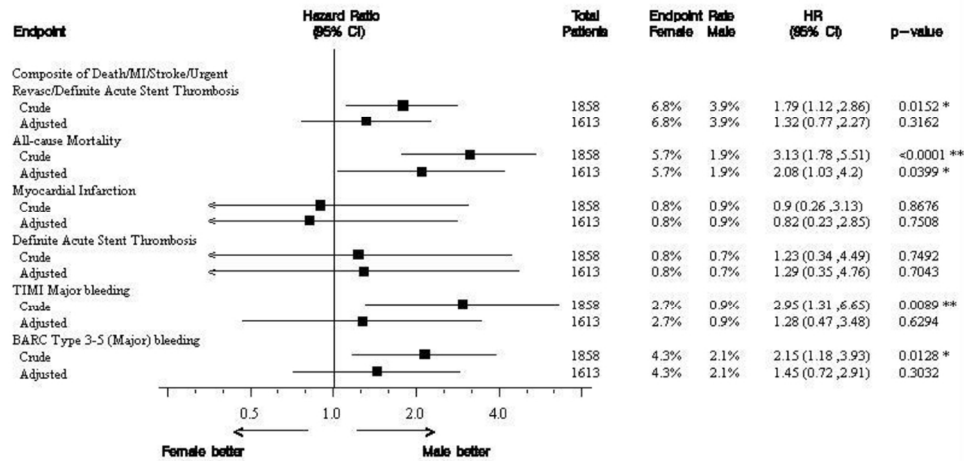

Figure 2. Association between gender and clinical efficacy and safety outcomes independent of randomised treatment.

112x64mm (300 x 300 DPI)

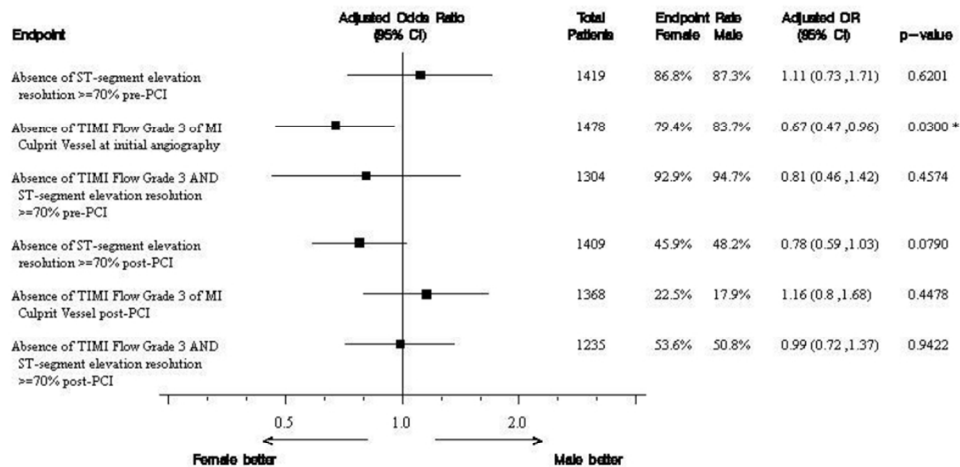

Figure 3. Association between gender and primary and secondary outcomes, independent of randomised treatment.

84x53mm (300 x 300 DPI)

view only

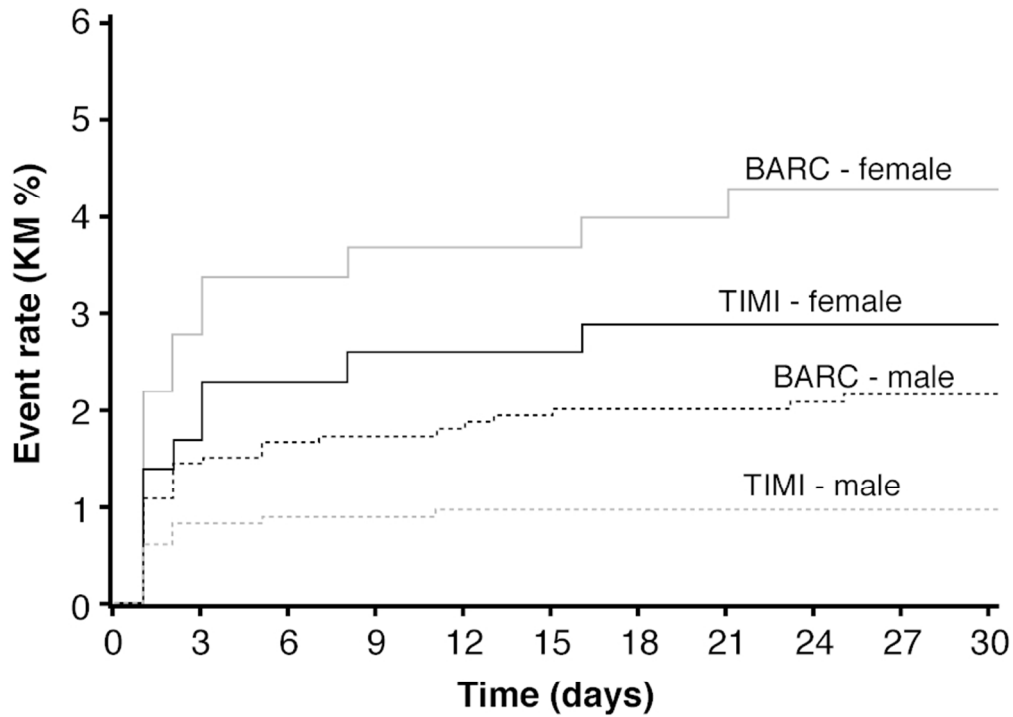

|                         |                            |
|-------------------------|----------------------------|
| <b>TIMI major bleed</b> | <b>BARC type 3–5 bleed</b> |
| Female 10/369 (2.7%)    | Female 16/369 (4.3%)       |
| Male 14/1489 (0.9%)     | Male 31/1489 (2.1%)        |

Caption : Figure 4. Cumulative Kaplan-Meier estimates of the incidence of the TIMI major bleeding and BARC type 3-5 bleeding at 30 days by gender.

79x69mm (300 x 300 DPI)

only

**Supplementary table 1** Association between gender and efficacy of randomised treatment – clinical outcomes

| Outcomes                                                                   | Gender | Pre-hospital ticagrelor (n=906) |                               | In-hospital ticagrelor (n=952) |                               | Model, n | Adjusted hazard ratio ≠ (95% CI) | P-value (interaction) ≠ |
|----------------------------------------------------------------------------|--------|---------------------------------|-------------------------------|--------------------------------|-------------------------------|----------|----------------------------------|-------------------------|
|                                                                            |        | N                               | Patients with endpoint, n (%) | N                              | Patients with endpoint, n (%) |          |                                  |                         |
| Composite of Death/MI/Stroke/Urgent Revasc/Definite Acute Stent Thrombosis | Female | 173                             | 13 (7.5)                      | 196                            | 12 (6.1)                      | 1613     | 0.98 (0.42-2.27)                 | 0.87                    |
|                                                                            | Male   | 733                             | 28 (3.8)                      | 756                            | 30 (4.0)                      |          | 0.90 (0.51-1.59)                 |                         |
| Composite of Death/MI/Urgent Revasc                                        | Female | 173                             | 13 (7.5)                      | 196                            | 10 (5.1)                      | 1613     | 1.32 (0.55-3.20)                 | 0.55                    |
|                                                                            | Male   | 733                             | 26 (3.5)                      | 756                            | 24 (3.2)                      |          | 0.95 (0.52-1.76)                 |                         |
| All-cause mortality                                                        | Female | 173                             | 13 (7.5)                      | 196                            | 8 (4.1)                       | 1613     | 1.59 (0.61-4.12)                 | 0.93                    |
|                                                                            | Male   | 733                             | 17 (2.3)                      | 756                            | 11 (1.5)                      |          | 1.50 (0.60-3.74)                 |                         |
| Myocardial infarction                                                      | Female | 173                             | 1 (0.6)                       | 196                            | 2 (1.0)                       | 1613     | 0.44 (0.04-4.95)                 | 0.72                    |
|                                                                            | Male   | 733                             | 6 (0.8)                       | 756                            | 8 (1.1)                       |          | 0.72 (0.25-2.09)                 |                         |
| Stroke                                                                     | Female | 173                             | 1 (0.6)                       | 196                            | 2 (1.0)                       | 1613     | 0.54 (0.05-5.90)                 | 0.99                    |
|                                                                            | Male   | 733                             | 3 (0.4)                       | 756                            | 0 (0.0)                       |          | Nt estimated                     |                         |
| Urgent revascularization                                                   | Female | 173                             | 1 (0.6)                       | 196                            | 1 (0.5)                       | 1613     | 0.86 (0.05-14.07)                | 0.76                    |
|                                                                            | Male   | 733                             | 4 (0.5)                       | 756                            | 7 (0.9)                       |          | 0.54 (0.15-1.87)                 |                         |
| Definite Acute Stent Thrombosis                                            | Female | 173                             | 1 (0.6)                       | 196                            | 2 (1.0)                       | 1613     | 0.37 (0.03-4.27)                 | 0.49                    |
|                                                                            | Male   | 733                             | 1 (0.1)                       | 756                            | 9 (1.2)                       |          | 0.12 (0.01-1.02)                 |                         |
| Acute Stent Thrombosis (definite or probable)                              | Female | 173                             | 7 (4.0)                       | 196                            | 4 (2.0)                       | 1613     | 1.31 (0.37-4.69)                 | 0.52                    |
|                                                                            | Male   | 733                             | 14 (1.9)                      | 756                            | 16 (2.1)                      |          | 0.80 (0.35-1.80)                 |                         |

1  
2  
3  
4  
5  
6  
7  
8  
9  
10  
11  
12  
13  
14  
15  
16  
17  
18  
19  
20  
21  
22  
23  
24  
25  
26  
27  
28  
29  
30  
31  
32  
33  
34  
35  
36  
37  
38  
39  
40  
41  
42  
43  
44  
45  
46  
47  
48  
49  
50  
51  
52  
53  
54  
55  
56  
57  
58  
59  
60

≠ Adjusted hazard (for female versus male) and p-values for interaction was calculated from Cox proportional hazard model including gender, age, weight, prior myocardial infarction, prior percutaneous coronary intervention, diabetes, hypertension, non-hemorrhagic stroke, gastrointestinal bleeding, time from symptom onset to pre-hospital ECG, admission Killip class, baseline hemoglobin, estimated glomerular filtration rate, glycoprotein IIb/IIIa inhibitor use during index procedure, location of myocardial infarction

For peer review only

**Supplementary table 2** Association between gender and efficacy of randomised treatment – primary and secondary outcomes

| Outcomes                                                                                                   | Gender | Pre-hospital ticagrelor (n=906) |                               | In-hospital ticagrelor (n=952) |                               | Model N ≠ | Adjusted odds ratio ≠ (95% CI) | P-value (interaction) ≠ |
|------------------------------------------------------------------------------------------------------------|--------|---------------------------------|-------------------------------|--------------------------------|-------------------------------|-----------|--------------------------------|-------------------------|
|                                                                                                            |        | N                               | Patients with endpoint, n (%) | N                              | Patients with endpoint, n (%) |           |                                |                         |
| Absence of ST segment elevation resolution ≥ 70% pre-PCI                                                   | Female | 142                             | 122 (85.9)                    | 168                            | 147 (87.5)                    | 1419      | 0.75 (0.37-1.53)               | 0.71                    |
|                                                                                                            | Male   | 632                             | 550 (87.0)                    | 656                            | 575 (87.7)                    |           | 0.85 (0.59-1.23)               |                         |
| Absence of TIMI flow grade 3 in infarct related artery at initial angiography                              | Female | 155                             | 127 (81.9)                    | 175                            | 135 (77.1)                    | 1478      | 1.36 (0.76-2.41)               | 0.19                    |
|                                                                                                            | Male   | 669                             | 554 (82.8)                    | 681                            | 576 (84.6)                    |           | 0.88 (0.64-1.20)               |                         |
| Absence of ST segment resolution ≥ 70% AND absence of TIMI flow grade 3 in infarct related artery pre-PCI  | Female | 129                             | 120 (93.0)                    | 153                            | 142 (92.8)                    | 1304      | 1.07 (0.41-2.81)               | 0.84                    |
|                                                                                                            | Male   | 590                             | 557 (94.4)                    | 598                            | 568 (95.0)                    |           | 0.96 (0.57-1.62)               |                         |
| Absence of ST-segment resolution ≥70% after PCI                                                            | Female | 144                             | 61 (42.4)                     | 163                            | 80 (49.1)                     | 1409      | 0.76 (0.47-1.25)               | 0.51                    |
|                                                                                                            | Male   | 629                             | 291 (46.3)                    | 650                            | 326 (50.2)                    |           | 0.92 (0.72-1.17)               |                         |
| Absence of TIMI flow grade 3 in infarct related artery after PCI                                           | Female | 144                             | 30 (20.8)                     | 154                            | 37 (24.0)                     | 1368      | 0.93 (0.51-1.71)               | 0.98                    |
|                                                                                                            | Male   | 621                             | 107 (17.2)                    | 631                            | 117 (18.5)                    |           | 0.92 (0.68-1.26)               |                         |
| Absence of ST segment resolution ≥70% AND absence of TIMI flow grade 3 in infarct related artery after PCI | Female | 125                             | 60 (48.0)                     | 138                            | 81 (58.7)                     | 1235      | 0.64 (0.38-1.10)               | 0.13                    |
|                                                                                                            | Male   | 562                             | 282 (50.2)                    | 565                            | 290 (51.3)                    |           | 1.01 (0.78-1.32)               |                         |



1  
2  
3  
4  
5  
6  
7  
8  
9  
10  
11  
12  
13  
14  
15  
16  
17  
18  
19  
20  
21  
22  
23  
24  
25  
26  
27  
28  
29  
30  
31  
32  
33  
34  
35  
36  
37  
38  
39  
40  
41  
42  
43  
44  
45  
46  
47  
48  
49  
50  
51  
52  
53  
54  
55  
56  
57  
58  
59  
60

≠ Adjusted odds ratio (for female versus male) and p-values for interaction was calculated from logistic regression model including gender, age, weight, prior myocardial infarction, prior percutaneous coronary intervention, diabetes, hypertension, non-hemorrhagic stroke, gastrointestinal bleeding, time from symptom onset to pre-hospital ECG, admission Killip class, baseline hemoglobin, estimated glomerular filtration rate, glycoprotein IIb/IIIa inhibitor use during index procedure, location of myocardial infarction

For peer review only

**Supplementary table 3** Association between gender and safety of randomised treatment (safety outcomes)

| End point                                | Gender | Pre-hospital ticagrelor (n=906) |                               | In-hospital ticagrelor (n=952) |                               | Model N ≠ | Adjusted hazard ratio ≠ (95% CI) | P-value (interaction) ≠ |
|------------------------------------------|--------|---------------------------------|-------------------------------|--------------------------------|-------------------------------|-----------|----------------------------------|-------------------------|
|                                          |        | N                               | Patients with endpoint, n (%) | N                              | Patients with endpoint, n (%) |           |                                  |                         |
| PLATO major bleeding                     | Female | 173                             | 6 (3.5)                       | 196                            | 11 (5.6)                      | 1613      | 0.61 (0.21-1.83)                 | 0.23                    |
|                                          | Male   | 733                             | 19 (2.6)                      | 756                            | 14 (1.9)                      |           | 1.39 (0.66-2.93)                 |                         |
| PLATO major and minor bleeding           | Female | 173                             | 7 (4.0)                       | 196                            | 13 (6.6)                      | 1613      | 0.59 (0.22-1.61)                 | 0.19                    |
|                                          | Male   | 733                             | 33 (4.5)                      | 756                            | 26 (3.4)                      |           | 1.27 (0.73-2.21)                 |                         |
| TIMI major bleeding                      | Female | 173                             | 3 (1.7)                       | 196                            | 7 (3.6)                       | 1613      | 0.60 (0.14-2.54)                 | 0.28                    |
|                                          | Male   | 733                             | 9 (1.2)                       | 756                            | 5 (0.7)                       |           | 1.62 (0.53-4.98)                 |                         |
| TIMI major and minor bleeding            | Female | 173                             | 6 (3.5)                       | 196                            | 12 (6.1)                      | 1613      | 0.55 (0.19-1.60)                 | 0.24                    |
|                                          | Male   | 733                             | 29 (4.0)                      | 756                            | 25 (3.3)                      |           | 1.14 (0.64-2.03)                 |                         |
| BARC type 3-5 (major) bleeding           | Female | 173                             | 6 (3.5)                       | 196                            | 10 (5.1)                      | 1613      | 0.69 (0.23-2.11)                 | 0.26                    |
|                                          | Male   | 733                             | 18 (2.5)                      | 756                            | 13 (1.7)                      |           | 1.51 (0.70-3.26)                 |                         |
| BARC type 2-5 (major and minor) bleeding | Female | 173                             | 7 (4.0)                       | 196                            | 13 (6.6)                      | 1613      | 0.59 (0.22-1.60)                 | 0.21                    |
|                                          | Male   | 733                             | 31 (4.2)                      | 756                            | 25 (3.3)                      |           | 1.23 (0.70-2.17)                 |                         |

1  
2  
3  
4  
5  
6  
7  
8  
9  
10  
11  
12  
13  
14  
15  
16  
17  
18  
19  
20  
21  
22  
23  
24  
25  
26  
27  
28  
29  
30  
31  
32  
33  
34  
35  
36  
37  
38  
39  
40  
41  
42  
43  
44  
45  
46  
47  
48  
49  
50  
51  
52  
53  
54  
55  
56  
57  
58  
59  
60

≠Adjusted hazard (for female versus male) and p-values for interaction was calculated from Cox proportional hazard model including gender, age, weight, prior myocardial infarction, prior percutaneous coronary intervention, diabetes, hypertension, non-hemorrhagic stroke, gastrointestinal bleeding, time from symptom onset to pre-hospital ECG, admission Killip class, baseline hemoglobin, estimated glomerular filtration rate, glycoprotein IIb/IIIa inhibitor use during index procedure, location of myocardial infarction

For peer review only

STROBE 2007 (v4) Statement—Checklist of items that should be included in reports of *cohort studies*

| Section/Topic                | Item # | Recommendation                                                                                                                                                                       | Reported on page # |
|------------------------------|--------|--------------------------------------------------------------------------------------------------------------------------------------------------------------------------------------|--------------------|
| Title and abstract           | 1      | (a) Indicate the study's design with a commonly used term in the title or the abstract                                                                                               | 1, 2               |
|                              |        | (b) Provide in the abstract an informative and balanced summary of what was done and what was found                                                                                  | 2, 3               |
| <b>Introduction</b>          |        |                                                                                                                                                                                      |                    |
| Background/rationale         | 2      | Explain the scientific background and rationale for the investigation being reported                                                                                                 | 4                  |
| Objectives                   | 3      | State specific objectives, including any prespecified hypotheses                                                                                                                     | 4                  |
| <b>Methods</b>               |        |                                                                                                                                                                                      |                    |
| Study design                 | 4      | Present key elements of study design early in the paper                                                                                                                              | 4,5                |
| Setting                      | 5      | Describe the setting, locations, and relevant dates, including periods of recruitment, exposure, follow-up, and data collection                                                      | 4,5                |
| Participants                 | 6      | (a) Give the eligibility criteria, and the sources and methods of selection of participants. Describe methods of follow-up                                                           | 4,5                |
|                              |        | (b) For matched studies, give matching criteria and number of exposed and unexposed                                                                                                  | NA                 |
| Variables                    | 7      | Clearly define all outcomes, exposures, predictors, potential confounders, and effect modifiers. Give diagnostic criteria, if applicable                                             | 5, 6               |
| Data sources/<br>measurement | 8*     | For each variable of interest, give sources of data and details of methods of assessment (measurement). Describe comparability of assessment methods if there is more than one group | 5, 6               |
| Bias                         | 9      | Describe any efforts to address potential sources of bias                                                                                                                            | 5,6                |
| Study size                   | 10     | Explain how the study size was arrived at                                                                                                                                            | N/A                |
| Quantitative variables       | 11     | Explain how quantitative variables were handled in the analyses. If applicable, describe which groupings were chosen and why                                                         | 5,6                |
| Statistical methods          | 12     | (a) Describe all statistical methods, including those used to control for confounding                                                                                                | 5, 6               |
|                              |        | (b) Describe any methods used to examine subgroups and interactions                                                                                                                  | 5, 6               |
|                              |        | (c) Explain how missing data were addressed                                                                                                                                          | 6                  |
|                              |        | (d) If applicable, explain how loss to follow-up was addressed                                                                                                                       | N/A                |
|                              |        | (e) Describe any sensitivity analyses                                                                                                                                                | 6                  |
| <b>Results</b>               |        |                                                                                                                                                                                      |                    |

|                          |     |                                                                                                                                                                                                              |              |
|--------------------------|-----|--------------------------------------------------------------------------------------------------------------------------------------------------------------------------------------------------------------|--------------|
| Participants             | 13* | (a) Report numbers of individuals at each stage of study—eg numbers potentially eligible, examined for eligibility, confirmed eligible, included in the study, completing follow-up, and analysed            | 7            |
|                          |     | (b) Give reasons for non-participation at each stage                                                                                                                                                         | N/A          |
|                          |     | (c) Consider use of a flow diagram                                                                                                                                                                           | 4            |
| Descriptive data         | 14* | (a) Give characteristics of study participants (eg demographic, clinical, social) and information on exposures and potential confounders                                                                     | 7, 8,        |
|                          |     | (b) Indicate number of participants with missing data for each variable of interest                                                                                                                          | 6            |
|                          |     | (c) Summarise follow-up time (eg, average and total amount)                                                                                                                                                  | 5            |
| Outcome data             | 15* | Report numbers of outcome events or summary measures over time                                                                                                                                               | 7,8          |
| Main results             | 16  | (a) Give unadjusted estimates and, if applicable, confounder-adjusted estimates and their precision (eg, 95% confidence interval). Make clear which confounders were adjusted for and why they were included | 7, 8         |
|                          |     | (b) Report category boundaries when continuous variables were categorized                                                                                                                                    | yes          |
|                          |     | (c) If relevant, consider translating estimates of relative risk into absolute risk for a meaningful time period                                                                                             | N7A          |
| Other analyses           | 17  | Report other analyses done—eg analyses of subgroups and interactions, and sensitivity analyses                                                                                                               | 7, 8         |
| <b>Discussion</b>        |     |                                                                                                                                                                                                              |              |
| Key results              | 18  | Summarise key results with reference to study objectives                                                                                                                                                     | 8, 9, 10, 11 |
| <b>Limitations</b>       |     |                                                                                                                                                                                                              |              |
| Interpretation           | 20  | Give a cautious overall interpretation of results considering objectives, limitations, multiplicity of analyses, results from similar studies, and other relevant evidence                                   | 11, 12       |
| Generalisability         | 21  | Discuss the generalisability (external validity) of the study results                                                                                                                                        | 3, 11        |
| <b>Other information</b> |     |                                                                                                                                                                                                              |              |
| Funding                  | 22  | Give the source of funding and the role of the funders for the present study and, if applicable, for the original study on which the present article is based                                                | 13           |

\*Give information separately for cases and controls in case-control studies and, if applicable, for exposed and unexposed groups in cohort and cross-sectional studies.

**Note:** An Explanation and Elaboration article discusses each checklist item and gives methodological background and published examples of transparent reporting. The STROBE checklist is best used in conjunction with this article (freely available on the Web sites of PLoS Medicine at <http://www.plosmedicine.org/>, Annals of Internal Medicine at <http://www.annals.org/>, and Epidemiology at <http://www.epidem.com/>). Information on the STROBE Initiative is available at [www.strobe-statement.org](http://www.strobe-statement.org).
