# Supplementary material for: Association between gender and short-term outcome in patients with ST elevation myocardial infraction participating in the international, prospective, randomised Administration of Ticagrelor in the catheterisation Laboratory or in the Ambulance for New ST elevation myocardial Infarction to open the Coronary artery (ATLANTIC) trial: a prespecified analysis
Source: PubMed Central journal article supplement — BMJ Open. 2017 Sep 21;7(9):e015241. doi: 10.1136/bmjopen-2016-015241 (PMC5623480; doi:10.1136/bmjopen-2016-015241), 2017-09-21
Supplement: bmjopen-2016-015241supp001.pdf [file bmjopen-2016-015241supp001.pdf]

**Supplementary table 1** Association between gender and efficacy of randomised treatment – clinical outcomes

| Outcomes                                                                   | Gender | Pre-hospital ticagrelor (n=906) |                               | In-hospital ticagrelor (n=952) |                               | Model , n | Adjusted hazard ratio ≠ (95% CI) | P-value (interaction) ≠ |
|----------------------------------------------------------------------------|--------|---------------------------------|-------------------------------|--------------------------------|-------------------------------|-----------|----------------------------------|-------------------------|
|                                                                            |        | N                               | Patients with endpoint, n (%) | N                              | Patients with endpoint, n (%) |           |                                  |                         |
| Composite of Death/MI/Stroke/Urgent Revasc/Definite Acute Stent Thrombosis | Female | 173                             | 13 (7.5)                      | 196                            | 12 (6.1)                      | 1613      | 0.98 (0.42-2.27)                 | 0.87                    |
|                                                                            | Male   | 733                             | 28 (3.8)                      | 756                            | 30 (4.0)                      |           | 0.90 (0.51-1.59)                 |                         |
| Composite of Death/MI/Urgent Revasc                                        | Female | 173                             | 13 (7.5)                      | 196                            | 10 (5.1)                      | 1613      | 1.32 (0.55-3.20)                 | 0.55                    |
|                                                                            | Male   | 733                             | 26 (3.5)                      | 756                            | 24 (3.2)                      |           | 0.95 (0.52-1.76)                 |                         |
| All-cause mortality                                                        | Female | 173                             | 13 (7.5)                      | 196                            | 8 (4.1)                       | 1613      | 1.59 (0.61-4.12)                 | 0.93                    |
|                                                                            | Male   | 733                             | 17 (2.3)                      | 756                            | 11 (1.5)                      |           | 1.50 (0.60-3.74)                 |                         |
| Myocardial infarction                                                      | Female | 173                             | 1 (0.6)                       | 196                            | 2 (1.0)                       | 1613      | 0.44 (0.04-4.95)                 | 0.72                    |
|                                                                            | Male   | 733                             | 6 (0.8)                       | 756                            | 8 (1.1)                       |           | 0.72 (0.25-2.09)                 |                         |
| Stroke                                                                     | Female | 173                             | 1 (0.6)                       | 196                            | 2 (1.0)                       | 1613      | 0.54 (0.05-5.90)                 | 0.99                    |
|                                                                            | Male   | 733                             | 3 (0.4)                       | 756                            | 0 (0.0)                       |           | Nt estimated                     |                         |
| Urgent revascularization                                                   | Female | 173                             | 1 (0.6)                       | 196                            | 1 (0.5)                       | 1613      | 0.86 (0.05-14.07)                | 0.76                    |
|                                                                            | Male   | 733                             | 4 (0.5)                       | 756                            | 7 (0.9)                       |           | 0.54 (0.15-1.87)                 |                         |
| Definite Acute Stent Thrombosis                                            | Female | 173                             | 1 (0.6)                       | 196                            | 2 (1.0)                       | 1613      | 0.37 (0.03-4.27)                 | 0.49                    |
|                                                                            | Male   | 733                             | 1 (0.1)                       | 756                            | 9 (1.2)                       |           | 0.12 (0.01-1.02)                 |                         |
| Acute Stent Thrombosis (definite or probable)                              | Female | 173                             | 7 (4.0)                       | 196                            | 4 (2.0)                       | 1613      | 1.31 (0.37-4.69)                 | 0.52                    |
|                                                                            | Male   | 733                             | 14 (1.9)                      | 756                            | 16 (2.1)                      |           | 0.80 (0.35-1.80)                 |                         |

≠ Adjusted hazard (for female versus male) and p-values for interaction was calculated from Cox proportional hazard model including gender, age, weight, prior myocardial infarction, prior percutaneous coronary intervention, diabetes, hypertension, non-hemorrhagic stroke, gastrointestinal bleeding, time from symptom onset to pre-hospital ECG, admission Killip class, baseline hemoglobin, estimated glomerular filtration rate, glycoprotein IIb/IIIa inhibitor use during index procedure, location of myocardial infarction

**Supplementary table 2** Association between gender and efficacy of randomised treatment – primary and secondary outcomes

| Outcomes                                                                                                   | Gender | Pre-hospital ticagrelor (n=906) |                               | In-hospital ticagrelor (n=952) |                               | Model N ≠ | Adjusted odds ratio ≠ (95% CI) | P-value (interaction) ≠ |
|------------------------------------------------------------------------------------------------------------|--------|---------------------------------|-------------------------------|--------------------------------|-------------------------------|-----------|--------------------------------|-------------------------|
|                                                                                                            |        | N                               | Patients with endpoint, n (%) | N                              | Patients with endpoint, n (%) |           |                                |                         |
| Absence of ST segment elevation resolution ≥ 70% pre-PCI                                                   | Female | 142                             | 122 (85.9)                    | 168                            | 147 (87.5)                    | 1419      | 0.75 (0.37-1.53)               | 0.71                    |
|                                                                                                            | Male   | 632                             | 550 (87.0)                    | 656                            | 575 (87.7)                    |           | 0.85 (0.59-1.23)               |                         |
| Absence of TIMI flow grade 3 in infarct related artery at initial angiography                              | Female | 155                             | 127 (81.9)                    | 175                            | 135 (77.1)                    | 1478      | 1.36 (0.76-2.41)               | 0.19                    |
|                                                                                                            | Male   | 669                             | 554 (82.8)                    | 681                            | 576 (84.6)                    |           | 0.88 (0.64-1.20)               |                         |
| Absence of ST segment resolution ≥ 70% AND absence of TIMI flow grade 3 in infarct related artery pre-PCI  | Female | 129                             | 120 (93.0)                    | 153                            | 142 (92.8)                    | 1304      | 1.07 (0.41-2.81)               | 0.84                    |
|                                                                                                            | Male   | 590                             | 557 (94.4)                    | 598                            | 568 (95.0)                    |           | 0.96 (0.57-1.62)               |                         |
| Absence of ST-segment resolution ≥70% after PCI                                                            | Female | 144                             | 61 (42.4)                     | 163                            | 80 (49.1)                     | 1409      | 0.76 (0.47-1.25)               | 0.51                    |
|                                                                                                            | Male   | 629                             | 291 (46.3)                    | 650                            | 326 (50.2)                    |           | 0.92 (0.72-1.17)               |                         |
| Absence of TIMI flow grade 3 in infarct related artery after PCI                                           | Female | 144                             | 30 (20.8)                     | 154                            | 37 (24.0)                     | 1368      | 0.93 (0.51-1.71)               | 0.98                    |
|                                                                                                            | Male   | 621                             | 107 (17.2)                    | 631                            | 117 (18.5)                    |           | 0.92 (0.68-1.26)               |                         |
| Absence of ST segment resolution ≥70% AND absence of TIMI flow grade 3 in infarct related artery after PCI | Female | 125                             | 60 (48.0)                     | 138                            | 81 (58.7)                     | 1235      | 0.64 (0.38-1.10)               | 0.13                    |
|                                                                                                            | Male   | 562                             | 282 (50.2)                    | 565                            | 290 (51.3)                    |           | 1.01 (0.78-1.32)               |                         |

≠ Adjusted odds ratio (for female versus male) and p-values for interaction was calculated from logistic regression model including gender, age, weight, prior myocardial infarction, prior percutaneous coronary intervention, diabetes, hypertension, non-hemorrhagic stroke, gastrointestinal bleeding, time from symptom onset to pre-hospital ECG, admission Killip class, baseline hemoglobin, estimated glomerular filtration rate, glycoprotein IIb/IIIa inhibitor use during index procedure, location of myocardial infarction

**Supplementary table 3** Association between gender and safety of randomised treatment (safety outcomes)

| End point                                | Gender | Pre-hospital ticagrelor (n=906) |                               | In-hospital ticagrelor (n=952) |                               | Model N ≠ | Adjusted hazard ratio ≠ (95% CI) | P-value (interaction) ≠ |
|------------------------------------------|--------|---------------------------------|-------------------------------|--------------------------------|-------------------------------|-----------|----------------------------------|-------------------------|
|                                          |        | N                               | Patients with endpoint, n (%) | N                              | Patients with endpoint, n (%) |           |                                  |                         |
| PLATO major bleeding                     | Female | 173                             | 6 (3.5)                       | 196                            | 11 (5.6)                      | 1613      | 0.61 (0.21-1.83)                 | 0.23                    |
|                                          | Male   | 733                             | 19 (2.6)                      | 756                            | 14 (1.9)                      |           | 1.39 (0.66-2.93)                 |                         |
| PLATO major and minor bleeding           | Female | 173                             | 7 (4.0)                       | 196                            | 13 (6.6)                      | 1613      | 0.59 (0.22-1.61)                 | 0.19                    |
|                                          | Male   | 733                             | 33 (4.5)                      | 756                            | 26 (3.4)                      |           | 1.27 (0.73-2.21)                 |                         |
| TIMI major bleeding                      | Female | 173                             | 3 (1.7)                       | 196                            | 7 (3.6)                       | 1613      | 0.60 (0.14-2.54)                 | 0.28                    |
|                                          | Male   | 733                             | 9 (1.2)                       | 756                            | 5 (0.7)                       |           | 1.62 (0.53-4.98)                 |                         |
| TIMI major and minor bleeding            | Female | 173                             | 6 (3.5)                       | 196                            | 12 (6.1)                      | 1613      | 0.55 (0.19-1.60)                 | 0.24                    |
|                                          | Male   | 733                             | 29 (4.0)                      | 756                            | 25 (3.3)                      |           | 1.14 (0.64-2.03)                 |                         |
| BARC type 3-5 (major) bleeding           | Female | 173                             | 6 (3.5)                       | 196                            | 10 (5.1)                      | 1613      | 0.69 (0.23-2.11)                 | 0.26                    |
|                                          | Male   | 733                             | 18 (2.5)                      | 756                            | 13 (1.7)                      |           | 1.51 (0.70-3.26)                 |                         |
| BARC type 2-5 (major and minor) bleeding | Female | 173                             | 7 (4.0)                       | 196                            | 13 (6.6)                      | 1613      | 0.59 (0.22-1.60)                 | 0.21                    |
|                                          | Male   | 733                             | 31 (4.2)                      | 756                            | 25 (3.3)                      |           | 1.23 (0.70-2.17)                 |                         |

≠Adjusted hazard (for female versus male) and p-values for interaction was calculated from Cox proportional hazard model including gender, age, weight, prior myocardial infarction, prior percutaneous coronary intervention, diabetes, hypertension, non-hemorrhagic stroke, gastrointestinal bleeding, time from symptom onset to pre-hospital ECG, admission Killip class, baseline hemoglobin, estimated glomerular filtration rate, glycoprotein IIb/IIIa inhibitor use during index procedure, location of myocardial infarction
